# Supplementary material for: Strongly coloured thiocyanate frameworks with perovskite-analogue structures
Source: Chem Sci. 2018 Oct 26;10(3):793–801. doi: 10.1039/c8sc04082f (PMC6345348; doi:10.1039/c8sc04082f)
Supplement: SC-010-C8SC04082F-s002 [file SC-010-C8SC04082F-s002.csv]

Entry	Index	NAME	ANG1
search3|ARADOO|0	1	ARADOO	151.822
search3|ARADOO|1	2	ARADOO	142.406
search3|ASUFOL|2	3	ASUFOL	167.16
search3|ASUFOL|3	4	ASUFOL	172.434
search3|ASUFUR|4	5	ASUFUR	169.994
search3|ASUGAY|5	6	ASUGAY	169.663
search3|ASUGEC|6	7	ASUGEC	178.95
search3|ASUGEC|7	8	ASUGEC	174.447
search3|ASUGEC|8	9	ASUGEC	177.875
search3|ASUGIG|9	10	ASUGIG	177.749
search3|ASUGIG|10	11	ASUGIG	163.578
search3|ASUGIG|11	12	ASUGIG	176.157
search3|ASUGOM|12	13	ASUGOM	176.837
search3|ASUGOM|13	14	ASUGOM	169.78
search3|ASUGOM|14	15	ASUGOM	175.6
search3|ASUGUS|15	16	ASUGUS	173.29
search3|ATAMEP|16	17	ATAMEP	161.437
search3|ATATIA|17	18	ATATIA	174.625
search3|ATATIA|18	19	ATATIA	170.806
search3|ATATIA|19	20	ATATIA	172.424
search3|ATAVAU|20	21	ATAVAU	170.706
search3|ATAVEY|21	22	ATAVEY	169.753
search3|ATAVEY01|22	23	ATAVEY01	162.859
search3|ATEHUE|23	24	ATEHUE	174.516
search3|ATIRIG|24	25	ATIRIG	154.858
search3|ATIRIG|25	26	ATIRIG	165.417
search3|AVARIA|26	27	AVARIA	173.154
search3|AVARIA|27	28	AVARIA	173.59
search3|AVARIA|28	29	AVARIA	178.053
search3|AVARIA|29	30	AVARIA	177.556
search3|AVARIA|30	31	AVARIA	174.685
search3|AVARIA|31	32	AVARIA	154.55
search3|AVARIA|32	33	AVARIA	159.077
search3|AVARIA|33	34	AVARIA	177.382
search3|AVELIY|34	35	AVELIY	143.744
search3|AVELIY|35	36	AVELIY	157.627
search3|AVELIY|36	37	AVELIY	153.226
search3|AVELIY|37	38	AVELIY	146.889
search3|AVELIY|38	39	AVELIY	150.723
search3|AVELIY|39	40	AVELIY	163.263
search3|AWATAV|40	41	AWATAV	155.063
search3|AWATAV|41	42	AWATAV	161.449
search3|AWATAV|42	43	AWATAV	143.38
search3|DAFLIF04|43	44	DAFLIF04	157.536
search3|ERUDEC|44	45	ERUDEC	164.847
search3|ERUDOM|45	46	ERUDOM	165.232
search3|ESETIH|46	47	ESETIH	178.18
search3|ESETIH|47	48	ESETIH	173.071
search3|ESEWEG|48	49	ESEWEG	176.8
search3|ESEWEG|49	50	ESEWEG	178.015
search3|ESIZAJ|50	51	ESIZAJ	170.488
search3|ESOSAI|51	52	ESOSAI	157.836
search3|ESOSAI|52	53	ESOSAI	156.847
search3|ESOSAI|53	54	ESOSAI	163.121
search3|ESOSAI|54	55	ESOSAI	161.962
search3|ESOSEM|55	56	ESOSEM	135.742
search3|ESOSEM|56	57	ESOSEM	165.218
search3|ESOSEM|57	58	ESOSEM	153.63
search3|ESOSEM|58	59	ESOSEM	158.845
search3|ETEVEG|59	60	ETEVEG	174.799
search3|ETEVIK|60	61	ETEVIK	162.901
search3|ETEVUW|61	62	ETEVUW	165.866
search3|ETOFAW|62	63	ETOFAW	168.009
search3|ETOFEA|63	64	ETOFEA	161.646
search3|ETOFOK|64	65	ETOFOK	157.938
search3|EVOQIR|65	66	EVOQIR	159.025
search3|EWIDOF|66	67	EWIDOF	175.584
search3|EWIDUL|67	68	EWIDUL	138.615
search3|EWIFAT|68	69	EWIFAT	167.302
search3|EWIFAT|69	70	EWIFAT	158.772
search3|EWIHUP|70	71	EWIHUP	175.679
search3|EWODEB|71	72	EWODEB	161.593
search3|FIRBOX02|72	73	FIRBOX02	178.667
search3|GOXMOX01|73	74	GOXMOX01	174.397
search3|IKUNIN|74	75	IKUNIN	157.923
search3|IKUNOT|75	76	IKUNOT	162.829
search3|IKUNUZ|76	77	IKUNUZ	158.659
search3|ISOHUV|77	78	ISOHUV	172.687
search3|ISOJAD|78	79	ISOJAD	162.533
search3|ISOJAD|79	80	ISOJAD	151.569
search3|ISUBUV|80	81	ISUBUV	160.188
search3|ISUBUV|81	82	ISUBUV	167.715
search3|IVIVAM|82	83	IVIVAM	170.617
search3|IWOKOW|83	84	IWOKOW	161.858
search3|IWOKOW|84	85	IWOKOW	163.351
search3|IWOKUC|85	86	IWOKUC	161.346
search3|IWOLAJ|86	87	IWOLAJ	173.181
search3|IWOLAJ|87	88	IWOLAJ	154.542
search3|IXUCIP|88	89	IXUCIP	162.215
search3|JUNWIA|89	90	JUNWIA	167.466
search3|JUNWOG|90	91	JUNWOG	176.201
search3|JUNWOG|91	92	JUNWOG	179.751
search3|JUNWOG|92	93	JUNWOG	179.584
search3|JUNWOG|93	94	JUNWOG	168.557
search3|JUNWUM|94	95	JUNWUM	175.961
search3|JUNWUM|95	96	JUNWUM	163.963
search3|KIJSAY01|96	97	KIJSAY01	173.37
search3|OTAGIB|97	98	OTAGIB	167.527
search3|OTAGIB01|98	99	OTAGIB01	165.916
search3|OWOFOX|99	100	OWOFOX	171.419
search3|OWOFOX|100	101	OWOFOX	173.643
search3|OWOFUD|101	102	OWOFUD	171.478
search3|OWOFUD|102	103	OWOFUD	172.156
search3|OWOPUN|103	104	OWOPUN	147.891
search3|PIRROZ01|104	105	PIRROZ01	175.653
search3|PIRROZ01|105	106	PIRROZ01	162.314
search3|PIRROZ01|106	107	PIRROZ01	168.65
search3|PIRROZ01|107	108	PIRROZ01	149.393
search3|RASSAH01|108	109	RASSAH01	153.388
search3|TCTPAG02|109	110	TCTPAG02	152.184
search3|USAROX|110	111	USAROX	172.95
search3|USOGAM|111	112	USOGAM	169.718
search3|USOGAM|112	113	USOGAM	159.303
search3|UVUKED|113	114	UVUKED	152.85
search3|UVUKUT|114	115	UVUKUT	162.013
search3|UVUKUT|115	116	UVUKUT	149.835
search3|UVUMAB|116	117	UVUMAB	175.17
search3|UVUMAB|117	118	UVUMAB	171.011
search3|UVUPAE|118	119	UVUPAE	168.673
search3|UVUVEO|119	120	UVUVEO	160.41
search3|UWIBEJ|120	121	UWIBEJ	135.744
search3|UWIBEJ|121	122	UWIBEJ	143.462
search3|UXOHEW|122	123	UXOHEW	172.597
search3|UXOHEW|123	124	UXOHEW	173.758
search3|UXOHEW|124	125	UXOHEW	167.408
search3|UXOHEW01|125	126	UXOHEW01	169.197
search3|UXOHEW01|126	127	UXOHEW01	169.53
search3|UXOHEW01|127	128	UXOHEW01	167.014
search3|UXOXUC|128	129	UXOXUC	160.316
search3|UXOXUC|129	130	UXOXUC	155.202
search3|UXOYAJ|130	131	UXOYAJ	155.788
search3|UXOYAJ|131	132	UXOYAJ	168.604
search3|YEFBIV01|132	133	YEFBIV01	167.336
search3|ABECUH|133	134	ABECUH	171.901
search3|ABECUH|134	135	ABECUH	177.936
search3|ABGTCU|135	136	ABGTCU	158.636
search3|ABISOV|136	137	ABISOV	153.433
search3|ABISOV|137	138	ABISOV	164.595
search3|ABISOV|138	139	ABISOV	160.735
search3|ABISOV|139	140	ABISOV	172.603
search3|ABISOV01|140	141	ABISOV01	162.347
search3|ABISOV01|141	142	ABISOV01	167.924
search3|ABISOV01|142	143	ABISOV01	165.229
search3|ABISOV01|143	144	ABISOV01	172.594
search3|ABISOV02|144	145	ABISOV02	165.81
search3|ABISOV02|145	146	ABISOV02	172.044
search3|ABISOV02|146	147	ABISOV02	168.478
search3|ABISOV02|147	148	ABISOV02	172.87
search3|ABISOV03|148	149	ABISOV03	166.461
search3|ABISOV03|149	150	ABISOV03	172.605
search3|ABISOV03|150	151	ABISOV03	167.519
search3|ABISOV03|151	152	ABISOV03	173.802
search3|ABISOV04|152	153	ABISOV04	172.193
search3|ABISOV04|153	154	ABISOV04	165.229
search3|ABISOV04|154	155	ABISOV04	173.337
search3|ABISOV04|155	156	ABISOV04	166.52
search3|ABISOV05|156	157	ABISOV05	165.441
search3|ABISOV05|157	158	ABISOV05	171.954
search3|ABISOV05|158	159	ABISOV05	168.296
search3|ABISOV05|159	160	ABISOV05	173.362
search3|ABISOV06|160	161	ABISOV06	165.613
search3|ABISOV06|161	162	ABISOV06	171.915
search3|ABISOV06|162	163	ABISOV06	166.789
search3|ABISOV06|163	164	ABISOV06	173.37
search3|ABISOV07|164	165	ABISOV07	172.288
search3|ABISOV07|165	166	ABISOV07	166.162
search3|ABISOV07|166	167	ABISOV07	173.212
search3|ABISOV07|167	168	ABISOV07	168.12
search3|ABITEM|168	169	ABITEM	172.048
search3|ABITEM|169	170	ABITEM	169.08
search3|ABITEM01|170	171	ABITEM01	173.629
search3|ABITEM01|171	172	ABITEM01	172.105
search3|ABITUC|172	173	ABITUC	172.435
search3|ABITUC|173	174	ABITUC	171.81
search3|ABITUC01|174	175	ABITUC01	171.325
search3|ABITUC01|175	176	ABITUC01	169.926
search3|ABIVAK|176	177	ABIVAK	174.691
search3|ABIVAK|177	178	ABIVAK	176.335
search3|ABIVAK|178	179	ABIVAK	174.32
search3|ABIVAK|179	180	ABIVAK	170.661
search3|ABIVAK|180	181	ABIVAK	165.544
search3|ABIVAK|181	182	ABIVAK	166.888
search3|ABIVAK01|182	183	ABIVAK01	176.505
search3|ABIVAK01|183	184	ABIVAK01	179.101
search3|ABIVAK01|184	185	ABIVAK01	175.547
search3|ABIVAK01|185	186	ABIVAK01	171.752
search3|ABIVAK01|186	187	ABIVAK01	172.924
search3|ABIVAK01|187	188	ABIVAK01	168.62
search3|ABIZES|188	189	ABIZES	176.62
search3|ABIZES|189	190	ABIZES	162.516
search3|ABIZUH|190	191	ABIZUH	174.047
search3|ABIZUH|191	192	ABIZUH	173.539
search3|ABOKUX|192	193	ABOKUX	157.039
search3|ABOKUX|193	194	ABOKUX	166.324
search3|ABOKUX|194	195	ABOKUX	158.657
search3|ABUXIE|195	196	ABUXIE	172.748
search3|ABUXIE|196	197	ABUXIE	175.371
search3|ACADEP|197	198	ACADEP	159.851
search3|ACADOZ|198	199	ACADOZ	175.287
search3|ACIKAA|199	200	ACIKAA	169.059
search3|ACIKAA|200	201	ACIKAA	172.106
search3|ACILOP|201	202	ACILOP	150.508
search3|ACIMEG|202	203	ACIMEG	164.07
search3|ACIMIK|203	204	ACIMIK	167.534
search3|ACIMIK|204	205	ACIMIK	167.694
search3|ACIMIK|205	206	ACIMIK	171.741
search3|ACIMIK|206	207	ACIMIK	172.109
search3|ACIMIK|207	208	ACIMIK	164.57
search3|ACIMIK|208	209	ACIMIK	168.698
search3|ACIMOQ|209	210	ACIMOQ	171.465
search3|ACIMOQ|210	211	ACIMOQ	171.949
search3|ACISOW|211	212	ACISOW	178.132
search3|ACISOW|212	213	ACISOW	169.601
search3|ACMCUB|213	214	ACMCUB	156.83
search3|ACNICP|214	215	ACNICP	160.774
search3|ACNICP|215	216	ACNICP	163.905
search3|ACUBEH|216	217	ACUBEH	173.307
search3|ACUBEH|217	218	ACUBEH	173.652
search3|ACUBEH|218	219	ACUBEH	164.123
search3|ACUBEH|219	220	ACUBEH	159.671
search3|ACUBEH|220	221	ACUBEH	171.161
search3|ACUYEC|221	222	ACUYEC	148.492
search3|ACUYIH|222	223	ACUYIH	129.847
search3|ACUYIH|223	224	ACUYIH	125.021
search3|ACUYIH|224	225	ACUYIH	161.33
search3|ACUYIH|225	226	ACUYIH	168.049
search3|ADADAM|226	227	ADADAM	161.163
search3|ADADAM|227	228	ADADAM	166.049
search3|ADADEQ|228	229	ADADEQ	160.499
search3|ADADIU|229	230	ADADIU	173.101
search3|ADUBEI|230	231	ADUBEI	164.068
search3|ADUBIM|231	232	ADUBIM	163.738
search3|ADUBOS|232	233	ADUBOS	156.774
search3|ADUXOO|233	234	ADUXOO	170.027
search3|ADUXOO|234	235	ADUXOO	157.709
search3|AEAICU|235	236	AEAICU	163.154
search3|AEAICU|236	237	AEAICU	168.677
search3|AEATCD01|237	238	AEATCD01	174.064
search3|AEATCD01|238	239	AEATCD01	144.067
search3|AEATCD10|239	240	AEATCD10	164.399
search3|AEATCD10|240	241	AEATCD10	139.7
search3|AEATCD10|241	242	AEATCD10	139.996
search3|AENAZN10|242	243	AENAZN10	164.735
search3|AEOXCU|243	244	AEOXCU	173.488
search3|AEPYCU|244	245	AEPYCU	166.613
search3|AFATAD|245	246	AFATAD	159.378
search3|AFATOR|246	247	AFATOR	165.077
search3|AFATOR|247	248	AFATOR	161.069
search3|AFECEV|248	249	AFECEV	180.0
search3|AFECEV|249	250	AFECEV	180.0
search3|AFEDIZ|250	251	AFEDIZ	169.403
search3|AFEJAY|251	252	AFEJAY	160.014
search3|AFEMII|252	253	AFEMII	174.454
search3|AFEYAL03|253	254	AFEYAL03	165.162
search3|AFEYAL03|254	255	AFEYAL03	164.774
search3|AFEYAL03|255	256	AFEYAL03	166.357
search3|AFEYAL05|256	257	AFEYAL05	163.69
search3|AFEYAL05|257	258	AFEYAL05	166.449
search3|AFEYAL06|258	259	AFEYAL06	163.148
search3|AFEYAL06|259	260	AFEYAL06	165.994
search3|AFIDID|260	261	AFIDID	154.478
search3|AFIDID|261	262	AFIDID	174.578
search3|AFIDID|262	263	AFIDID	157.205
search3|AFIDID|263	264	AFIDID	177.32
search3|AFOWOI|264	265	AFOWOI	175.919
search3|AFOWOI|265	266	AFOWOI	149.532
search3|AFUPOI|266	267	AFUPOI	167.979
search3|AFUPOI|267	268	AFUPOI	173.578
search3|AFUPOI|268	269	AFUPOI	156.936
search3|AGALUQ|269	270	AGALUQ	160.105
search3|AGALUQ|270	271	AGALUQ	164.24
search3|AGAMAX|271	272	AGAMAX	160.985
search3|AGAMAX|272	273	AGAMAX	163.013
search3|AGAMAX01|273	274	AGAMAX01	160.841
search3|AGAMAX01|274	275	AGAMAX01	160.122
search3|AGAMEB|275	276	AGAMEB	165.373
search3|AGAMEB|276	277	AGAMEB	166.832
search3|AGIDIF|277	278	AGIDIF	172.899
search3|AGIDIF|278	279	AGIDIF	167.354
search3|AGIGAA|279	280	AGIGAA	170.353
search3|AGIGAA|280	281	AGIGAA	154.943
search3|AGIZEX|281	282	AGIZEX	150.135
search3|AGOHUZ|282	283	AGOHUZ	175.622
search3|AGUJIW|283	284	AGUJIW	158.351
search3|AGUKIW|284	285	AGUKIW	169.721
search3|AGUKOC|285	286	AGUKOC	165.739
search3|AGUMEW|286	287	AGUMEW	159.897
search3|AGUMEW|287	288	AGUMEW	153.336
search3|AGUMIA|288	289	AGUMIA	158.892
search3|AGUMIA|289	290	AGUMIA	174.354
search3|AHACAN|290	291	AHACAN	161.749
search3|AHAHIB|291	292	AHAHIB	160.609
search3|AHAYAK|292	293	AHAYAK	163.18
search3|AJAXEP|293	294	AJAXEP	146.386
search3|AJAXEP|294	295	AJAXEP	162.835
search3|AJEVIU|295	296	AJEVIU	169.894
search3|AJEVIU|296	297	AJEVIU	165.145
search3|AJEVIU|297	298	AJEVIU	162.288
search3|AJIJOT|298	299	AJIJOT	143.787
search3|AJIJOT|299	300	AJIJOT	170.692
search3|AJIJOT|300	301	AJIJOT	157.803
search3|AKAGAU|301	302	AKAGAU	165.124
search3|AKAGAU|302	303	AKAGAU	159.479
search3|AKAGEY|303	304	AKAGEY	165.003
search3|AKAGEY|304	305	AKAGEY	154.694
search3|AKANIJ|305	306	AKANIJ	167.3
search3|AKANUV|306	307	AKANUV	180.0
search3|AKANUV01|307	308	AKANUV01	180.0
search3|AKENAF|308	309	AKENAF	168.36
search3|AKENAF01|309	310	AKENAF01	171.33
search3|AKIZEB|310	311	AKIZEB	164.769
search3|AKOBEH|311	312	AKOBEH	120.767
search3|AKONIX|312	313	AKONIX	150.861
search3|AKONIX|313	314	AKONIX	159.168
search3|AKOVOM|314	315	AKOVOM	172.116
search3|AKOVUS|315	316	AKOVUS	172.684
search3|AKOWAZ|316	317	AKOWAZ	167.601
search3|AKOWED|317	318	AKOWED	168.429
search3|AKOWIH|318	319	AKOWIH	173.118
search3|ALANOQ|319	320	ALANOQ	150.131
search3|ALANOQ|320	321	ALANOQ	144.732
search3|ALANOQ|321	322	ALANOQ	156.296
search3|ALANOQ|322	323	ALANOQ	150.288
search3|ALIMUF|323	324	ALIMUF	170.991
search3|ALIMUF|324	325	ALIMUF	151.317
search3|ALIVEX|325	326	ALIVEX	143.72
search3|ALOGAL|326	327	ALOGAL	157.689
search3|ALOGEP|327	328	ALOGEP	164.172
search3|ALOGEP|328	329	ALOGEP	168.003
search3|ALUMAW|329	330	ALUMAW	174.249
search3|ALUMAW|330	331	ALUMAW	176.793
search3|ALUMEA|331	332	ALUMEA	173.037
search3|ALUMEA|332	333	ALUMEA	176.009
search3|AMADUN|333	334	AMADUN	168.665
search3|AMICUW|334	335	AMICUW	175.316
search3|AMIQAO|335	336	AMIQAO	157.586
search3|AMIREV|336	337	AMIREV	170.12
search3|AMIRIZ|337	338	AMIRIZ	177.837
search3|AMIRIZ|338	339	AMIRIZ	161.955
search3|AMIRIZ|339	340	AMIRIZ	172.602
search3|AMIRIZ|340	341	AMIRIZ	168.892
search3|AMIRIZ01|341	342	AMIRIZ01	178.42
search3|AMIRIZ01|342	343	AMIRIZ01	161.787
search3|AMIRIZ01|343	344	AMIRIZ01	172.463
search3|AMIRIZ01|344	345	AMIRIZ01	172.878
search3|AMSNCO|345	346	AMSNCO	175.984
search3|AMUXEN|346	347	AMUXEN	170.932
search3|ANEDED|347	348	ANEDED	161.855
search3|ANEDED|348	349	ANEDED	164.528
search3|ANEDED|349	350	ANEDED	166.011
search3|ANEHAD|350	351	ANEHAD	173.869
search3|ANEHAD|351	352	ANEHAD	174.906
search3|ANESUI|352	353	ANESUI	157.762
search3|ANESUI|353	354	ANESUI	159.415
search3|ANIDEI|354	355	ANIDEI	177.602
search3|ANIDEI|355	356	ANIDEI	176.666
search3|ANIDEI01|356	357	ANIDEI01	175.728
search3|ANIDEI01|357	358	ANIDEI01	175.473
search3|ANIDEI01|358	359	ANIDEI01	176.568
search3|ANIDEI01|359	360	ANIDEI01	176.097
search3|ANIDEI02|360	361	ANIDEI02	176.335
search3|ANIDEI02|361	362	ANIDEI02	173.689
search3|APAICU|362	363	APAICU	168.12
search3|APAICU|363	364	APAICU	169.639
search3|APUTEM|364	365	APUTEM	166.811
search3|APUTEM|365	366	APUTEM	160.865
search3|AQRDNI|366	367	AQRDNI	171.141
search3|ARECEG|367	368	ARECEG	152.627
search3|AREHAG|368	369	AREHAG	173.198
search3|AREHAG|369	370	AREHAG	172.782
search3|AREHOU|370	371	AREHOU	171.842
search3|ASEKUE|371	372	ASEKUE	173.929
search3|ASEKUE|372	373	ASEKUE	165.697
search3|ASIYAC|373	374	ASIYAC	174.413
search3|ASIYAC|374	375	ASIYAC	172.326
search3|ASIYOQ|375	376	ASIYOQ	175.893
search3|ASIYOQ|376	377	ASIYOQ	163.193
search3|ASOZOX|377	378	ASOZOX	165.11
search3|ATUREM|378	379	ATUREM	162.526
search3|ATUREM|379	380	ATUREM	163.89
search3|ATUYEU|380	381	ATUYEU	160.73
search3|AVERAV|381	382	AVERAV	173.07
search3|AVUBIC|382	383	AVUBIC	172.45
search3|AVUJEG|383	384	AVUJEG	152.752
search3|AVUJEG01|384	385	AVUJEG01	156.038
search3|AWAWEB|385	386	AWAWEB	149.289
search3|AWOFUO|386	387	AWOFUO	167.721
search3|AWOFUO|387	388	AWOFUO	174.005
search3|AWOQUZ|388	389	AWOQUZ	164.814
search3|AWOQUZ|389	390	AWOQUZ	176.657
search3|AWOQUZ|390	391	AWOQUZ	163.584
search3|AWOQUZ|391	392	AWOQUZ	166.982
search3|AWUBEA|392	393	AWUBEA	172.499
search3|AWUBEA|393	394	AWUBEA	171.631
search3|AWUBEA|394	395	AWUBEA	177.688
search3|AWUBEA|395	396	AWUBEA	176.615
search3|AWUBEA|396	397	AWUBEA	164.341
search3|AWUBEA|397	398	AWUBEA	176.655
search3|AXAJUE|398	399	AXAJUE	147.826
search3|AXINUQ|399	400	AXINUQ	139.748
search3|AXIQED|400	401	AXIQED	163.857
search3|AYABAE|401	402	AYABAE	159.994
search3|AYABAE|402	403	AYABAE	145.548
search3|AYIQAB|403	404	AYIQAB	140.648
search3|AYIQAB|404	405	AYIQAB	138.605
search3|AYOKEF|405	406	AYOKEF	164.415
search3|AYOKEF|406	407	AYOKEF	165.781
search3|AZEBOW|407	408	AZEBOW	169.937
search3|AZEBOW|408	409	AZEBOW	167.342
search3|AZESIH|409	410	AZESIH	173.187
search3|BABLIB|410	411	BABLIB	171.964
search3|BACDIU|411	412	BACDIU	171.687
search3|BACDIU|412	413	BACDIU	159.683
search3|BACDOA|413	414	BACDOA	166.52
search3|BACDOA|414	415	BACDOA	173.466
search3|BACJEV|415	416	BACJEV	173.135
search3|BACKUN|416	417	BACKUN	163.322
search3|BACLEY|417	418	BACLEY	170.045
search3|BADCOA|418	419	BADCOA	161.017
search3|BADCOA|419	420	BADCOA	173.206
search3|BADCUG|420	421	BADCUG	164.184
search3|BADCUG|421	422	BADCUG	171.542
search3|BADDAN|422	423	BADDAN	157.952
search3|BADDAN|423	424	BADDAN	139.204
search3|BADDER|424	425	BADDER	164.683
search3|BADHEU|425	426	BADHEU	125.75
search3|BADHEU|426	427	BADHEU	145.172
search3|BADHEU|427	428	BADHEU	160.998
search3|BADHIY|428	429	BADHIY	132.401
search3|BADHIY|429	430	BADHIY	139.952
search3|BADHIY|430	431	BADHIY	144.846
search3|BADHOE|431	432	BADHOE	167.336
search3|BADHOE01|432	433	BADHOE01	161.174
search3|BADHUK|433	434	BADHUK	170.817
search3|BADJAS|434	435	BADJAS	167.246
search3|BAFSIM|435	436	BAFSIM	170.752
search3|BAGFIA|436	437	BAGFIA	174.09
search3|BAHLOL|437	438	BAHLOL	178.711
search3|BAHYIS|438	439	BAHYIS	172.658
search3|BAHZIT|439	440	BAHZIT	174.19
search3|BAICTC|440	441	BAICTC	169.906
search3|BAICTC|441	442	BAICTC	174.873
search3|BAJBEV|442	443	BAJBEV	165.04
search3|BAJBEV|443	444	BAJBEV	163.592
search3|BAJBEV|444	445	BAJBEV	161.848
search3|BAJBEV|445	446	BAJBEV	168.74
search3|BAJBIZ|446	447	BAJBIZ	165.645
search3|BAKFIE|447	448	BAKFIE	165.982
search3|BAKFIE|448	449	BAKFIE	174.607
search3|BAKHOL|449	450	BAKHOL	154.42
search3|BAKHOL|450	451	BAKHOL	145.127
search3|BAKHOL|451	452	BAKHOL	144.117
search3|BAKHUR|452	453	BAKHUR	141.591
search3|BAKHUR|453	454	BAKHUR	148.886
search3|BAKHUR|454	455	BAKHUR	156.611
search3|BAKHUR|455	456	BAKHUR	146.712
search3|BAKHUR|456	457	BAKHUR	105.709
search3|BAKWUH|457	458	BAKWUH	136.293
search3|BAMKAC|458	459	BAMKAC	132.027
search3|BANSEQ|459	460	BANSEQ	158.65
search3|BANSUG|460	461	BANSUG	160.951
search3|BANSUG|461	462	BANSUG	162.095
search3|BANTIV|462	463	BANTIV	149.931
search3|BANTIV01|463	464	BANTIV01	173.025
search3|BANTIV01|464	465	BANTIV01	169.596
search3|BANTIV02|465	466	BANTIV02	168.512
search3|BANTIV02|466	467	BANTIV02	173.914
search3|BANWES10|467	468	BANWES10	164.381
search3|BANWIW10|468	469	BANWIW10	170.884
search3|BAPLOU|469	470	BAPLOU	165.079
search3|BAPZAT|470	471	BAPZAT	162.991
search3|BAPZEX|471	472	BAPZEX	165.089
search3|BAPZIB|472	473	BAPZIB	158.139
search3|BAQCIF|473	474	BAQCIF	170.742
search3|BAQRAO|474	475	BAQRAO	137.608
search3|BAQRAO|475	476	BAQRAO	142.025
search3|BAQZOJ|476	477	BAQZOJ	151.847
search3|BAQZOJ|477	478	BAQZOJ	169.061
search3|BATWEY|478	479	BATWEY	169.968
search3|BATWEY|479	480	BATWEY	163.182
search3|BAVRUL|480	481	BAVRUL	163.969
search3|BAWXUU|481	482	BAWXUU	164.39
search3|BAXDOV|482	483	BAXDOV	175.914
search3|BAXGEO|483	484	BAXGEO	172.22
search3|BAXGEO01|484	485	BAXGEO01	177.185
search3|BAXGUE|485	486	BAXGUE	167.776
search3|BAXXAB|486	487	BAXXAB	174.719
search3|BAXXAB|487	488	BAXXAB	154.0
search3|BAXXAB01|488	489	BAXXAB01	154.165
search3|BAXXAB01|489	490	BAXXAB01	175.117
search3|BAXXAB02|490	491	BAXXAB02	175.9
search3|BAXXAB02|491	492	BAXXAB02	156.494
search3|BAXXAB03|492	493	BAXXAB03	176.381
search3|BAXXAB03|493	494	BAXXAB03	158.243
search3|BAXXAB04|494	495	BAXXAB04	176.574
search3|BAXXAB04|495	496	BAXXAB04	160.502
search3|BAXXAB05|496	497	BAXXAB05	152.508
search3|BAXXAB05|497	498	BAXXAB05	175.077
search3|BAYMAQ|498	499	BAYMAQ	167.317
search3|BAYZEH|499	500	BAYZEH	164.629
search3|BAYZEH|500	501	BAYZEH	156.932
search3|BAYZEH01|501	502	BAYZEH01	165.255
search3|BAYZEH01|502	503	BAYZEH01	151.292
search3|BAZSIE|503	504	BAZSIE	162.299
search3|BAZSIE|504	505	BAZSIE	167.267
search3|BAZSUR|505	506	BAZSUR	176.069
search3|BAZTAY|506	507	BAZTAY	176.583
search3|BAZTOL|507	508	BAZTOL	173.706
search3|BAZTOL|508	509	BAZTOL	162.259
search3|BEBPEE|509	510	BEBPEE	156.983
search3|BEBPEE|510	511	BEBPEE	176.585
search3|BEBPEE|511	512	BEBPEE	169.108
search3|BEBPEE|512	513	BEBPEE	157.653
search3|BEBQOP|513	514	BEBQOP	159.519
search3|BEBQOP|514	515	BEBQOP	144.118
search3|BEBQUV|515	516	BEBQUV	161.406
search3|BEBQUV|516	517	BEBQUV	166.97
search3|BECMOL|517	518	BECMOL	157.25
search3|BECMOL|518	519	BECMOL	177.82
search3|BEFCIY|519	520	BEFCIY	161.985
search3|BEFCOE|520	521	BEFCOE	164.842
search3|BEFCOE|521	522	BEFCOE	154.305
search3|BEFDIZ01|522	523	BEFDIZ01	171.195
search3|BEFDIZ01|523	524	BEFDIZ01	174.875
search3|BEFDIZ02|524	525	BEFDIZ02	171.322
search3|BEHJAB|525	526	BEHJAB	175.777
search3|BEHKII|526	527	BEHKII	158.296
search3|BEJHAZ|527	528	BEJHAZ	176.427
search3|BEKLUY|528	529	BEKLUY	166.468
search3|BEKLUY|529	530	BEKLUY	171.069
search3|BEKPAI01|530	531	BEKPAI01	168.494
search3|BEMHOS|531	532	BEMHOS	173.495
search3|BEMXAU|532	533	BEMXAU	157.552
search3|BEMXOI|533	534	BEMXOI	168.213
search3|BENCEE|534	535	BENCEE	150.734
search3|BENXID|535	536	BENXID	143.343
search3|BEPCOO|536	537	BEPCOO	170.962
search3|BEPZAY|537	538	BEPZAY	150.656
search3|BEPZUS|538	539	BEPZUS	156.349
search3|BEQDUX|539	540	BEQDUX	166.622
search3|BEQFAF|540	541	BEQFAF	170.85
search3|BEQFAF|541	542	BEQFAF	176.78
search3|BEQFAF01|542	543	BEQFAF01	170.97
search3|BEQFAF01|543	544	BEQFAF01	176.937
search3|BEQFAF02|544	545	BEQFAF02	170.782
search3|BEQFAF02|545	546	BEQFAF02	177.079
search3|BEQQUK|546	547	BEQQUK	149.121
search3|BEQQUK|547	548	BEQQUK	162.687
search3|BEQQUK|548	549	BEQQUK	160.677
search3|BERSEW|549	550	BERSEW	158.713
search3|BERSEW|550	551	BERSEW	164.926
search3|BERSEW|551	552	BERSEW	165.388
search3|BERSEW|552	553	BERSEW	169.853
search3|BERSEW|553	554	BERSEW	171.69
search3|BERSEW|554	555	BERSEW	167.932
search3|BERSEW|555	556	BERSEW	165.325
search3|BERSEW|556	557	BERSEW	168.85
search3|BETTAV|557	558	BETTAV	132.837
search3|BETTAV|558	559	BETTAV	121.36
search3|BETTAV|559	560	BETTAV	143.127
search3|BEVMEV|560	561	BEVMEV	149.388
search3|BEXMEY|561	562	BEXMEY	174.48
search3|BEXMEY|562	563	BEXMEY	163.324
search3|BEXMIC|563	564	BEXMIC	163.774
search3|BEXMOI|564	565	BEXMOI	173.008
search3|BEXMUO|565	566	BEXMUO	163.428
search3|BEXNAV|566	567	BEXNAV	169.039
search3|BEXNAV|567	568	BEXNAV	165.133
search3|BEYZOU|568	569	BEYZOU	170.376
search3|BEYZOU|569	570	BEYZOU	179.511
search3|BEYZOU|570	571	BEYZOU	175.163
search3|BEYZOU|571	572	BEYZOU	175.017
search3|BEZCAK|572	573	BEZCAK	167.638
search3|BEZCAK|573	574	BEZCAK	172.696
search3|BEZFET|574	575	BEZFET	154.239
search3|BEZPUR|575	576	BEZPUR	166.792
search3|BEZQEC|576	577	BEZQEC	163.29
search3|BEZQEC|577	578	BEZQEC	165.043
search3|BEZQEC|578	579	BEZQEC	167.091
search3|BEZQEC|579	580	BEZQEC	156.12
search3|BEZQEC01|580	581	BEZQEC01	165.885
search3|BEZQEC02|581	582	BEZQEC02	169.286
search3|BEZQEC02|582	583	BEZQEC02	166.866
search3|BEZQEC02|583	584	BEZQEC02	161.878
search3|BEZQEC02|584	585	BEZQEC02	163.151
search3|BEZQEC03|585	586	BEZQEC03	170.577
search3|BEZQEC03|586	587	BEZQEC03	168.184
search3|BEZQEC03|587	588	BEZQEC03	159.397
search3|BEZQEC03|588	589	BEZQEC03	160.326
search3|BEZQEC04|589	590	BEZQEC04	166.343
search3|BEZQOM|590	591	BEZQOM	158.281
search3|BEZQOM|591	592	BEZQOM	161.505
search3|BEZRON|592	593	BEZRON	155.639
search3|BEZRON01|593	594	BEZRON01	158.063
search3|BEZRUT|594	595	BEZRUT	176.035
search3|BEZXIN|595	596	BEZXIN	174.431
search3|BEZXIN|596	597	BEZXIN	175.305
search3|BEZXIN|597	598	BEZXIN	176.241
search3|BIBGIE|598	599	BIBGIE	173.086
search3|BIBGOK|599	600	BIBGOK	173.509
search3|BICNIL|600	601	BICNIL	159.983
search3|BIFZIZ|601	602	BIFZIZ	171.351
search3|BIGFIH|602	603	BIGFIH	169.85
search3|BIJCUU|603	604	BIJCUU	149.867
search3|BIJKEM|604	605	BIJKEM	174.71
search3|BIJKIQ|605	606	BIJKIQ	166.805
search3|BIJKOW|606	607	BIJKOW	163.716
search3|BIKSEV|607	608	BIKSEV	172.373
search3|BIKSEV|608	609	BIKSEV	147.084
search3|BIKSEV|609	610	BIKSEV	168.205
search3|BIKSIZ|610	611	BIKSIZ	159.286
search3|BIKSIZ|611	612	BIKSIZ	162.371
search3|BIKSOF|612	613	BIKSOF	177.954
search3|BIKZUQ10|613	614	BIKZUQ10	145.141
search3|BILPES|614	615	BILPES	154.39
search3|BINHOV|615	616	BINHOV	174.288
search3|BINHOV|616	617	BINHOV	170.895
search3|BINSEW|617	618	BINSEW	165.747
search3|BINSEW|618	619	BINSEW	156.289
search3|BINXUR|619	620	BINXUR	170.684
search3|BINXUR|620	621	BINXUR	166.413
search3|BIRHIV|621	622	BIRHIV	169.55
search3|BIWCOZ|622	623	BIWCOZ	162.262
search3|BIWCOZ01|623	624	BIWCOZ01	160.967
search3|BIWCOZ02|624	625	BIWCOZ02	161.956
search3|BIWVIN|625	626	BIWVIN	142.947
search3|BIXHIB|626	627	BIXHIB	173.207
search3|BIXHIB|627	628	BIXHIB	170.392
search3|BIXHOH|628	629	BIXHOH	173.364
search3|BIXHOH|629	630	BIXHOH	167.387
search3|BIXHUN|630	631	BIXHUN	164.834
search3|BIXHUN|631	632	BIXHUN	170.989
search3|BIXJAV|632	633	BIXJAV	163.637
search3|BIXJAV|633	634	BIXJAV	169.77
search3|BIXJEZ|634	635	BIXJEZ	168.091
search3|BIXJEZ|635	636	BIXJEZ	172.182
search3|BIXJOJ|636	637	BIXJOJ	163.601
search3|BIXJOJ|637	638	BIXJOJ	162.538
search3|BIXTEH10|638	639	BIXTEH10	173.348
search3|BIXTIL10|639	640	BIXTIL10	164.656
search3|BIXTOR10|640	641	BIXTOR10	167.749
search3|BIXTUX10|641	642	BIXTUX10	162.443
search3|BIYFOF|642	643	BIYFOF	159.727
search3|BIYFUL|643	644	BIYFUL	159.461
search3|BIYYAK|644	645	BIYYAK	160.963
search3|BIYYAK|645	646	BIYYAK	168.107
search3|BIZBUI|646	647	BIZBUI	159.48
search3|BIZHID|647	648	BIZHID	161.821
search3|BIZHID|648	649	BIZHID	169.398
search3|BIZHID01|649	650	BIZHID01	154.42
search3|BIZHID01|650	651	BIZHID01	170.064
search3|BIZSIN|651	652	BIZSIN	168.532
search3|BOCXUO|652	653	BOCXUO	164.973
search3|BOCXUO|653	654	BOCXUO	163.892
search3|BOCXUO|654	655	BOCXUO	165.516
search3|BODFAB10|655	656	BODFAB10	152.575
search3|BODFAB10|656	657	BODFAB10	172.134
search3|BODLUC|657	658	BODLUC	167.559
search3|BODLUC|658	659	BODLUC	171.345
search3|BODLUC|659	660	BODLUC	169.529
search3|BODLUC|660	661	BODLUC	165.811
search3|BODWOH|661	662	BODWOH	160.776
search3|BOFLIT|662	663	BOFLIT	161.751
search3|BOFLOZ|663	664	BOFLOZ	154.129
search3|BOFLOZ|664	665	BOFLOZ	137.446
search3|BOFNAN|665	666	BOFNAN	162.495
search3|BOFNAN|666	667	BOFNAN	175.646
search3|BOGJIR|667	668	BOGJIR	165.792
search3|BOGJIR|668	669	BOGJIR	161.187
search3|BOGJIR|669	670	BOGJIR	161.553
search3|BOGJIR|670	671	BOGJIR	164.525
search3|BOGJOX|671	672	BOGJOX	171.119
search3|BOGJOX|672	673	BOGJOX	171.828
search3|BOGJOX|673	674	BOGJOX	173.272
search3|BOGJOX|674	675	BOGJOX	168.02
search3|BOGJOX|675	676	BOGJOX	158.606
search3|BOGJOX|676	677	BOGJOX	166.945
search3|BOGJOX|677	678	BOGJOX	170.377
search3|BOGJOX|678	679	BOGJOX	177.283
search3|BOGJOX|679	680	BOGJOX	164.383
search3|BOGJOX|680	681	BOGJOX	169.194
search3|BOGJOX|681	682	BOGJOX	157.013
search3|BOGJOX|682	683	BOGJOX	159.888
search3|BOGJUD|683	684	BOGJUD	174.909
search3|BOGJUD|684	685	BOGJUD	175.079
search3|BOHKIT|685	686	BOHKIT	155.828
search3|BOKSOK|686	687	BOKSOK	166.648
search3|BOKSOK|687	688	BOKSOK	159.291
search3|BOKSOK01|688	689	BOKSOK01	168.014
search3|BOKSOK01|689	690	BOKSOK01	157.335
search3|BOKSOK02|690	691	BOKSOK02	169.104
search3|BOKSOK02|691	692	BOKSOK02	159.582
search3|BOKSOK03|692	693	BOKSOK03	150.382
search3|BOLXOR|693	694	BOLXOR	162.871
search3|BOLXOR|694	695	BOLXOR	140.043
search3|BONHIV|695	696	BONHIV	177.588
search3|BONLEW|696	697	BONLEW	172.229
search3|BOQXEL|697	698	BOQXEL	177.526
search3|BOQXEL|698	699	BOQXEL	172.303
search3|BOQXEL|699	700	BOQXEL	176.977
search3|BOQXEL|700	701	BOQXEL	173.567
search3|BOQXEL|701	702	BOQXEL	176.588
search3|BOQXEL|702	703	BOQXEL	163.806
search3|BOQXEL|703	704	BOQXEL	175.851
search3|BOQXEL|704	705	BOQXEL	163.911
search3|BOWNIL|705	706	BOWNIL	157.017
search3|BOWNIL|706	707	BOWNIL	157.832
search3|BOWVIU|707	708	BOWVIU	169.463
search3|BOWVIU01|708	709	BOWVIU01	169.463
search3|BOWVOA|709	710	BOWVOA	168.883
search3|BOWVOA01|710	711	BOWVOA01	168.883
search3|BOXKUW|711	712	BOXKUW	173.848
search3|BOXKUW|712	713	BOXKUW	171.186
search3|BOXKUW|713	714	BOXKUW	172.852
search3|BOXKUW|714	715	BOXKUW	172.896
search3|BOXLAD|715	716	BOXLAD	173.062
search3|BOXLAD|716	717	BOXLAD	166.968
search3|BOXLAD|717	718	BOXLAD	171.653
search3|BOXLAD|718	719	BOXLAD	166.433
search3|BOYDIC|719	720	BOYDIC	176.073
search3|BOYDIC|720	721	BOYDIC	178.829
search3|BOYDOI|721	722	BOYDOI	177.65
search3|BOYQAH|722	723	BOYQAH	152.525
search3|BOYQAH01|723	724	BOYQAH01	152.281
search3|BOYQOV|724	725	BOYQOV	149.342
search3|BOYYEV|725	726	BOYYEV	161.615
search3|BOZCAW|726	727	BOZCAW	154.832
search3|BOZCAW|727	728	BOZCAW	171.318
search3|BOZCAW|728	729	BOZCAW	165.301
search3|BOZCAW|729	730	BOZCAW	162.882
search3|BOZCEA|730	731	BOZCEA	175.103
search3|BOZCEA|731	732	BOZCEA	172.262
search3|BOZCEA|732	733	BOZCEA	176.76
search3|BOZCEA|733	734	BOZCEA	169.112
search3|BPYMNA|734	735	BPYMNA	170.76
search3|BPYMNA|735	736	BPYMNA	152.02
search3|BPYMNA01|736	737	BPYMNA01	169.902
search3|BPYMNA01|737	738	BPYMNA01	156.901
search3|BPYMNB|738	739	BPYMNB	168.171
search3|BPYMNB|739	740	BPYMNB	161.947
search3|BUARET|740	741	BUARET	143.0
search3|BUARET|741	742	BUARET	138.95
search3|BUARET|742	743	BUARET	176.498
search3|BUARET|743	744	BUARET	165.49
search3|BUARET|744	745	BUARET	174.117
search3|BUARET|745	746	BUARET	171.049
search3|BUBBUX|746	747	BUBBUX	160.891
search3|BUCTUP|747	748	BUCTUP	156.719
search3|BUCVAX|748	749	BUCVAX	152.805
search3|BUCVEB|749	750	BUCVEB	162.778
search3|BUCVIF|750	751	BUCVIF	175.76
search3|BUCVIF|751	752	BUCVIF	164.114
search3|BUCVOL|752	753	BUCVOL	175.877
search3|BUCVOL|753	754	BUCVOL	164.313
search3|BUCWOL|754	755	BUCWOL	175.583
search3|BUFHAL|755	756	BUFHAL	166.33
search3|BUFHAL|756	757	BUFHAL	143.57
search3|BUJPAX|757	758	BUJPAX	167.009
search3|BUJPEB|758	759	BUJPEB	166.237
search3|BULTUX|759	760	BULTUX	167.646
search3|BULTUX|760	761	BULTUX	163.793
search3|BULXIQ|761	762	BULXIQ	164.001
search3|BUMVEK|762	763	BUMVEK	137.895
search3|BUNFUM|763	764	BUNFUM	164.383
search3|BUNFUM|764	765	BUNFUM	170.861
search3|BUNGEX|765	766	BUNGEX	162.066
search3|BUNGEX|766	767	BUNGEX	162.344
search3|BUNQUX|767	768	BUNQUX	169.127
search3|BUQMIJ01|768	769	BUQMIJ01	127.602
search3|BUQMIJ01|769	770	BUQMIJ01	174.515
search3|BUQMIJ01|770	771	BUQMIJ01	175.276
search3|BUQMOP|771	772	BUQMOP	164.363
search3|BUQMOP|772	773	BUQMOP	176.484
search3|BUQMOP01|773	774	BUQMOP01	176.541
search3|BUQMOP01|774	775	BUQMOP01	166.162
search3|BUQMOP01|775	776	BUQMOP01	167.349
search3|BUQMOP01|776	777	BUQMOP01	161.513
search3|BUQMOP01|777	778	BUQMOP01	169.132
search3|BUQMOP01|778	779	BUQMOP01	176.338
search3|BUQRUC|779	780	BUQRUC	164.653
search3|BUQVOZ|780	781	BUQVOZ	177.581
search3|BUQYUJ|781	782	BUQYUJ	168.469
search3|BURGIE|782	783	BURGIE	173.211
search3|BUSXIX|783	784	BUSXIX	167.908
search3|BUTDUQ|784	785	BUTDUQ	165.611
search3|BUTDUQ|785	786	BUTDUQ	158.626
search3|BUTFAY|786	787	BUTFAY	144.788
search3|BUTFAY|787	788	BUTFAY	155.361
search3|BUTFAY|788	789	BUTFAY	174.949
search3|BUTFAY|789	790	BUTFAY	150.791
search3|BUTKEG|790	791	BUTKEG	160.285
search3|BUTKEG|791	792	BUTKEG	167.298
search3|BUTYOG|792	793	BUTYOG	146.136
search3|BUWWUL|793	794	BUWWUL	171.86
search3|BUYCII|794	795	BUYCII	172.325
search3|BUYCII|795	796	BUYCII	165.523
search3|BUYCOO|796	797	BUYCOO	173.591
search3|BUYCUU|797	798	BUYCUU	174.96
search3|BUYDAB|798	799	BUYDAB	113.944
search3|BUYDAB|799	800	BUYDAB	167.495
search3|BUYDAB|800	801	BUYDAB	166.93
search3|BUYDEF|801	802	BUYDEF	168.711
search3|BUYDEF|802	803	BUYDEF	174.161
search3|BUYLIR|803	804	BUYLIR	161.596
search3|BUYLIR|804	805	BUYLIR	158.2
search3|BUYLIR|805	806	BUYLIR	172.003
search3|BUYYOK|806	807	BUYYOK	158.42
search3|BUYYOK|807	808	BUYYOK	165.438
search3|BUYYOK|808	809	BUYYOK	115.362
search3|BUYYOK|809	810	BUYYOK	109.17
search3|BUYYUQ|810	811	BUYYUQ	106.721
search3|BUYYUQ|811	812	BUYYUQ	154.065
search3|BUYYUQ|812	813	BUYYUQ	158.086
search3|BUYYUQ|813	814	BUYYUQ	109.99
search3|BUYYUQ01|814	815	BUYYUQ01	154.101
search3|BUYYUQ01|815	816	BUYYUQ01	106.802
search3|BUYYUQ01|816	817	BUYYUQ01	110.116
search3|BUYYUQ01|817	818	BUYYUQ01	158.143
search3|BXZPCO|818	819	BXZPCO	170.41
search3|BXZPCO|819	820	BXZPCO	167.598
search3|CABMOJ|820	821	CABMOJ	170.483
search3|CABMOJ|821	822	CABMOJ	168.564
search3|CACMOL|822	823	CACMOL	170.985
search3|CACMOL|823	824	CACMOL	164.256
search3|CACMOL|824	825	CACMOL	172.849
search3|CACMOL|825	826	CACMOL	165.6
search3|CACMUR|826	827	CACMUR	172.376
search3|CACMUR|827	828	CACMUR	158.274
search3|CACMUR|828	829	CACMUR	169.221
search3|CACMUR|829	830	CACMUR	172.524
search3|CACSAC|830	831	CACSAC	151.202
search3|CACSAC|831	832	CACSAC	166.328
search3|CADZAJ|832	833	CADZAJ	172.745
search3|CAFHAS|833	834	CAFHAS	143.39
search3|CAKKEE|834	835	CAKKEE	163.382
search3|CAKKEE10|835	836	CAKKEE10	164.399
search3|CALBEW|836	837	CALBEW	162.835
search3|CALBEW|837	838	CALBEW	171.318
search3|CAMFEB|838	839	CAMFEB	168.011
search3|CAMFEB|839	840	CAMFEB	166.535
search3|CAMFEB01|840	841	CAMFEB01	169.977
search3|CAMFEB01|841	842	CAMFEB01	163.209
search3|CAMFEB02|842	843	CAMFEB02	163.554
search3|CAMFEB02|843	844	CAMFEB02	165.091
search3|CAPWAR|844	845	CAPWAR	168.92
search3|CAPWIZ|845	846	CAPWIZ	173.024
search3|CAQHAE|846	847	CAQHAE	171.257
search3|CAQHEI|847	848	CAQHEI	154.328
search3|CAQHEI|848	849	CAQHEI	167.979
search3|CAQHEI|849	850	CAQHEI	175.453
search3|CAQHEI|850	851	CAQHEI	169.973
search3|CAQHEI|851	852	CAQHEI	174.994
search3|CAQHEI|852	853	CAQHEI	168.418
search3|CAQRAP|853	854	CAQRAP	174.478
search3|CAQRET|854	855	CAQRET	168.612
search3|CASBUT|855	856	CASBUT	176.695
search3|CASBUT|856	857	CASBUT	162.682
search3|CASBUT|857	858	CASBUT	172.608
search3|CASBUT|858	859	CASBUT	177.307
search3|CASLEN|859	860	CASLEN	140.78
search3|CASLEN|860	861	CASLEN	120.856
search3|CASLEN|861	862	CASLEN	166.02
search3|CASLEN10|862	863	CASLEN10	140.763
search3|CASLEN10|863	864	CASLEN10	120.869
search3|CASLEN10|864	865	CASLEN10	166.005
search3|CASLIR|865	866	CASLIR	168.254
search3|CASLIR|866	867	CASLIR	146.238
search3|CASLIR10|867	868	CASLIR10	167.837
search3|CASLIR10|868	869	CASLIR10	146.108
search3|CASLOX|869	870	CASLOX	159.737
search3|CASLOX|870	871	CASLOX	173.764
search3|CASLOX10|871	872	CASLOX10	173.565
search3|CASLOX10|872	873	CASLOX10	159.838
search3|CATHIP|873	874	CATHIP	166.505
search3|CATHOV|874	875	CATHOV	167.714
search3|CATLAL|875	876	CATLAL	171.16
search3|CATLAL|876	877	CATLAL	177.667
search3|CATLAL|877	878	CATLAL	175.019
search3|CATLIT|878	879	CATLIT	162.365
search3|CATLIT|879	880	CATLIT	171.951
search3|CATLIT|880	881	CATLIT	167.93
search3|CATPIW10|881	882	CATPIW10	169.262
search3|CATPIW10|882	883	CATPIW10	155.457
search3|CAXGAJ|883	884	CAXGAJ	162.781
search3|CAXGAJ|884	885	CAXGAJ	163.932
search3|CAXGAJ|885	886	CAXGAJ	175.718
search3|CAXGEN|886	887	CAXGEN	174.117
search3|CAXGEN|887	888	CAXGEN	164.459
search3|CAXGEN|888	889	CAXGEN	177.835
search3|CAXXOO|889	890	CAXXOO	161.925
search3|CAXXOO|890	891	CAXXOO	161.427
search3|CAYDAH|891	892	CAYDAH	138.017
search3|CAYQEZ|892	893	CAYQEZ	165.706
search3|CAYQEZ01|893	894	CAYQEZ01	163.756
search3|CBCNFF|894	895	CBCNFF	172.286
search3|CBYNPT|895	896	CBYNPT	174.799
search3|CDENIC|896	897	CDENIC	131.633
search3|CEBLUR|897	898	CEBLUR	170.229
search3|CEBLUR|898	899	CEBLUR	162.364
search3|CEBLUR01|899	900	CEBLUR01	166.344
search3|CEBMAY|900	901	CEBMAY	169.06
search3|CECVUD|901	902	CECVUD	161.64
search3|CECVUD|902	903	CECVUD	172.564
search3|CEDWIS|903	904	CEDWIS	176.148
search3|CEDXAL|904	905	CEDXAL	151.053
search3|CEDXEP|905	906	CEDXEP	151.504
search3|CEFHEC|906	907	CEFHEC	140.294
search3|CEFHIG|907	908	CEFHIG	166.766
search3|CEFHIG|908	909	CEFHIG	176.401
search3|CEFQOT|909	910	CEFQOT	165.62
search3|CEFQOT|910	911	CEFQOT	176.689
search3|CEFQOT|911	912	CEFQOT	146.48
search3|CEGXAO|912	913	CEGXAO	170.459
search3|CEJVOD|913	914	CEJVOD	156.825
search3|CEJVUJ|914	915	CEJVUJ	165.298
search3|CEJWAQ|915	916	CEJWAQ	159.403
search3|CEKCOK|916	917	CEKCOK	176.018
search3|CEKGEG|917	918	CEKGEG	180.0
search3|CEKGIK|918	919	CEKGIK	180.0
search3|CEKRER|919	920	CEKRER	135.66
search3|CEKRER|920	921	CEKRER	160.177
search3|CEKRER|921	922	CEKRER	172.43
search3|CELCUT|922	923	CELCUT	162.825
search3|CELCUT|923	924	CELCUT	165.553
search3|CENSUJ|924	925	CENSUJ	176.049
search3|CENWIB|925	926	CENWIB	172.097
search3|CENWIB|926	927	CENWIB	152.494
search3|CENWIB|927	928	CENWIB	156.228
search3|CENXIC|928	929	CENXIC	167.738
search3|CENXIC|929	930	CENXIC	157.22
search3|CENXIC|930	931	CENXIC	177.84
search3|CENXOI|931	932	CENXOI	161.552
search3|CENYOJ|932	933	CENYOJ	168.224
search3|CEPQUJ|933	934	CEPQUJ	177.936
search3|CEPQUJ|934	935	CEPQUJ	153.447
search3|CEPQUJ01|935	936	CEPQUJ01	151.009
search3|CEPQUJ01|936	937	CEPQUJ01	176.419
search3|CERDOT|937	938	CERDOT	176.492
search3|CERDOT|938	939	CERDOT	163.194
search3|CERDUZ|939	940	CERDUZ	162.352
search3|CERDUZ|940	941	CERDUZ	169.269
search3|CERFAH|941	942	CERFAH	168.266
search3|CERFAH|942	943	CERFAH	161.76
search3|CERFEL|943	944	CERFEL	170.162
search3|CERFEL|944	945	CERFEL	164.778
search3|CERFEL|945	946	CERFEL	173.638
search3|CERFEL|946	947	CERFEL	173.44
search3|CERFEL|947	948	CERFEL	170.454
search3|CERFEL|948	949	CERFEL	167.352
search3|CESTOK|949	950	CESTOK	157.057
search3|CETJAN|950	951	CETJAN	150.92
search3|CETKUH|951	952	CETKUH	177.026
search3|CETKUH|952	953	CETKUH	166.594
search3|CETRUO|953	954	CETRUO	162.852
search3|CEVGEP|954	955	CEVGEP	155.958
search3|CEVLAQ|955	956	CEVLAQ	173.973
search3|CEVNAT|956	957	CEVNAT	180.0
search3|CEVPUP|957	958	CEVPUP	167.01
search3|CEVYAE|958	959	CEVYAE	173.449
search3|CEVYAE|959	960	CEVYAE	174.763
search3|CEWFOB|960	961	CEWFOB	145.801
search3|CEWFOB|961	962	CEWFOB	154.057
search3|CEWFOB|962	963	CEWFOB	170.136
search3|CEWFOB|963	964	CEWFOB	169.301
search3|CEWFUH|964	965	CEWFUH	164.406
search3|CEWFUH|965	966	CEWFUH	176.542
search3|CEWGAO|966	967	CEWGAO	173.281
search3|CEXPEB|967	968	CEXPEB	155.306
search3|CEXPEB|968	969	CEXPEB	163.249
search3|CEYBIR|969	970	CEYBIR	162.079
search3|CEYBIR|970	971	CEYBIR	159.009
search3|CEYFAO|971	972	CEYFAO	176.138
search3|CEYFAO|972	973	CEYFAO	169.141
search3|CEZDAN|973	974	CEZDAN	180.0
search3|CEZDAN01|974	975	CEZDAN01	179.98
search3|CHOLRI|975	976	CHOLRI	166.657
search3|CIBDAT|976	977	CIBDAT	168.671
search3|CICHUS|977	978	CICHUS	169.093
search3|CICHUS|978	979	CICHUS	170.663
search3|CICRAJ|979	980	CICRAJ	144.803
search3|CICREN|980	981	CICREN	159.36
search3|CICREN|981	982	CICREN	160.693
search3|CICRIR|982	983	CICRIR	167.952
search3|CICRIR|983	984	CICRIR	165.125
search3|CICROX|984	985	CICROX	164.722
search3|CICROX01|985	986	CICROX01	163.71
search3|CICWAN|986	987	CICWAN	175.476
search3|CICWUH|987	988	CICWUH	178.066
search3|CICWUH|988	989	CICWUH	180.0
search3|CICWUH|989	990	CICWUH	175.155
search3|CICWUH|990	991	CICWUH	170.71
search3|CICWUH|991	992	CICWUH	170.39
search3|CICWUH|992	993	CICWUH	175.119
search3|CICWUH|993	994	CICWUH	174.556
search3|CICWUH|994	995	CICWUH	180.0
search3|CICWUH|995	996	CICWUH	177.677
search3|CICWUH|996	997	CICWUH	173.237
search3|CIDGEC|997	998	CIDGEC	180.0
search3|CIDQAI|998	999	CIDQAI	166.614
search3|CIDQAI|999	1000	CIDQAI	169.958
search3|CIDQEM|1000	1001	CIDQEM	175.388
search3|CIDQEM|1001	1002	CIDQEM	166.31
search3|CIDQEM|1002	1003	CIDQEM	169.442
search3|CIDQEM|1003	1004	CIDQEM	162.181
search3|CIDQEM|1004	1005	CIDQEM	154.345
search3|CIDQEM|1005	1006	CIDQEM	172.877
search3|CIDQEM|1006	1007	CIDQEM	173.02
search3|CIDQEM|1007	1008	CIDQEM	166.837
search3|CIDQEM|1008	1009	CIDQEM	175.435
search3|CIDQEM01|1009	1010	CIDQEM01	173.925
search3|CIDQEM01|1010	1011	CIDQEM01	153.146
search3|CIDQEM01|1011	1012	CIDQEM01	164.244
search3|CIDQEM01|1012	1013	CIDQEM01	173.96
search3|CIDQEM01|1013	1014	CIDQEM01	163.269
search3|CIDQEM01|1014	1015	CIDQEM01	172.535
search3|CIDQEM01|1015	1016	CIDQEM01	169.001
search3|CIDQEM01|1016	1017	CIDQEM01	165.978
search3|CIDQEM01|1017	1018	CIDQEM01	175.39
search3|CIFBAW|1018	1019	CIFBAW	177.735
search3|CIFBEA|1019	1020	CIFBEA	175.058
search3|CIFBEA|1020	1021	CIFBEA	176.866
search3|CIFYUM|1021	1022	CIFYUM	170.302
search3|CIFYUM|1022	1023	CIFYUM	152.383
search3|CIFZAT|1023	1024	CIFZAT	170.114
search3|CIFZAT|1024	1025	CIFZAT	155.353
search3|CIGBAX|1025	1026	CIGBAX	171.499
search3|CIGBAX|1026	1027	CIGBAX	171.923
search3|CIGBAX|1027	1028	CIGBAX	171.244
search3|CIGBAX|1028	1029	CIGBAX	175.049
search3|CIGBAX|1029	1030	CIGBAX	166.925
search3|CIGBAX|1030	1031	CIGBAX	170.23
search3|CIGBAX|1031	1032	CIGBAX	163.588
search3|CIGBAX|1032	1033	CIGBAX	165.895
search3|CIGBAX|1033	1034	CIGBAX	165.314
search3|CIGBAX|1034	1035	CIGBAX	163.378
search3|CIGBAX|1035	1036	CIGBAX	169.512
search3|CIGBAX|1036	1037	CIGBAX	168.528
search3|CIGVOD|1037	1038	CIGVOD	168.531
search3|CIGVOD|1038	1039	CIGVOD	153.244
search3|CIHYOJ|1039	1040	CIHYOJ	132.291
search3|CIHYOJ|1040	1041	CIHYOJ	151.824
search3|CIHYOJ|1041	1042	CIHYOJ	164.256
search3|CIJDEE|1042	1043	CIJDEE	166.893
search3|CIJDEE|1043	1044	CIJDEE	169.957
search3|CIJDEE|1044	1045	CIJDEE	172.798
search3|CIJDEE|1045	1046	CIJDEE	160.44
search3|CIJDEE|1046	1047	CIJDEE	175.889
search3|CIJDEE|1047	1048	CIJDEE	166.926
search3|CIJDEE|1048	1049	CIJDEE	167.934
search3|CIJDEE|1049	1050	CIJDEE	166.141
search3|CIKGUZ|1050	1051	CIKGUZ	159.387
search3|CIKHAG|1051	1052	CIKHAG	171.838
search3|CIKHAG|1052	1053	CIKHAG	166.247
search3|CIKJUB|1053	1054	CIKJUB	170.242
search3|CIKJUB|1054	1055	CIKJUB	161.688
search3|CIKJUB|1055	1056	CIKJUB	160.931
search3|CILDUW|1056	1057	CILDUW	167.923
search3|CILDUW|1057	1058	CILDUW	175.22
search3|CINBAE|1058	1059	CINBAE	165.816
search3|CINBAE|1059	1060	CINBAE	171.048
search3|CINDEK|1060	1061	CINDEK	168.754
search3|CINDEK|1061	1062	CINDEK	161.757
search3|CIPREZ|1062	1063	CIPREZ	159.499
search3|CIPRID|1063	1064	CIPRID	157.17
search3|CISHES|1064	1065	CISHES	177.938
search3|CISHES|1065	1066	CISHES	151.781
search3|CISHIW|1066	1067	CISHIW	165.876
search3|CISMIB|1067	1068	CISMIB	164.154
search3|CITGET|1068	1069	CITGET	140.333
search3|CITGET|1069	1070	CITGET	140.51
search3|CITHIX|1070	1071	CITHIX	154.249
search3|CITHIX|1071	1072	CITHIX	147.805
search3|CITHIX01|1072	1073	CITHIX01	171.859
search3|CITYUA|1073	1074	CITYUA	177.813
search3|CITYUA|1074	1075	CITYUA	159.402
search3|CITYUA|1075	1076	CITYUA	168.878
search3|CITYUA|1076	1077	CITYUA	166.233
search3|CIVJEW10|1077	1078	CIVJEW10	162.962
search3|CIVJIA20|1078	1079	CIVJIA20	164.081
search3|CIVJIA20|1079	1080	CIVJIA20	161.954
search3|CIVJOG01|1080	1081	CIVJOG01	168.483
search3|CIVJOG01|1081	1082	CIVJOG01	167.996
search3|CIVJOG01|1082	1083	CIVJOG01	168.078
search3|CIVJOG01|1083	1084	CIVJOG01	167.412
search3|CIVJOG02|1084	1085	CIVJOG02	167.94
search3|CIVJUM01|1085	1086	CIVJUM01	164.092
search3|CIVJUM01|1086	1087	CIVJUM01	167.222
search3|CIVJUM01|1087	1088	CIVJUM01	164.102
search3|CIVJUM01|1088	1089	CIVJUM01	162.768
search3|CIVJUM02|1089	1090	CIVJUM02	166.426
search3|CIVKAT10|1090	1091	CIVKAT10	180.0
search3|CIVRAC|1091	1092	CIVRAC	160.382
search3|CIVRAC01|1092	1093	CIVRAC01	160.382
search3|CIWWEL|1093	1094	CIWWEL	168.956
search3|CIWWEL|1094	1095	CIWWEL	176.245
search3|CIWWEL|1095	1096	CIWWEL	168.501
search3|CIXSEJ|1096	1097	CIXSEJ	168.179
search3|CIXSEJ|1097	1098	CIXSEJ	176.44
search3|CIZFOG|1098	1099	CIZFOG	169.467
search3|CIZFOG01|1099	1100	CIZFOG01	169.468
search3|CLPOMN10|1100	1101	CLPOMN10	161.825
search3|CLTCUB10|1101	1102	CLTCUB10	122.645
search3|CNBONI|1102	1103	CNBONI	162.398
search3|CNBONI|1103	1104	CNBONI	138.243
search3|CNENCP|1104	1105	CNENCP	165.144
search3|CNENCP|1105	1106	CNENCP	173.342
search3|CNSPYN01|1106	1107	CNSPYN01	156.214
search3|CNSPYN02|1107	1108	CNSPYN02	156.272
search3|CNSPYN03|1108	1109	CNSPYN03	156.902
search3|CNSPYN04|1109	1110	CNSPYN04	175.827
search3|CNSPYN05|1110	1111	CNSPYN05	156.585
search3|COAETC10|1111	1112	COAETC10	172.868
search3|COAETC10|1112	1113	COAETC10	161.032
search3|COCKAH|1113	1114	COCKAH	167.495
search3|COCKUA|1114	1115	COCKUA	159.458
search3|COCLIQ|1115	1116	COCLIQ	164.647
search3|COCLOW|1116	1117	COCLOW	159.393
search3|COCLOW|1117	1118	COCLOW	143.855
search3|CODBED|1118	1119	CODBED	164.224
search3|CODBED|1119	1120	CODBED	171.174
search3|COFNIW|1120	1121	COFNIW	174.254
search3|COFNIW|1121	1122	COFNIW	166.022
search3|COFNIW|1122	1123	COFNIW	168.53
search3|COFZIG|1123	1124	COFZIG	165.41
search3|COFZIG|1124	1125	COFZIG	170.529
search3|COGLAM|1125	1126	COGLAM	175.065
search3|COGLAM|1126	1127	COGLAM	159.503
search3|COGLEQ|1127	1128	COGLEQ	173.788
search3|COGLIU|1128	1129	COGLIU	172.335
search3|COGSAS|1129	1130	COGSAS	170.328
search3|COGSIC|1130	1131	COGSIC	170.718
search3|COHGPY|1131	1132	COHGPY	177.095
search3|COHGPY|1132	1133	COHGPY	163.947
search3|COHHEM|1133	1134	COHHEM	179.948
search3|COHHEM|1134	1135	COHHEM	179.972
search3|COHHIQ|1135	1136	COHHIQ	142.777
search3|COHHIQ|1136	1137	COHHIQ	157.739
search3|COKHAL|1137	1138	COKHAL	167.455
search3|COKHAL|1138	1139	COKHAL	170.399
search3|COLTED|1139	1140	COLTED	160.849
search3|COLTED|1140	1141	COLTED	161.827
search3|COMQUR|1141	1142	COMQUR	166.884
search3|COMQUR|1142	1143	COMQUR	159.735
search3|COMQUR01|1143	1144	COMQUR01	172.389
search3|COMQUR01|1144	1145	COMQUR01	166.355
search3|CONNPM|1145	1146	CONNPM	168.959
search3|CONNPM|1146	1147	CONNPM	176.007
search3|CONTIJ|1147	1148	CONTIJ	165.292
search3|CONTOP|1148	1149	CONTOP	163.676
search3|CONTOP|1149	1150	CONTOP	171.817
search3|COQHUM|1150	1151	COQHUM	147.875
search3|COQHUM|1151	1152	COQHUM	170.938
search3|COQJAU|1152	1153	COQJAU	170.852
search3|COQJEY|1153	1154	COQJEY	170.219
search3|COQJIC|1154	1155	COQJIC	174.974
search3|COQJIC|1155	1156	COQJIC	172.047
search3|CORJIC|1156	1157	CORJIC	168.609
search3|COSCPY01|1157	1158	COSCPY01	165.851
search3|COSCPY01|1158	1159	COSCPY01	165.713
search3|COTGUN|1159	1160	COTGUN	163.917
search3|COTGUN|1160	1161	COTGUN	152.298
search3|COTHEY|1161	1162	COTHEY	159.961
search3|COTHEY|1162	1163	COTHEY	173.45
search3|COTNAT10|1163	1164	COTNAT10	173.144
search3|COTNAT10|1164	1165	COTNAT10	166.269
search3|COTWUE|1165	1166	COTWUE	167.389
search3|COTWUE|1166	1167	COTWUE	175.718
search3|COTWUE|1167	1168	COTWUE	174.365
search3|COTWUE|1168	1169	COTWUE	173.172
search3|COVMAD|1169	1170	COVMAD	153.967
search3|COVMAD|1170	1171	COVMAD	148.804
search3|COWTOZ|1171	1172	COWTOZ	165.921
search3|COWTOZ|1172	1173	COWTOZ	165.096
search3|COWTOZ|1173	1174	COWTOZ	163.543
search3|COWTUF|1174	1175	COWTUF	164.749
search3|COWTUF|1175	1176	COWTUF	163.861
search3|COWVAN|1176	1177	COWVAN	165.637
search3|COWVAN|1177	1178	COWVAN	165.202
search3|COWVER|1178	1179	COWVER	156.226
search3|COWVIV|1179	1180	COWVIV	159.822
search3|COWVOB|1180	1181	COWVOB	165.357
search3|COWVOB|1181	1182	COWVOB	177.77
search3|COWVUH|1182	1183	COWVUH	160.187
search3|COXPAG|1183	1184	COXPAG	158.491
search3|COXPAG|1184	1185	COXPAG	161.817
search3|COXPEK|1185	1186	COXPEK	155.681
search3|COYBUO|1186	1187	COYBUO	171.782
search3|COYBUO|1187	1188	COYBUO	177.205
search3|COYCAV|1188	1189	COYCAV	148.124
search3|COYCAV|1189	1190	COYCAV	155.785
search3|COYCAV|1190	1191	COYCAV	175.122
search3|COYCAV|1191	1192	COYCAV	160.169
search3|COYCEZ|1192	1193	COYCEZ	174.559
search3|COYCID|1193	1194	COYCID	172.291
search3|COYKOQ10|1194	1195	COYKOQ10	171.284
search3|COYZUL|1195	1196	COYZUL	163.698
search3|COZBEZ|1196	1197	COZBEZ	164.074
search3|COZHOP|1197	1198	COZHOP	176.274
search3|COZTUH|1198	1199	COZTUH	165.493
search3|COZVAP|1199	1200	COZVAP	170.877
search3|COZVET|1200	1201	COZVET	156.648
search3|COZVET|1201	1202	COZVET	170.256
search3|COZVIX|1202	1203	COZVIX	171.089
search3|CPCIFE|1203	1204	CPCIFE	169.658
search3|CPCIFE01|1204	1205	CPCIFE01	178.847
search3|CPITTI|1205	1206	CPITTI	177.498
search3|CUBWUR|1206	1207	CUBWUR	176.146
search3|CUBWUR|1207	1208	CUBWUR	171.844
search3|CUBXAY|1208	1209	CUBXAY	172.904
search3|CUBXAY|1209	1210	CUBXAY	171.241
search3|CUCRAT|1210	1211	CUCRAT	164.094
search3|CUCRAT|1211	1212	CUCRAT	163.18
search3|CUDSEA|1212	1213	CUDSEA	163.176
search3|CUDSEA|1213	1214	CUDSEA	162.863
search3|CUGZOT|1214	1215	CUGZOT	166.623
search3|CUHBEM|1215	1216	CUHBEM	173.372
search3|CUHBIQ|1216	1217	CUHBIQ	172.42
search3|CUHCUF|1217	1218	CUHCUF	168.347
search3|CUHCUF|1218	1219	CUHCUF	174.256
search3|CUJTIL|1219	1220	CUJTIL	176.618
search3|CUKGAS|1220	1221	CUKGAS	166.608
search3|CUKNOL|1221	1222	CUKNOL	157.36
search3|CUKNOL|1222	1223	CUKNOL	156.155
search3|CUKNOL|1223	1224	CUKNOL	149.857
search3|CUKNOL|1224	1225	CUKNOL	154.529
search3|CUKNOL|1225	1226	CUKNOL	174.07
search3|CUKNOL|1226	1227	CUKNOL	156.449
search3|CUKNOL|1227	1228	CUKNOL	153.52
search3|CUKNOL|1228	1229	CUKNOL	156.7
search3|CULLOK10|1229	1230	CULLOK10	165.333
search3|CULLOK10|1230	1231	CULLOK10	171.316
search3|CULLUQ10|1231	1232	CULLUQ10	171.568
search3|CULLUQ10|1232	1233	CULLUQ10	175.234
search3|CUMHUN|1233	1234	CUMHUN	157.107
search3|CUMHUN|1234	1235	CUMHUN	174.706
search3|CUMHUN|1235	1236	CUMHUN	169.257
search3|CUMHUN|1236	1237	CUMHUN	162.477
search3|CUMHUN|1237	1238	CUMHUN	160.723
search3|CUMHUN|1238	1239	CUMHUN	170.201
search3|CUMHUN01|1239	1240	CUMHUN01	169.33
search3|CUMHUN01|1240	1241	CUMHUN01	164.501
search3|CUMHUN01|1241	1242	CUMHUN01	171.025
search3|CUMHUN01|1242	1243	CUMHUN01	167.711
search3|CUMHUN01|1243	1244	CUMHUN01	157.305
search3|CUMHUN01|1244	1245	CUMHUN01	156.523
search3|CUMHUN01|1245	1246	CUMHUN01	172.483
search3|CUMHUN01|1246	1247	CUMHUN01	164.802
search3|CUMHUN01|1247	1248	CUMHUN01	163.647
search3|CUMHUN01|1248	1249	CUMHUN01	166.568
search3|CUMHUN01|1249	1250	CUMHUN01	170.681
search3|CUMHUN01|1250	1251	CUMHUN01	177.181
search3|CUMWAJ|1251	1252	CUMWAJ	148.215
search3|CUMWAJ|1252	1253	CUMWAJ	166.913
search3|CUMWAJ|1253	1254	CUMWAJ	157.362
search3|CUMWAJ|1254	1255	CUMWAJ	163.867
search3|CUMWIR|1255	1256	CUMWIR	165.468
search3|CUMWIR|1256	1257	CUMWIR	167.484
search3|CUMXAK|1257	1258	CUMXAK	178.759
search3|CUMXAK|1258	1259	CUMXAK	173.663
search3|CUPCEV|1259	1260	CUPCEV	175.17
search3|CURMUY|1260	1261	CURMUY	171.527
search3|CURPUA|1261	1262	CURPUA	171.596
search3|CURPUA|1262	1263	CURPUA	166.228
search3|CURQIR|1263	1264	CURQIR	162.786
search3|CUSCOI|1264	1265	CUSCOI	168.611
search3|CUSVOC|1265	1266	CUSVOC	159.168
search3|CUSVOC|1266	1267	CUSVOC	146.463
search3|CUSVOC01|1267	1268	CUSVOC01	170.836
search3|CUSVOC01|1268	1269	CUSVOC01	156.961
search3|CUSVUI|1269	1270	CUSVUI	178.328
search3|CUTATE10|1270	1271	CUTATE10	163.29
search3|CUTETS10|1271	1272	CUTETS10	151.546
search3|CUTETS11|1272	1273	CUTETS11	159.832
search3|CUXKAJ|1273	1274	CUXKAJ	161.303
search3|CUYLAK|1274	1275	CUYLAK	170.519
search3|CUYLAK|1275	1276	CUYLAK	153.515
search3|CUYLAK|1276	1277	CUYLAK	176.828
search3|CUYLAK|1277	1278	CUYLAK	175.084
search3|CUYLAK|1278	1279	CUYLAK	165.424
search3|CUYLAK|1279	1280	CUYLAK	162.388
search3|CUYMIT|1280	1281	CUYMIT	159.06
search3|CUYMIT|1281	1282	CUYMIT	168.194
search3|CUYMIT|1282	1283	CUYMIT	170.133
search3|CUYMOZ|1283	1284	CUYMOZ	152.829
search3|CUYMOZ|1284	1285	CUYMOZ	167.201
search3|CUYMOZ|1285	1286	CUYMOZ	170.85
search3|DACZUD|1286	1287	DACZUD	174.152
search3|DADDIX|1287	1288	DADDIX	167.849
search3|DADFAR|1288	1289	DADFAR	161.458
search3|DADFAR01|1289	1290	DADFAR01	163.687
search3|DADFAR02|1290	1291	DADFAR02	163.384
search3|DADGIA|1291	1292	DADGIA	158.783
search3|DAHYAO|1292	1293	DAHYAO	159.337
search3|DAHYAO|1293	1294	DAHYAO	165.681
search3|DAHZAP|1294	1295	DAHZAP	152.102
search3|DAHZAP|1295	1296	DAHZAP	168.929
search3|DALDEA|1296	1297	DALDEA	172.067
search3|DALDEA|1297	1298	DALDEA	161.474
search3|DALDEA|1298	1299	DALDEA	171.519
search3|DALDEA|1299	1300	DALDEA	166.59
search3|DALDEA|1300	1301	DALDEA	171.307
search3|DALDEA|1301	1302	DALDEA	162.896
search3|DALDEA01|1302	1303	DALDEA01	170.752
search3|DALDEA01|1303	1304	DALDEA01	158.723
search3|DALDEA01|1304	1305	DALDEA01	168.441
search3|DALDEA01|1305	1306	DALDEA01	164.835
search3|DALDEA01|1306	1307	DALDEA01	170.47
search3|DALDEA01|1307	1308	DALDEA01	158.601
search3|DALREN|1308	1309	DALREN	169.623
search3|DALRIR|1309	1310	DALRIR	167.621
search3|DALROX|1310	1311	DALROX	163.946
search3|DAMYUL|1311	1312	DAMYUL	152.127
search3|DANTAP|1312	1313	DANTAP	152.335
search3|DANTAP|1313	1314	DANTAP	161.074
search3|DAPRCW|1314	1315	DAPRCW	120.643
search3|DAPSMO|1315	1316	DAPSMO	172.881
search3|DAPSMO|1316	1317	DAPSMO	159.887
search3|DARBAB|1317	1318	DARBAB	173.12
search3|DASFEB|1318	1319	DASFEB	179.232
search3|DATKEP|1319	1320	DATKEP	171.271
search3|DAWTOL|1320	1321	DAWTOL	162.42
search3|DAWTOL|1321	1322	DAWTOL	173.235
search3|DAXBIO|1322	1323	DAXBIO	164.38
search3|DAXBIO|1323	1324	DAXBIO	167.724
search3|DAXBIO|1324	1325	DAXBIO	171.854
search3|DAXBIO|1325	1326	DAXBIO	176.779
search3|DAYREB|1326	1327	DAYREB	138.998
search3|DAYSAY|1327	1328	DAYSAY	167.913
search3|DAYSAY|1328	1329	DAYSAY	160.759
search3|DAZHAO|1329	1330	DAZHAO	169.318
search3|DAZHAO|1330	1331	DAZHAO	167.808
search3|DAZHAO|1331	1332	DAZHAO	169.788
search3|DAZYEI|1332	1333	DAZYEI	177.592
search3|DAZYEI01|1333	1334	DAZYEI01	178.083
search3|DEBQOS|1334	1335	DEBQOS	164.598
search3|DEBQOS|1335	1336	DEBQOS	149.542
search3|DEBQOS|1336	1337	DEBQOS	171.945
search3|DEBQOS|1337	1338	DEBQOS	166.103
search3|DEBXEP|1338	1339	DEBXEP	154.93
search3|DECFEX|1339	1340	DECFEX	163.299
search3|DECMAZ|1340	1341	DECMAZ	161.061
search3|DECXAL|1341	1342	DECXAL	148.495
search3|DECXAL01|1342	1343	DECXAL01	152.964
search3|DECXEP|1343	1344	DECXEP	146.665
search3|DEDFUN|1344	1345	DEDFUN	174.481
search3|DEDFUN|1345	1346	DEDFUN	177.799
search3|DEDFUN|1346	1347	DEDFUN	167.419
search3|DEDFUN|1347	1348	DEDFUN	175.056
search3|DEDFUN10|1348	1349	DEDFUN10	174.426
search3|DEDFUN10|1349	1350	DEDFUN10	177.857
search3|DEDFUN10|1350	1351	DEDFUN10	167.368
search3|DEDFUN10|1351	1352	DEDFUN10	174.923
search3|DEDLUV|1352	1353	DEDLUV	163.969
search3|DEDMAC|1353	1354	DEDMAC	164.234
search3|DEDMAC|1354	1355	DEDMAC	160.015
search3|DEDMEG|1355	1356	DEDMEG	176.181
search3|DEFGOK|1356	1357	DEFGOK	164.901
search3|DEFHAZ|1357	1358	DEFHAZ	159.43
search3|DEFHAZ|1358	1359	DEFHAZ	170.601
search3|DEFKAA|1359	1360	DEFKAA	149.536
search3|DEFWIU|1360	1361	DEFWIU	173.883
search3|DEFWOA|1361	1362	DEFWOA	175.666
search3|DEHGIG|1362	1363	DEHGIG	174.668
search3|DELFUV|1363	1364	DELFUV	177.382
search3|DELFUV|1364	1365	DELFUV	165.399
search3|DELFUV|1365	1366	DELFUV	178.525
search3|DELHUY|1366	1367	DELHUY	168.662
search3|DELHUY|1367	1368	DELHUY	169.209
search3|DELHUY01|1368	1369	DELHUY01	175.062
search3|DELHUY02|1369	1370	DELHUY02	169.021
search3|DELVUM|1370	1371	DELVUM	174.058
search3|DELVUM|1371	1372	DELVUM	173.285
search3|DEMHAE|1372	1373	DEMHAE	173.76
search3|DEMHAE|1373	1374	DEMHAE	151.675
search3|DEMHAE10|1374	1375	DEMHAE10	172.42
search3|DEMHAE10|1375	1376	DEMHAE10	149.255
search3|DEMHEI|1376	1377	DEMHEI	173.583
search3|DEMHEI|1377	1378	DEMHEI	142.537
search3|DEMHEI10|1378	1379	DEMHEI10	171.704
search3|DEMHEI10|1379	1380	DEMHEI10	141.048
search3|DEMHIM|1380	1381	DEMHIM	173.218
search3|DEMHIM10|1381	1382	DEMHIM10	173.218
search3|DENTZN10|1382	1383	DENTZN10	159.226
search3|DENTZN10|1383	1384	DENTZN10	149.199
search3|DENVUO|1384	1385	DENVUO	162.343
search3|DEPKOY|1385	1386	DEPKOY	158.225
search3|DEPKOY|1386	1387	DEPKOY	175.66
search3|DESCIN|1387	1388	DESCIN	171.518
search3|DESSOK|1388	1389	DESSOK	173.249
search3|DETQIC|1389	1390	DETQIC	144.668
search3|DETQIC|1390	1391	DETQIC	161.448
search3|DETQIC|1391	1392	DETQIC	153.346
search3|DETQIC|1392	1393	DETQIC	169.992
search3|DETQIC|1393	1394	DETQIC	175.265
search3|DETQIC|1394	1395	DETQIC	175.864
search3|DETQOI|1395	1396	DETQOI	145.241
search3|DETQOI|1396	1397	DETQOI	147.965
search3|DETQUO|1397	1398	DETQUO	177.412
search3|DETQUO|1398	1399	DETQUO	173.382
search3|DETQUO|1399	1400	DETQUO	176.112
search3|DETQUO|1400	1401	DETQUO	166.648
search3|DETQUO|1401	1402	DETQUO	169.002
search3|DETQUO|1402	1403	DETQUO	163.148
search3|DEWDEO|1403	1404	DEWDEO	160.683
search3|DEWDEO|1404	1405	DEWDEO	172.65
search3|DEWDEO|1405	1406	DEWDEO	145.23
search3|DEWDIS|1406	1407	DEWDIS	168.583
search3|DEWDOY|1407	1408	DEWDOY	170.76
search3|DEXLIC|1408	1409	DEXLIC	175.538
search3|DEXLIC|1409	1410	DEXLIC	173.483
search3|DEXSAB|1410	1411	DEXSAB	163.001
search3|DEXSAB|1411	1412	DEXSAB	163.83
search3|DEXYIO10|1412	1413	DEXYIO10	142.701
search3|DEXYIO10|1413	1414	DEXYIO10	152.894
search3|DEXYIO10|1414	1415	DEXYIO10	157.096
search3|DEXYIO10|1415	1416	DEXYIO10	153.007
search3|DEXYIO10|1416	1417	DEXYIO10	140.132
search3|DEXYIO10|1417	1418	DEXYIO10	144.114
search3|DEXYIO11|1418	1419	DEXYIO11	150.916
search3|DEYDIW|1419	1420	DEYDIW	163.354
search3|DEYDIW01|1420	1421	DEYDIW01	174.317
search3|DEYDIW01|1421	1422	DEYDIW01	159.868
search3|DEYDUI|1422	1423	DEYDUI	164.835
search3|DEYDUI01|1423	1424	DEYDUI01	162.378
search3|DEYDUI01|1424	1425	DEYDUI01	174.787
search3|DEYDUI02|1425	1426	DEYDUI02	165.634
search3|DEYFEU|1426	1427	DEYFEU	165.753
search3|DEYFIY|1427	1428	DEYFIY	167.458
search3|DEYFOE|1428	1429	DEYFOE	161.113
search3|DEYFOE|1429	1430	DEYFOE	177.023
search3|DEYGAR|1430	1431	DEYGAR	163.833
search3|DEYGAR|1431	1432	DEYGAR	177.313
search3|DEYXEK|1432	1433	DEYXEK	151.024
search3|DEYXEK|1433	1434	DEYXEK	158.077
search3|DEYZUD|1434	1435	DEYZUD	171.012
search3|DEZJAV|1435	1436	DEZJAV	176.541
search3|DEZJAV|1436	1437	DEZJAV	164.044
search3|DEZJAV|1437	1438	DEZJAV	161.077
search3|DEZJEZ|1438	1439	DEZJEZ	175.462
search3|DEZJEZ|1439	1440	DEZJEZ	161.967
search3|DEZJEZ|1440	1441	DEZJEZ	162.345
search3|DIBKAC|1441	1442	DIBKAC	174.516
search3|DIBKAC|1442	1443	DIBKAC	161.164
search3|DIBKAC|1443	1444	DIBKAC	159.966
search3|DIBKEG|1444	1445	DIBKEG	174.726
search3|DIBKEG|1445	1446	DIBKEG	171.156
search3|DICPPD|1446	1447	DICPPD	170.913
search3|DICTIU|1447	1448	DICTIU	174.705
search3|DICZEZ|1448	1449	DICZEZ	170.886
search3|DICZEZ|1449	1450	DICZEZ	170.68
search3|DICZEZ|1450	1451	DICZEZ	167.652
search3|DICZEZ|1451	1452	DICZEZ	166.186
search3|DIDDEB|1452	1453	DIDDEB	167.12
search3|DIDQEO|1453	1454	DIDQEO	155.865
search3|DIDQEO|1454	1455	DIDQEO	116.611
search3|DIDQIS|1455	1456	DIDQIS	163.646
search3|DIDYUL|1456	1457	DIDYUL	162.723
search3|DIFXEX|1457	1458	DIFXEX	148.123
search3|DIGMUB|1458	1459	DIGMUB	172.886
search3|DIHQOC|1459	1460	DIHQOC	162.55
search3|DIHQOC|1460	1461	DIHQOC	176.553
search3|DIKXUQ|1461	1462	DIKXUQ	180.0
search3|DILBEG|1462	1463	DILBEG	174.555
search3|DILBEG|1463	1464	DILBEG	166.217
search3|DILBEG|1464	1465	DILBEG	178.941
search3|DILDOS|1465	1466	DILDOS	164.168
search3|DIMKUF10|1466	1467	DIMKUF10	175.171
search3|DIMSID|1467	1468	DIMSID	163.773
search3|DINPAT|1468	1469	DINPAT	170.498
search3|DINPAT|1469	1470	DINPAT	176.269
search3|DINPAT|1470	1471	DINPAT	176.229
search3|DINPAT|1471	1472	DINPAT	168.557
search3|DIRLIZ|1472	1473	DIRLIZ	157.074
search3|DIRPOJ|1473	1474	DIRPOJ	164.084
search3|DIRPOJ|1474	1475	DIRPOJ	172.522
search3|DISKOF|1475	1476	DISKOF	168.11
search3|DISKOF|1476	1477	DISKOF	170.535
search3|DISKOF|1477	1478	DISKOF	176.854
search3|DISKOF|1478	1479	DISKOF	174.791
search3|DISQAX|1479	1480	DISQAX	170.146
search3|DISQAX|1480	1481	DISQAX	169.471
search3|DISYAG|1481	1482	DISYAG	169.646
search3|DITVOR|1482	1483	DITVOR	165.112
search3|DITVOR|1483	1484	DITVOR	162.473
search3|DITVOR|1484	1485	DITVOR	156.222
search3|DITVOR|1485	1486	DITVOR	168.161
search3|DITWAE|1486	1487	DITWAE	146.171
search3|DITWAE|1487	1488	DITWAE	160.155
search3|DITZIP|1488	1489	DITZIP	137.848
search3|DITZIP|1489	1490	DITZIP	132.016
search3|DITZOV|1490	1491	DITZOV	129.901
search3|DITZOV|1491	1492	DITZOV	152.764
search3|DIVCAO|1492	1493	DIVCAO	176.602
search3|DIWCAN|1493	1494	DIWCAN	170.359
search3|DIWCAN|1494	1495	DIWCAN	175.581
search3|DIYROU|1495	1496	DIYROU	149.194
search3|DIYRUA|1496	1497	DIYRUA	153.814
search3|DIYRUA|1497	1498	DIYRUA	155.384
search3|DIYSAH|1498	1499	DIYSAH	154.768
search3|DIYSEL|1499	1500	DIYSEL	151.619
search3|DIYSEL|1500	1501	DIYSEL	155.551
search3|DIYXUE|1501	1502	DIYXUE	154.631
search3|DOCDUV|1502	1503	DOCDUV	177.459
search3|DOCDUV|1503	1504	DOCDUV	169.518
search3|DOCFAD|1504	1505	DOCFAD	177.62
search3|DOCFAD|1505	1506	DOCFAD	170.004
search3|DOCFEH|1506	1507	DOCFEH	167.783
search3|DOCFEH|1507	1508	DOCFEH	175.677
search3|DOCXUP|1508	1509	DOCXUP	155.433
search3|DODHEJ|1509	1510	DODHEJ	175.537
search3|DOHGAJ|1510	1511	DOHGAJ	173.631
search3|DOHGAJ|1511	1512	DOHGAJ	175.308
search3|DOHGEN|1512	1513	DOHGEN	159.662
search3|DOHGEN|1513	1514	DOHGEN	156.718
search3|DOHGEN|1514	1515	DOHGEN	172.06
search3|DOHGEN|1515	1516	DOHGEN	163.024
search3|DOHGEN|1516	1517	DOHGEN	153.169
search3|DOHGEN|1517	1518	DOHGEN	171.176
search3|DOHGEN|1518	1519	DOHGEN	164.144
search3|DOHGEN|1519	1520	DOHGEN	168.447
search3|DOHZIK|1520	1521	DOHZIK	157.076
search3|DOHZIK01|1521	1522	DOHZIK01	157.505
search3|DOHZIK02|1522	1523	DOHZIK02	156.997
search3|DOJXOP|1523	1524	DOJXOP	166.846
search3|DOJXOP|1524	1525	DOJXOP	171.47
search3|DOJXOP01|1525	1526	DOJXOP01	166.796
search3|DOJXOP01|1526	1527	DOJXOP01	173.605
search3|DOLLIB|1527	1528	DOLLIB	145.953
search3|DOLLIB|1528	1529	DOLLIB	153.542
search3|DOLLIB|1529	1530	DOLLIB	162.84
search3|DOLTUT|1530	1531	DOLTUT	169.031
search3|DOLTUT|1531	1532	DOLTUT	174.765
search3|DOLTUT|1532	1533	DOLTUT	164.358
search3|DOLTUT|1533	1534	DOLTUT	164.195
search3|DOLTUT|1534	1535	DOLTUT	166.563
search3|DOLTUT|1535	1536	DOLTUT	155.607
search3|DOLTUT|1536	1537	DOLTUT	163.575
search3|DOLTUT|1537	1538	DOLTUT	171.931
search3|DOLTUT|1538	1539	DOLTUT	175.662
search3|DOMHIW|1539	1540	DOMHIW	169.114
search3|DOMHIW|1540	1541	DOMHIW	168.249
search3|DOMKEW|1541	1542	DOMKEW	168.039
search3|DOPXAJ|1542	1543	DOPXAJ	176.598
search3|DOPZUE|1543	1544	DOPZUE	177.561
search3|DORCIX|1544	1545	DORCIX	175.143
search3|DORCIX|1545	1546	DORCIX	162.016
search3|DORCIX01|1546	1547	DORCIX01	169.664
search3|DORCIX01|1547	1548	DORCIX01	173.64
search3|DORCIX02|1548	1549	DORCIX02	176.034
search3|DORLIF|1549	1550	DORLIF	172.058
search3|DORLIF|1550	1551	DORLIF	171.741
search3|DORLIF|1551	1552	DORLIF	169.379
search3|DORLIF|1552	1553	DORLIF	163.666
search3|DORLIF|1553	1554	DORLIF	172.783
search3|DORLIF|1554	1555	DORLIF	167.972
search3|DORLIF|1555	1556	DORLIF	167.356
search3|DORLIF|1556	1557	DORLIF	171.021
search3|DORLIF|1557	1558	DORLIF	169.212
search3|DORLIF10|1558	1559	DORLIF10	164.488
search3|DORLIF10|1559	1560	DORLIF10	165.913
search3|DORLIF10|1560	1561	DORLIF10	173.31
search3|DORLIF10|1561	1562	DORLIF10	169.865
search3|DORLIF10|1562	1563	DORLIF10	176.476
search3|DORLIF10|1563	1564	DORLIF10	170.15
search3|DORLIF10|1564	1565	DORLIF10	172.303
search3|DORLIF10|1565	1566	DORLIF10	172.843
search3|DORLIF10|1566	1567	DORLIF10	166.756
search3|DOTKIH|1567	1568	DOTKIH	163.481
search3|DOTKON|1568	1569	DOTKON	175.184
search3|DOTKON|1569	1570	DOTKON	176.891
search3|DOTKON|1570	1571	DOTKON	147.724
search3|DOTKON|1571	1572	DOTKON	153.825
search3|DOTKUT|1572	1573	DOTKUT	174.842
search3|DOTKUT|1573	1574	DOTKUT	165.206
search3|DOTLAA|1574	1575	DOTLAA	158.415
search3|DOVMOQ|1575	1576	DOVMOQ	168.745
search3|DOVTUD|1576	1577	DOVTUD	167.231
search3|DOVTUD|1577	1578	DOVTUD	168.269
search3|DOWCUP|1578	1579	DOWCUP	169.42
search3|DOXBUN|1579	1580	DOXBUN	172.685
search3|DOXBUN10|1580	1581	DOXBUN10	172.685
search3|DOXCAU|1581	1582	DOXCAU	165.372
search3|DOXCAU10|1582	1583	DOXCAU10	165.372
search3|DOXPEM|1583	1584	DOXPEM	170.068
search3|DOXPUC|1584	1585	DOXPUC	163.27
search3|DOYGII|1585	1586	DOYGII	164.269
search3|DOYGII|1586	1587	DOYGII	180.0
search3|DOYWIZ|1587	1588	DOYWIZ	175.624
search3|DOYWIZ|1588	1589	DOYWIZ	169.999
search3|DOYWOF|1589	1590	DOYWOF	171.55
search3|DOYWOF|1590	1591	DOYWOF	165.329
search3|DOZRUG|1591	1592	DOZRUG	171.994
search3|DOZRUG|1592	1593	DOZRUG	175.432
search3|DPMTCM|1593	1594	DPMTCM	174.694
search3|DPMTCM|1594	1595	DPMTCM	170.548
search3|DPMTCM|1595	1596	DPMTCM	171.018
search3|DPMTCM|1596	1597	DPMTCM	170.397
search3|DPPPDN10|1597	1598	DPPPDN10	164.97
search3|DPPTCC|1598	1599	DPPTCC	176.715
search3|DPPTCC|1599	1600	DPPTCC	167.692
search3|DUBBOT|1600	1601	DUBBOT	158.426
search3|DUBBOT|1601	1602	DUBBOT	153.466
search3|DUBBOT|1602	1603	DUBBOT	164.005
search3|DUBBOT|1603	1604	DUBBOT	165.153
search3|DUBBUZ|1604	1605	DUBBUZ	174.556
search3|DUBBUZ|1605	1606	DUBBUZ	158.146
search3|DUBCAG|1606	1607	DUBCAG	155.227
search3|DUBCAG|1607	1608	DUBCAG	156.556
search3|DUBNIZ|1608	1609	DUBNIZ	153.23
search3|DUBNIZ|1609	1610	DUBNIZ	168.355
search3|DUCFAJ|1610	1611	DUCFAJ	175.785
search3|DUCJEQ|1611	1612	DUCJEQ	177.311
search3|DUDJUJ|1612	1613	DUDJUJ	157.53
search3|DUDJUJ|1613	1614	DUDJUJ	161.012
search3|DUDSEC|1614	1615	DUDSEC	167.984
search3|DUDSEC|1615	1616	DUDSEC	148.607
search3|DUDSIG|1616	1617	DUDSIG	167.579
search3|DUDSIG|1617	1618	DUDSIG	148.873
search3|DUFDUE|1618	1619	DUFDUE	174.818
search3|DUFFAM|1619	1620	DUFFAM	172.759
search3|DUFFAM|1620	1621	DUFFAM	167.451
search3|DUFFEQ|1621	1622	DUFFEQ	176.744
search3|DUFFEQ|1622	1623	DUFFEQ	173.89
search3|DUFFEQ|1623	1624	DUFFEQ	176.629
search3|DUFXUX|1624	1625	DUFXUX	176.2
search3|DUFXUX|1625	1626	DUFXUX	172.263
search3|DUFXUX|1626	1627	DUFXUX	171.299
search3|DUFXUX|1627	1628	DUFXUX	172.092
search3|DUFXUX|1628	1629	DUFXUX	169.987
search3|DUFXUX|1629	1630	DUFXUX	171.413
search3|DUHPIH|1630	1631	DUHPIH	173.042
search3|DUHPUT|1631	1632	DUHPUT	175.522
search3|DUHQII|1632	1633	DUHQII	174.501
search3|DUHQII|1633	1634	DUHQII	173.617
search3|DUHQII|1634	1635	DUHQII	171.64
search3|DUHQII|1635	1636	DUHQII	174.893
search3|DUHQII01|1636	1637	DUHQII01	171.39
search3|DUHQII01|1637	1638	DUHQII01	177.012
search3|DUHQII01|1638	1639	DUHQII01	172.338
search3|DUHQII01|1639	1640	DUHQII01	175.733
search3|DUKCAO|1640	1641	DUKCAO	170.665
search3|DUKHEY|1641	1642	DUKHEY	165.851
search3|DUKHEY|1642	1643	DUKHEY	164.94
search3|DUKHIC|1643	1644	DUKHIC	161.091
search3|DUKJAW|1644	1645	DUKJAW	171.004
search3|DUKJAW01|1645	1646	DUKJAW01	173.925
search3|DUKJIE|1646	1647	DUKJIE	159.478
search3|DULPIK|1647	1648	DULPIK	171.647
search3|DULPOQ|1648	1649	DULPOQ	156.681
search3|DULPOQ|1649	1650	DULPOQ	165.9
search3|DULPUW|1650	1651	DULPUW	158.386
search3|DUMBOD|1651	1652	DUMBOD	167.588
search3|DUMBOD|1652	1653	DUMBOD	160.217
search3|DUMCIY|1653	1654	DUMCIY	151.862
search3|DUMSAF|1654	1655	DUMSAF	158.596
search3|DUMSAF|1655	1656	DUMSAF	165.503
search3|DUMSAF|1656	1657	DUMSAF	160.605
search3|DUMSAF|1657	1658	DUMSAF	168.863
search3|DUMSAF|1658	1659	DUMSAF	166.562
search3|DUMSAF|1659	1660	DUMSAF	170.662
search3|DUMSAF|1660	1661	DUMSAF	165.921
search3|DUMSAF|1661	1662	DUMSAF	154.284
search3|DUMSAF|1662	1663	DUMSAF	174.262
search3|DUPFEZ01|1663	1664	DUPFEZ01	160.091
search3|DUPFEZ01|1664	1665	DUPFEZ01	170.245
search3|DUPFEZ10|1665	1666	DUPFEZ10	151.772
search3|DUPFEZ10|1666	1667	DUPFEZ10	168.722
search3|DUPFEZ10|1667	1668	DUPFEZ10	171.228
search3|DUPFOJ10|1668	1669	DUPFOJ10	169.469
search3|DUPFOJ11|1669	1670	DUPFOJ11	165.156
search3|DUPLOP|1670	1671	DUPLOP	176.701
search3|DUPYUJ|1671	1672	DUPYUJ	162.177
search3|DUPYUJ|1672	1673	DUPYUJ	173.616
search3|DURBOI|1673	1674	DURBOI	132.01
search3|DURBOI|1674	1675	DURBOI	128.213
search3|DURDUQ|1675	1676	DURDUQ	173.019
search3|DURFOM|1676	1677	DURFOM	160.539
search3|DURGED|1677	1678	DURGED	140.562
search3|DURGED|1678	1679	DURGED	170.816
search3|DURHAZ|1679	1680	DURHAZ	163.216
search3|DURHAZ01|1680	1681	DURHAZ01	161.531
search3|DURXEV|1681	1682	DURXEV	172.386
search3|DURXEV|1682	1683	DURXEV	150.635
search3|DURXEV01|1683	1684	DURXEV01	167.254
search3|DURXEV01|1684	1685	DURXEV01	172.237
search3|DUSLEI|1685	1686	DUSLEI	161.355
search3|DUSLEI|1686	1687	DUSLEI	171.479
search3|DUSLEI|1687	1688	DUSLEI	166.117
search3|DUSLEI|1688	1689	DUSLEI	152.643
search3|DUTJEJ|1689	1690	DUTJEJ	170.774
search3|DUTJEJ|1690	1691	DUTJEJ	174.953
search3|DUTJIN|1691	1692	DUTJIN	167.326
search3|DUTJIN|1692	1693	DUTJIN	173.501
search3|DUTJIN|1693	1694	DUTJIN	177.043
search3|DUTJIN|1694	1695	DUTJIN	177.528
search3|DUTLEL|1695	1696	DUTLEL	169.313
search3|DUTXAR10|1696	1697	DUTXAR10	166.387
search3|DUTXAR11|1697	1698	DUTXAR11	166.791
search3|DUTXAR12|1698	1699	DUTXAR12	166.946
search3|DUTXAR12|1699	1700	DUTXAR12	164.023
search3|DUTXAR13|1700	1701	DUTXAR13	167.327
search3|DUTXAR13|1701	1702	DUTXAR13	161.174
search3|DUTXAR14|1702	1703	DUTXAR14	167.693
search3|DUTXEV10|1703	1704	DUTXEV10	162.53
search3|DUTXIZ10|1704	1705	DUTXIZ10	167.158
search3|DUTXIZ10|1705	1706	DUTXIZ10	171.448
search3|DUWHIO|1706	1707	DUWHIO	172.606
search3|DUWHIO|1707	1708	DUWHIO	174.562
search3|DUWTIZ|1708	1709	DUWTIZ	167.09
search3|DUYCOR|1709	1710	DUYCOR	166.927
search3|DUYCOR|1710	1711	DUYCOR	175.438
search3|DUYCOR|1711	1712	DUYCOR	177.967
search3|DUYCOR|1712	1713	DUYCOR	175.037
search3|DUYCOR|1713	1714	DUYCOR	149.481
search3|DUYCOR|1714	1715	DUYCOR	169.478
search3|DUYCOR01|1715	1716	DUYCOR01	166.625
search3|DUYCOR01|1716	1717	DUYCOR01	175.425
search3|DUYCOR01|1717	1718	DUYCOR01	177.129
search3|DUYCOR01|1718	1719	DUYCOR01	170.575
search3|DUYCOR01|1719	1720	DUYCOR01	150.968
search3|DUYCOR01|1720	1721	DUYCOR01	175.113
search3|DUYCOR02|1721	1722	DUYCOR02	176.217
search3|DUYCOR02|1722	1723	DUYCOR02	169.736
search3|DUYGAH|1723	1724	DUYGAH	170.342
search3|DUYGAH|1724	1725	DUYGAH	161.744
search3|DUYPAQ|1725	1726	DUYPAQ	152.572
search3|DUYSUM|1726	1727	DUYSUM	173.124
search3|DUYSUM|1727	1728	DUYSUM	164.47
search3|DUYTIB|1728	1729	DUYTIB	151.0
search3|DUYTOH|1729	1730	DUYTOH	168.886
search3|DUZVEB|1730	1731	DUZVEB	174.123
search3|EAEOCT|1731	1732	EAEOCT	166.984
search3|EAEOCT01|1732	1733	EAEOCT01	169.998
search3|EAPCCO|1733	1734	EAPCCO	166.879
search3|EAPCCO|1734	1735	EAPCCO	156.951
search3|EBAKIC|1735	1736	EBAKIC	165.655
search3|EBAKIC|1736	1737	EBAKIC	172.931
search3|EBAKIC|1737	1738	EBAKIC	166.054
search3|EBAKIC|1738	1739	EBAKIC	166.458
search3|EBAKIC|1739	1740	EBAKIC	170.396
search3|EBAKIC|1740	1741	EBAKIC	150.172
search3|EBAKIC|1741	1742	EBAKIC	169.839
search3|EBAKIC|1742	1743	EBAKIC	117.665
search3|EBALUQ|1743	1744	EBALUQ	168.685
search3|EBALUQ|1744	1745	EBALUQ	173.785
search3|EBAMAX|1745	1746	EBAMAX	174.286
search3|EBAMAX|1746	1747	EBAMAX	173.337
search3|EBAVAG|1747	1748	EBAVAG	175.673
search3|EBEBUJ|1748	1749	EBEBUJ	176.004
search3|EBEBUJ|1749	1750	EBEBUJ	171.916
search3|EBEBUK|1750	1751	EBEBUK	141.955
search3|EBEBUK|1751	1752	EBEBUK	171.48
search3|EBECAQ|1752	1753	EBECAQ	167.346
search3|EBECAQ|1753	1754	EBECAQ	175.467
search3|EBECEU|1754	1755	EBECEU	176.475
search3|EBECEU|1755	1756	EBECEU	170.9
search3|EBECIZ|1756	1757	EBECIZ	175.246
search3|EBECIZ|1757	1758	EBECIZ	171.666
search3|EBECIZ|1758	1759	EBECIZ	166.709
search3|EBECIZ|1759	1760	EBECIZ	171.942
search3|EBEDAS|1760	1761	EBEDAS	166.902
search3|EBEDAS|1761	1762	EBEDAS	163.815
search3|EBEFAU|1762	1763	EBEFAU	145.062
search3|EBEFAU01|1763	1764	EBEFAU01	143.939
search3|EBEFAU02|1764	1765	EBEFAU02	144.305
search3|EBEFIC|1765	1766	EBEFIC	169.634
search3|EBEFIC01|1766	1767	EBEFIC01	169.915
search3|EBEJEC|1767	1768	EBEJEC	174.146
search3|EBETEM|1768	1769	EBETEM	169.039
search3|EBEYER|1769	1770	EBEYER	171.961
search3|EBEYOB|1770	1771	EBEYOB	170.785
search3|EBIBIC|1771	1772	EBIBIC	175.222
search3|EBIBIC|1772	1773	EBIBIC	175.151
search3|EBIBIC|1773	1774	EBIBIC	174.778
search3|EBIBOI|1774	1775	EBIBOI	176.081
search3|EBIBOI|1775	1776	EBIBOI	168.538
search3|EBIBOI|1776	1777	EBIBOI	174.75
search3|EBIBOI|1777	1778	EBIBOI	170.696
search3|EBIBUO|1778	1779	EBIBUO	172.337
search3|EBIBUO|1779	1780	EBIBUO	176.652
search3|EBIBUO|1780	1781	EBIBUO	168.764
search3|EBOFAD|1781	1782	EBOFAD	177.077
search3|EBOFEH|1782	1783	EBOFEH	156.493
search3|EBOFEH|1783	1784	EBOFEH	164.104
search3|EBOFEH|1784	1785	EBOFEH	165.151
search3|EBOFOR|1785	1786	EBOFOR	162.139
search3|EBOFOR01|1786	1787	EBOFOR01	176.729
search3|EBOFUX|1787	1788	EBOFUX	165.861
search3|EBOTOG|1788	1789	EBOTOG	177.972
search3|EBOTOG|1789	1790	EBOTOG	174.219
search3|EBOTOG|1790	1791	EBOTOG	165.574
search3|EBOTOG|1791	1792	EBOTOG	173.66
search3|EBOTOG01|1792	1793	EBOTOG01	176.574
search3|EBOTOG01|1793	1794	EBOTOG01	173.614
search3|EBOTOG01|1794	1795	EBOTOG01	166.792
search3|EBOTOG01|1795	1796	EBOTOG01	173.402
search3|EBOVAU|1796	1797	EBOVAU	174.396
search3|EBOVAU|1797	1798	EBOVAU	171.241
search3|EBUKAP|1798	1799	EBUKAP	179.723
search3|EBUKAP01|1799	1800	EBUKAP01	154.413
search3|EBUMAP|1800	1801	EBUMAP	162.467
search3|ECABOB|1801	1802	ECABOB	163.572
search3|ECACAO|1802	1803	ECACAO	164.783
search3|ECACAO|1803	1804	ECACAO	165.256
search3|ECOSAR|1804	1805	ECOSAR	165.05
search3|ECOSAR|1805	1806	ECOSAR	167.253
search3|ECOWUO|1806	1807	ECOWUO	160.711
search3|ECOWUO|1807	1808	ECOWUO	165.755
search3|ECULEU|1808	1809	ECULEU	154.733
search3|ECUPOI|1809	1810	ECUPOI	173.266
search3|ECUPOI|1810	1811	ECUPOI	166.715
search3|EDADOE|1811	1812	EDADOE	162.317
search3|EDAGUN|1812	1813	EDAGUN	168.834
search3|EDAPUU|1813	1814	EDAPUU	172.109
search3|EDAPUU|1814	1815	EDAPUU	172.067
search3|EDAQIK|1815	1816	EDAQIK	173.864
search3|EDAQIK01|1816	1817	EDAQIK01	173.542
search3|EDAQIK02|1817	1818	EDAQIK02	173.141
search3|EDAQOQ|1818	1819	EDAQOQ	169.321
search3|EDAQUV|1819	1820	EDAQUV	163.351
search3|EDAQUV|1820	1821	EDAQUV	163.648
search3|EDIDEC|1821	1822	EDIDEC	165.975
search3|EDITCN|1822	1823	EDITCN	140.351
search3|EDITCN01|1823	1824	EDITCN01	143.338
search3|EDITCN02|1824	1825	EDITCN02	175.223
search3|EDITCN02|1825	1826	EDITCN02	173.458
search3|EDOWEB|1826	1827	EDOWEB	173.274
search3|EDTCOX|1827	1828	EDTCOX	112.518
search3|EDULEW|1828	1829	EDULEW	168.722
search3|EDULEW|1829	1830	EDULEW	163.49
search3|EDULEW|1830	1831	EDULEW	150.198
search3|EDULEW|1831	1832	EDULEW	147.238
search3|EDUNEX|1832	1833	EDUNEX	168.51
search3|EFAFUN|1833	1834	EFAFUN	170.478
search3|EFAFUN|1834	1835	EFAFUN	151.555
search3|EFAFUN|1835	1836	EFAFUN	139.741
search3|EFAFUN|1836	1837	EFAFUN	154.163
search3|EFECIC|1837	1838	EFECIC	165.68
search3|EFOXAA|1838	1839	EFOXAA	167.892
search3|EFOXII|1839	1840	EFOXII	166.342
search3|EFOXOO|1840	1841	EFOXOO	178.357
search3|EFOXOO|1841	1842	EFOXOO	179.695
search3|EFOXUU|1842	1843	EFOXUU	162.189
search3|EFUGIW|1843	1844	EFUGIW	162.89
search3|EFUGIW|1844	1845	EFUGIW	160.506
search3|EFUGIW|1845	1846	EFUGIW	164.607
search3|EFUGIW|1846	1847	EFUGIW	164.907
search3|EFUHOC|1847	1848	EFUHOC	167.91
search3|EFUHOC|1848	1849	EFUHOC	174.545
search3|EFUHOC|1849	1850	EFUHOC	169.499
search3|EFUHOC|1850	1851	EFUHOC	168.143
search3|EFUHUI|1851	1852	EFUHUI	175.461
search3|EFUHUI|1852	1853	EFUHUI	177.905
search3|EFUHUI|1853	1854	EFUHUI	173.098
search3|EFUHUI|1854	1855	EFUHUI	176.184
search3|EFUKIA|1855	1856	EFUKIA	179.152
search3|EGEWIW|1856	1857	EGEWIW	161.9
search3|EGEWIW|1857	1858	EGEWIW	160.19
search3|EGEWIW01|1858	1859	EGEWIW01	161.187
search3|EGODUA|1859	1860	EGODUA	175.676
search3|EHABOE|1860	1861	EHABOE	155.101
search3|EHABUK|1861	1862	EHABUK	170.033
search3|EHACAR|1862	1863	EHACAR	168.058
search3|EHAKUU|1863	1864	EHAKUU	175.859
search3|EHEZUN|1864	1865	EHEZUN	144.402
search3|EHEZUN|1865	1866	EHEZUN	143.08
search3|EHIXUP|1866	1867	EHIXUP	171.722
search3|EHOGUE|1867	1868	EHOGUE	170.71
search3|EHOLUJ|1868	1869	EHOLUJ	170.811
search3|EHOLUJ|1869	1870	EHOLUJ	157.924
search3|EINICI|1870	1871	EINICI	175.917
search3|EINIPC|1871	1872	EINIPC	173.843
search3|EJADAU|1872	1873	EJADAU	145.703
search3|EJAVUG|1873	1874	EJAVUG	173.568
search3|EJAVUG|1874	1875	EJAVUG	162.864
search3|EJIHEM|1875	1876	EJIHEM	165.879
search3|EJIHEM|1876	1877	EJIHEM	164.573
search3|EJIHIQ|1877	1878	EJIHIQ	159.903
search3|EJUPUW|1878	1879	EJUPUW	161.952
search3|EJUPUW|1879	1880	EJUPUW	159.101
search3|EJUREG|1880	1881	EJUREG	173.072
search3|EJURIK|1881	1882	EJURIK	165.195
search3|EJUROQ|1882	1883	EJUROQ	154.891
search3|EJUWEM|1883	1884	EJUWEM	158.136
search3|EJUWEM|1884	1885	EJUWEM	171.113
search3|EKACUP|1885	1886	EKACUP	146.642
search3|EKACUP|1886	1887	EKACUP	163.477
search3|EKANOV|1887	1888	EKANOV	157.862
search3|EKANOV|1888	1889	EKANOV	148.562
search3|EKAPAJ|1889	1890	EKAPAJ	163.478
search3|EKAPAJ|1890	1891	EKAPAJ	167.042
search3|EKAPAJ|1891	1892	EKAPAJ	171.589
search3|EKAPAJ|1892	1893	EKAPAJ	174.65
search3|EKAPAJ01|1893	1894	EKAPAJ01	164.265
search3|EKAPAJ01|1894	1895	EKAPAJ01	167.731
search3|EKAREN|1895	1896	EKAREN	177.646
search3|EKAREN|1896	1897	EKAREN	177.232
search3|EKAREN|1897	1898	EKAREN	175.702
search3|EKAREN|1898	1899	EKAREN	179.007
search3|EKAREN|1899	1900	EKAREN	170.73
search3|EKEDII|1900	1901	EKEDII	172.517
search3|EKEQUG|1901	1902	EKEQUG	154.753
search3|EKICUX|1902	1903	EKICUX	144.432
search3|EKIGEL|1903	1904	EKIGEL	170.257
search3|EKOBUB|1904	1905	EKOBUB	176.975
search3|EKOBUB|1905	1906	EKOBUB	166.765
search3|EKOBUB|1906	1907	EKOBUB	170.972
search3|EKOCAI|1907	1908	EKOCAI	172.247
search3|EKOCAI|1908	1909	EKOCAI	173.461
search3|EKOCAI|1909	1910	EKOCAI	172.464
search3|ELESEU|1910	1911	ELESEU	156.457
search3|ELESIY|1911	1912	ELESIY	173.821
search3|ELESOE|1912	1913	ELESOE	145.198
search3|ELEXEZ|1913	1914	ELEXEZ	163.154
search3|ELONAV|1914	1915	ELONAV	130.354
search3|ELONAV|1915	1916	ELONAV	157.024
search3|ELONAV|1916	1917	ELONAV	177.391
search3|ELONAV|1917	1918	ELONAV	144.183
search3|ELONAV|1918	1919	ELONAV	143.387
search3|ELONAV|1919	1920	ELONAV	175.697
search3|ELONAV|1920	1921	ELONAV	156.981
search3|ELONAV|1921	1922	ELONAV	153.168
search3|ELOXUY|1922	1923	ELOXUY	160.977
search3|ELOXUY01|1923	1924	ELOXUY01	161.204
search3|ELOXUY02|1924	1925	ELOXUY02	160.891
search3|ELUHAU|1925	1926	ELUHAU	168.669
search3|ELUYIT|1926	1927	ELUYIT	172.763
search3|EMASIU|1927	1928	EMASIU	160.052
search3|EMASIU|1928	1929	EMASIU	157.713
search3|EMEHOU|1929	1930	EMEHOU	163.406
search3|EMEHUA|1930	1931	EMEHUA	152.912
search3|EMEJIR|1931	1932	EMEJIR	152.007
search3|EMEJIR|1932	1933	EMEJIR	161.247
search3|EMEJIR|1933	1934	EMEJIR	148.396
search3|EMEJIR|1934	1935	EMEJIR	145.501
search3|EMEJOX|1935	1936	EMEJOX	150.451
search3|EMEJOX|1936	1937	EMEJOX	158.696
search3|EMEJOX|1937	1938	EMEJOX	169.352
search3|EMEJOX|1938	1939	EMEJOX	152.331
search3|EMEJUD|1939	1940	EMEJUD	153.332
search3|EMEJUD|1940	1941	EMEJUD	156.79
search3|EMEJUD|1941	1942	EMEJUD	158.547
search3|EMEJUD|1942	1943	EMEJUD	166.646
search3|EMEPER|1943	1944	EMEPER	169.731
search3|EMEPER01|1944	1945	EMEPER01	169.72
search3|EMUSEM|1945	1946	EMUSEM	166.295
search3|EMUSEM|1946	1947	EMUSEM	166.328
search3|ENAWAS|1947	1948	ENAWAS	125.031
search3|ENAWAS|1948	1949	ENAWAS	129.131
search3|ENAWAS|1949	1950	ENAWAS	170.699
search3|ENCDCL|1950	1951	ENCDCL	150.552
search3|ENCTMN|1951	1952	ENCTMN	163.559
search3|ENICCD|1952	1953	ENICCD	153.422
search3|ENICCD|1953	1954	ENICCD	164.301
search3|ENICON|1954	1955	ENICON	174.05
search3|ENICON|1955	1956	ENICON	169.764
search3|ENICON|1956	1957	ENICON	163.029
search3|ENICON|1957	1958	ENICON	171.188
search3|ENINCO|1958	1959	ENINCO	175.322
search3|ENNCCO10|1959	1960	ENNCCO10	176.006
search3|ENNICL10|1960	1961	ENNICL10	165.754
search3|ENNTRC|1961	1962	ENNTRC	170.086
search3|ENOQAA|1962	1963	ENOQAA	158.833
search3|ENOQAA|1963	1964	ENOQAA	159.796
search3|ENOQAA|1964	1965	ENOQAA	170.543
search3|EPAYEB|1965	1966	EPAYEB	151.445
search3|EPAYIF|1966	1967	EPAYIF	152.75
search3|EPAYOL|1967	1968	EPAYOL	162.084
search3|EPAYUR|1968	1969	EPAYUR	176.873
search3|EPAYUR|1969	1970	EPAYUR	165.496
search3|EPISEC|1970	1971	EPISEC	176.645
search3|EPISEC|1971	1972	EPISEC	176.898
search3|EPUHON|1972	1973	EPUHON	154.086
search3|EQEGEN|1973	1974	EQEGEN	157.834
search3|EQEGOX|1974	1975	EQEGOX	176.153
search3|EQEGOX|1975	1976	EQEGOX	155.828
search3|EQEHAK|1976	1977	EQEHAK	173.636
search3|EQEHAK|1977	1978	EQEHAK	173.667
search3|EQIDEO|1978	1979	EQIDEO	154.363
search3|EQIDEO|1979	1980	EQIDEO	161.845
search3|EQIMIB|1980	1981	EQIMIB	142.914
search3|EQIMIB|1981	1982	EQIMIB	138.207
search3|EQIQIF|1982	1983	EQIQIF	158.075
search3|EQIQIF|1983	1984	EQIQIF	165.782
search3|EQIZEJ|1984	1985	EQIZEJ	169.481
search3|EQIZEJ|1985	1986	EQIZEJ	170.308
search3|EQIZEJ|1986	1987	EQIZEJ	172.329
search3|EQOQUX|1987	1988	EQOQUX	155.863
search3|EQOWOX|1988	1989	EQOWOX	162.133
search3|EQOWOX|1989	1990	EQOWOX	163.383
search3|EQOWOX|1990	1991	EQOWOX	164.448
search3|EQOWOX|1991	1992	EQOWOX	173.996
search3|EQOWOX|1992	1993	EQOWOX	166.664
search3|EQOWOX|1993	1994	EQOWOX	172.857
search3|EQOWOX|1994	1995	EQOWOX	172.658
search3|EQOWOX|1995	1996	EQOWOX	167.718
search3|EQOWOX|1996	1997	EQOWOX	163.593
search3|EQOXEN|1997	1998	EQOXEN	155.002
search3|EQOXEN|1998	1999	EQOXEN	160.136
[truncated: 8,297 more rows]
