# Supplementary material for: Strongly coloured thiocyanate frameworks with perovskite-analogue structures
Source: Chem Sci. 2018 Oct 26;10(3):793–801. doi: 10.1039/c8sc04082f (PMC6345348; doi:10.1039/c8sc04082f)
Supplement: SC-010-C8SC04082F-s003 [file SC-010-C8SC04082F-s003.csv]

Entry	Index	NAME	ANG1
search1|ARASAP|0	1	ARASAP	101.436
search1|ATEHUE|1	2	ATEHUE	106.488
search1|AWOMEG|2	3	AWOMEG	119.233
search1|ETEVOQ|3	4	ETEVOQ	102.458
search1|ISOKUY|4	5	ISOKUY	101.374
search1|ABIQAE|5	6	ABIQAE	100.544
search1|ABIQAE|6	7	ABIQAE	96.971
search1|ABIRUY|7	8	ABIRUY	100.4
search1|ABOBIC|8	9	ABOBIC	100.482
search1|ABOBIC|9	10	ABOBIC	101.442
search1|ACIRIP|10	11	ACIRIP	98.939
search1|ACIRIP|11	12	ACIRIP	95.92
search1|ACOXRH|12	13	ACOXRH	105.201
search1|ACOXRH|13	14	ACOXRH	100.935
search1|ADMGCO10|14	15	ADMGCO10	105.102
search1|AFEYAL02|15	16	AFEYAL02	101.044
search1|AFEYAL02|16	17	AFEYAL02	103.538
search1|AFEYAL02|17	18	AFEYAL02	101.918
search1|AFEYAL02|18	19	AFEYAL02	101.353
search1|AFEYAL04|19	20	AFEYAL04	100.142
search1|AFEYAL04|20	21	AFEYAL04	104.85
search1|AFEYAL04|21	22	AFEYAL04	87.226
search1|AFUHAL|22	23	AFUHAL	100.161
search1|AGESAH|23	24	AGESAH	96.743
search1|AGESAH|24	25	AGESAH	102.737
search1|AGODIK|25	26	AGODIK	107.99
search1|AHAYAK|26	27	AHAYAK	97.76
search1|AHAYAK|27	28	AHAYAK	98.411
search1|AHIBUQ|28	29	AHIBUQ	109.571
search1|AHIJAC|29	30	AHIJAC	115.947
search1|AJIPOZ|30	31	AJIPOZ	99.584
search1|AJIPOZ|31	32	AJIPOZ	103.726
search1|AJIPOZ|32	33	AJIPOZ	101.833
search1|AJIPUF|33	34	AJIPUF	98.69
search1|AJIPUF|34	35	AJIPUF	100.839
search1|AKANEF|35	36	AKANEF	97.52
search1|AKANEF|36	37	AKANEF	101.739
search1|AKANEF|37	38	AKANEF	94.409
search1|AKUCAK|38	39	AKUCAK	102.932
search1|AKUCAK|39	40	AKUCAK	107.341
search1|ANABIB|40	41	ANABIB	97.282
search1|ANABOH|41	42	ANABOH	96.889
search1|ANABUN|42	43	ANABUN	96.028
search1|ANIDEI|43	44	ANIDEI	96.86
search1|ANIDEI01|44	45	ANIDEI01	96.439
search1|ANIDEI01|45	46	ANIDEI01	97.519
search1|ANIDEI02|46	47	ANIDEI02	97.968
search1|AQICAE|47	48	AQICAE	103.726
search1|AQICAE|48	49	AQICAE	99.21
search1|AQICAE|49	50	AQICAE	98.071
search1|AQICAE|50	51	AQICAE	105.646
search1|AREHIO|51	52	AREHIO	102.84
search1|AREHIO|52	53	AREHIO	101.729
search1|AREHOU|53	54	AREHOU	108.407
search1|AREKIR|54	55	AREKIR	101.385
search1|AREKIR|55	56	AREKIR	104.376
search1|AREKIR|56	57	AREKIR	101.746
search1|AREKIR|57	58	AREKIR	98.899
search1|AREKOX|58	59	AREKOX	103.047
search1|AREKOX|59	60	AREKOX	100.495
search1|AREKOX|60	61	AREKOX	102.067
search1|AREKOX|61	62	AREKOX	102.212
search1|AREKUD|62	63	AREKUD	101.189
search1|ARIFEM|63	64	ARIFEM	99.768
search1|ARIFEM|64	65	ARIFEM	101.158
search1|AVATAS|65	66	AVATAS	99.12
search1|AYURIV|66	67	AYURIV	105.237
search1|AYURIV|67	68	AYURIV	101.679
search1|AYURIV|68	69	AYURIV	104.265
search1|AYUSAO|69	70	AYUSAO	100.474
search1|AYUSAO|70	71	AYUSAO	103.191
search1|AYUSAO|71	72	AYUSAO	102.987
search1|AZFRCU|72	73	AZFRCU	106.743
search1|AZFRCU|73	74	AZFRCU	109.229
search1|BACVOQ01|74	75	BACVOQ01	99.659
search1|BACVOQ10|75	76	BACVOQ10	105.209
search1|BAHSOS|76	77	BAHSOS	107.109
search1|BAHSOS|77	78	BAHSOS	104.486
search1|BEGWIU|78	79	BEGWIU	109.619
search1|BEGWOA|79	80	BEGWOA	106.233
search1|BEGWOA|80	81	BEGWOA	103.969
search1|BEHMEI|81	82	BEHMEI	99.754
search1|BEHMEI01|82	83	BEHMEI01	99.241
search1|BEHRUB|83	84	BEHRUB	103.71
search1|BEHYUI|84	85	BEHYUI	107.518
search1|BEJHON|85	86	BEJHON	105.36
search1|BEPCOO|86	87	BEPCOO	102.792
search1|BIDNAF|87	88	BIDNAF	109.323
search1|BIDNAF|88	89	BIDNAF	113.8
search1|BILPES|89	90	BILPES	102.773
search1|BIXVAF10|90	91	BIXVAF10	100.726
search1|BOQSUW|91	92	BOQSUW	103.098
search1|BOQSUW01|92	93	BOQSUW01	103.067
search1|BOQTAD|93	94	BOQTAD	96.42
search1|BOQTAD|94	95	BOQTAD	98.573
search1|BOQTEH|95	96	BOQTEH	110.389
search1|BOQTEH|96	97	BOQTEH	100.167
search1|BOVLUU|97	98	BOVLUU	101.815
search1|BOVLUU|98	99	BOVLUU	97.341
search1|BOYQAH|99	100	BOYQAH	100.584
search1|BOYQAH01|100	101	BOYQAH01	100.558
search1|BUGJEU|101	102	BUGJEU	97.019
search1|BUGJEU|102	103	BUGJEU	96.898
search1|BUGJEU|103	104	BUGJEU	94.709
search1|BUGJEU|104	105	BUGJEU	96.57
search1|BUGJEU|105	106	BUGJEU	98.682
search1|BUGJEU|106	107	BUGJEU	94.214
search1|BUGJEU|107	108	BUGJEU	96.36
search1|BUGJEU|108	109	BUGJEU	97.777
search1|BULVAF|109	110	BULVAF	100.883
search1|BULVAF|110	111	BULVAF	106.281
search1|BULVAF|111	112	BULVAF	111.313
search1|BUMVEK|112	113	BUMVEK	98.58
search1|BUMVEK|113	114	BUMVEK	96.329
search1|BUTFAZ|114	115	BUTFAZ	97.045
search1|BUTFAZ|115	116	BUTFAZ	100.343
search1|BUTFAZ|116	117	BUTFAZ	95.013
search1|BUTFAZ|117	118	BUTFAZ	96.144
search1|BUTYOG|118	119	BUTYOG	100.237
search1|BUTYOG|119	120	BUTYOG	96.566
search1|BUWXAS|120	121	BUWXAS	101.211
search1|BUWXAS|121	122	BUWXAS	99.244
search1|BUYCII|122	123	BUYCII	95.079
search1|BUYCII|123	124	BUYCII	93.256
search1|BUYCOO|124	125	BUYCOO	101.648
search1|BUYCOO|125	126	BUYCOO	100.012
search1|BUYCOO|126	127	BUYCOO	99.132
search1|BUYCUU|127	128	BUYCUU	102.924
search1|BUYCUU|128	129	BUYCUU	97.295
search1|BUYCUU|129	130	BUYCUU	90.554
search1|BUYDAB|130	131	BUYDAB	96.201
search1|BUYDAB|131	132	BUYDAB	99.721
search1|BUYDAB|132	133	BUYDAB	98.736
search1|BUYDAB|133	134	BUYDAB	96.92
search1|BUYDAB|134	135	BUYDAB	98.223
search1|BUYDEF|135	136	BUYDEF	93.01
search1|BUYDEF|136	137	BUYDEF	95.496
search1|BUYDEF|137	138	BUYDEF	93.952
search1|BUYDEF|138	139	BUYDEF	95.347
search1|CABDEP|139	140	CABDEP	111.74
search1|CAPWAR|140	141	CAPWAR	103.079
search1|CAPWIZ|141	142	CAPWIZ	108.656
search1|CAXQUN|142	143	CAXQUN	101.322
search1|CAXQUN|143	144	CAXQUN	105.248
search1|CAYDAH|144	145	CAYDAH	96.117
search1|CBMPDD10|145	146	CBMPDD10	109.653
search1|CBYNPT|146	147	CBYNPT	103.136
search1|CECYIT|147	148	CECYIT	100.694
search1|CECYIT|148	149	CECYIT	96.629
search1|CECZAM|149	150	CECZAM	99.522
search1|CECZAM|150	151	CECZAM	99.703
search1|CEFCEX|151	152	CEFCEX	101.938
search1|CEFCEX|152	153	CEFCEX	98.63
search1|CEFCEX|153	154	CEFCEX	100.052
search1|CEFCEX|154	155	CEFCEX	101.123
search1|CEKGEG|155	156	CEKGEG	108.187
search1|CEKGIK|156	157	CEKGIK	105.356
search1|CERPUK|157	158	CERPUK	97.922
search1|CESTOK|158	159	CESTOK	103.417
search1|CEWCUE|159	160	CEWCUE	97.363
search1|CEWCUE|160	161	CEWCUE	101.464
search1|CEXNAU|161	162	CEXNAU	107.308
search1|CEXNAU|162	163	CEXNAU	110.171
search1|CIBZIX|163	164	CIBZIX	96.94
search1|CICFAW|164	165	CICFAW	101.393
search1|CIGYAU|165	166	CIGYAU	101.453
search1|CIHDOM|166	167	CIHDOM	99.095
search1|CIHDOM|167	168	CIHDOM	102.864
search1|CIKJUB|168	169	CIKJUB	111.988
search1|CISHES|169	170	CISHES	99.634
search1|CITGOD|170	171	CITGOD	97.837
search1|CITGOD|171	172	CITGOD	98.685
search1|CITHOD|172	173	CITHOD	96.599
search1|CITHOD|173	174	CITHOD	96.72
search1|CITHOD|174	175	CITHOD	97.807
search1|CITHOD|175	176	CITHOD	97.554
search1|CITHUJ|176	177	CITHUJ	105.991
search1|CITHUJ|177	178	CITHUJ	102.243
search1|CITHUJ|178	179	CITHUJ	96.458
search1|CMPSCU01|179	180	CMPSCU01	97.275
search1|CMPSCU01|180	181	CMPSCU01	102.17
search1|COFZIG|181	182	COFZIG	99.579
search1|COFZIG|182	183	COFZIG	95.143
search1|COGKIT|183	184	COGKIT	93.411
search1|COGKIT|184	185	COGKIT	103.115
search1|COGKIT|185	186	COGKIT	93.426
search1|COGKOZ|186	187	COGKOZ	100.095
search1|COGKOZ|187	188	COGKOZ	99.712
search1|COGKUF|188	189	COGKUF	85.976
search1|COGKUF|189	190	COGKUF	104.722
search1|COGKUF|190	191	COGKUF	91.335
search1|COGKUF|191	192	COGKUF	108.455
search1|COGLAM|192	193	COGLAM	97.307
search1|COGLEQ|193	194	COGLEQ	108.761
search1|COGLEQ|194	195	COGLEQ	107.052
search1|COGLIU|195	196	COGLIU	106.216
search1|COGLIU|196	197	COGLIU	95.262
search1|COLNUN|197	198	COLNUN	96.42
search1|COLYAE|198	199	COLYAE	100.353
search1|COQFAQ|199	200	COQFAQ	96.773
search1|COQFAQ|200	201	COQFAQ	95.757
search1|COQFAQ|201	202	COQFAQ	95.151
search1|COQFAQ|202	203	COQFAQ	99.468
search1|COSCPY|203	204	COSCPY	103.158
search1|COYCID|204	205	COYCID	97.942
search1|CUGZUZ|205	206	CUGZUZ	102.743
search1|CUHBAI|206	207	CUHBAI	103.516
search1|CUHBUC|207	208	CUHBUC	105.385
search1|CURZUL|208	209	CURZUL	97.04
search1|CURZUL|209	210	CURZUL	97.645
search1|CUSWAP|210	211	CUSWAP	97.99
search1|CUSWAP|211	212	CUSWAP	98.024
search1|CUSWAP|212	213	CUSWAP	98.709
search1|CUYFIL|213	214	CUYFIL	103.567
search1|CUYFIL|214	215	CUYFIL	99.322
search1|CUYSAR|215	216	CUYSAR	97.052
search1|CUYSEV|216	217	CUYSEV	102.864
search1|CUYSEV|217	218	CUYSEV	96.361
search1|CUYSEV|218	219	CUYSEV	97.193
search1|CUYSEV|219	220	CUYSEV	104.616
search1|CUYSIZ|220	221	CUYSIZ	107.231
search1|CUYSIZ|221	222	CUYSIZ	97.427
search1|CUYSIZ|222	223	CUYSIZ	104.036
search1|CUYSOF|223	224	CUYSOF	102.703
search1|CUYSOF|224	225	CUYSOF	102.829
search1|CUYSUL|225	226	CUYSUL	95.921
search1|CUYSUL|226	227	CUYSUL	103.261
search1|CUYTAS|227	228	CUYTAS	98.022
search1|CUYTAS|228	229	CUYTAS	94.145
search1|CUYTEW|229	230	CUYTEW	97.277
search1|DACVOT|230	231	DACVOT	93.721
search1|DACVOT01|231	232	DACVOT01	95.596
search1|DACVOT02|232	233	DACVOT02	96.862
search1|DACVOT03|233	234	DACVOT03	96.811
search1|DACVUZ|234	235	DACVUZ	101.031
search1|DACWAG|235	236	DACWAG	97.155
search1|DADPEE|236	237	DADPEE	107.527
search1|DAFLIF|237	238	DAFLIF	102.854
search1|DAFLIF02|238	239	DAFLIF02	101.365
search1|DAFLIF02|239	240	DAFLIF02	98.061
search1|DAPHEJ|240	241	DAPHEJ	104.999
search1|DAQFAC|241	242	DAQFAC	99.673
search1|DAQFAC|242	243	DAQFAC	102.362
search1|DAYDAJ|243	244	DAYDAJ	96.155
search1|DAZWUX|244	245	DAZWUX	100.527
search1|DAZWUX|245	246	DAZWUX	101.734
search1|DAZWUX|246	247	DAZWUX	100.946
search1|DAZWUX|247	248	DAZWUX	102.055
search1|DAZWUX|248	249	DAZWUX	104.767
search1|DAZWUX|249	250	DAZWUX	100.123
search1|DAZWUX|250	251	DAZWUX	100.575
search1|DAZWUX|251	252	DAZWUX	99.12
search1|DAZWUX|252	253	DAZWUX	99.397
search1|DAZWUX|253	254	DAZWUX	102.364
search1|DEJGOP|254	255	DEJGOP	101.772
search1|DEJGUV|255	256	DEJGUV	100.805
search1|DERQIA|256	257	DERQIA	98.435
search1|DERQIA|257	258	DERQIA	100.433
search1|DERQIA01|258	259	DERQIA01	96.84
search1|DERQIA01|259	260	DERQIA01	98.309
search1|DESSOK|260	261	DESSOK	100.848
search1|DEWDEO|261	262	DEWDEO	98.838
search1|DEWDEO|262	263	DEWDEO	96.493
search1|DEWDEO|263	264	DEWDEO	94.692
search1|DEWDIS|264	265	DEWDIS	98.67
search1|DEWDOY|265	266	DEWDOY	95.718
search1|DEYQUT|266	267	DEYQUT	104.487
search1|DEYRII|267	268	DEYRII	103.456
search1|DEZJAV|268	269	DEZJAV	100.836
search1|DEZJEZ|269	270	DEZJEZ	99.441
search1|DEZMOL|270	271	DEZMOL	99.471
search1|DEZMOL|271	272	DEZMOL	100.657
search1|DIDKAC|272	273	DIDKAC	94.389
search1|DIDKAC01|273	274	DIDKAC01	94.384
search1|DIFNUB|274	275	DIFNUB	102.424
search1|DIFNUB|275	276	DIFNUB	98.469
search1|DIHDUV|276	277	DIHDUV	106.153
search1|DIHDUV|277	278	DIHDUV	103.37
search1|DIHDUV|278	279	DIHDUV	101.241
search1|DIHFAD|279	280	DIHFAD	103.464
search1|DIHFAD|280	281	DIHFAD	101.957
search1|DIHFAD|281	282	DIHFAD	105.252
search1|DIJSIY|282	283	DIJSIY	101.657
search1|DIJSIY|283	284	DIJSIY	99.977
search1|DILFOU|284	285	DILFOU	105.163
search1|DIRLOF|285	286	DIRLOF	102.828
search1|DIXFEW|286	287	DIXFEW	94.118
search1|DIXFEW|287	288	DIXFEW	94.893
search1|DOMYUA|288	289	DOMYUA	97.118
search1|DOMYUA|289	290	DOMYUA	99.427
search1|DOMYUA|290	291	DOMYUA	95.108
search1|DOMYUA|291	292	DOMYUA	100.505
search1|DOQBAN|292	293	DOQBAN	94.108
search1|DOQBAN|293	294	DOQBAN	98.073
search1|DOXBOI|294	295	DOXBOI	96.251
search1|DOYSAL|295	296	DOYSAL	103.536
search1|DOZZOI|296	297	DOZZOI	98.616
search1|DOZZOI|297	298	DOZZOI	99.95
search1|DPMPDS10|298	299	DPMPDS10	108.445
search1|DPMPDS10|299	300	DPMPDS10	108.004
search1|DTCPPD10|300	301	DTCPPD10	99.189
search1|DUCCEJ|301	302	DUCCEJ	103.955
search1|DUDPEX|302	303	DUDPEX	98.012
search1|DUDPEX|303	304	DUDPEX	100.405
search1|DUFFIU|304	305	DUFFIU	97.567
search1|DUFFIU|305	306	DUFFIU	98.26
search1|DUGXIM|306	307	DUGXIM	92.54
search1|DUHDOA|307	308	DUHDOA	97.298
search1|DUJXUC|308	309	DUJXUC	100.511
search1|DUJXUC|309	310	DUJXUC	97.399
search1|DUJXUC|310	311	DUJXUC	103.376
search1|DUJXUC|311	312	DUJXUC	102.767
search1|DUKCAO|312	313	DUKCAO	100.977
search1|DUKZEQ|313	314	DUKZEQ	102.504
search1|DUMDIZ|314	315	DUMDIZ	105.838
search1|DUMDIZ|315	316	DUMDIZ	104.357
search1|DUPFOJ10|316	317	DUPFOJ10	91.438
search1|DUPFOJ10|317	318	DUPFOJ10	96.3
search1|DUPFOJ10|318	319	DUPFOJ10	98.113
search1|DUPFOJ11|319	320	DUPFOJ11	89.778
search1|DUPFOJ11|320	321	DUPFOJ11	96.24
search1|DUPFOJ11|321	322	DUPFOJ11	98.096
search1|DUQSUE|322	323	DUQSUE	100.23
search1|DUQSUE|323	324	DUQSUE	100.658
search1|DUXZEC|324	325	DUXZEC	96.255
search1|DUXZEC|325	326	DUXZEC	99.87
search1|DUXZEC|326	327	DUXZEC	103.066
search1|DUXZEC|327	328	DUXZEC	98.191
search1|DUXZEC|328	329	DUXZEC	108.598
search1|DUYPUK|329	330	DUYPUK	94.895
search1|EBATUY|330	331	EBATUY	99.563
search1|EBATUY|331	332	EBATUY	96.512
search1|EBATUY|332	333	EBATUY	96.169
search1|EBEBUK|333	334	EBEBUK	100.416
search1|EBEYIV|334	335	EBEYIV	99.495
search1|EBIXAP|335	336	EBIXAP	93.25
search1|EBOKOX|336	337	EBOKOX	97.684
search1|EBOKOX|337	338	EBOKOX	101.706
search1|EBOKUD|338	339	EBOKUD	99.994
search1|EBOKUD|339	340	EBOKUD	101.511
search1|EBOMIR|340	341	EBOMIR	102.652
search1|EBOMIR|341	342	EBOMIR	103.382
search1|EBOMOX|342	343	EBOMOX	100.949
search1|EBOMUD|343	344	EBOMUD	102.884
search1|EBOMUD|344	345	EBOMUD	101.221
search1|ECABUH|345	346	ECABUH	98.163
search1|ECABUH|346	347	ECABUH	98.856
search1|ECABUH|347	348	ECABUH	97.492
search1|EFECIC|348	349	EFECIC	98.561
search1|EFECIC|349	350	EFECIC	95.313
search1|EFUGAO|350	351	EFUGAO	104.113
search1|EFUGAO|351	352	EFUGAO	101.228
search1|EFUGAO|352	353	EFUGAO	108.258
search1|EFUGAO|353	354	EFUGAO	105.107
search1|EGAYUH|354	355	EGAYUH	104.527
search1|EHEYOF|355	356	EHEYOF	99.094
search1|EHUGIY|356	357	EHUGIY	102.778
search1|EHUGIY|357	358	EHUGIY	106.813
search1|EHUGIY|358	359	EHUGIY	105.968
search1|EJIHIQ|359	360	EJIHIQ	99.447
search1|EJOQAV|360	361	EJOQAV	101.996
search1|EKEGIK|361	362	EKEGIK	102.699
search1|ELEXAV|362	363	ELEXAV	95.55
search1|ELEXAV|363	364	ELEXAV	99.2
search1|ELEXAV|364	365	ELEXAV	94.923
search1|ELEXAV|365	366	ELEXAV	101.724
search1|ELEXEZ|366	367	ELEXEZ	99.209
search1|EMEMUF|367	368	EMEMUF	92.32
search1|EMENUF|368	369	EMENUF	99.489
search1|EMENUF|369	370	EMENUF	101.709
search1|EMEZIF|370	371	EMEZIF	87.751
search1|EMUVOX|371	372	EMUVOX	106.273
search1|EMUVUD|372	373	EMUVUD	107.93
search1|EMUVUD|373	374	EMUVUD	104.466
search1|ENHGTC10|374	375	ENHGTC10	95.258
search1|ENHGTC10|375	376	ENHGTC10	97.879
search1|ENNIPC01|376	377	ENNIPC01	101.209
search1|EPIRUS|377	378	EPIRUS	108.748
search1|EQUHED|378	379	EQUHED	99.833
search1|EQUHED|379	380	EQUHED	95.372
search1|ERARIY|380	381	ERARIY	111.281
search1|ERAROE|381	382	ERAROE	110.538
search1|ETAKOZ|382	383	ETAKOZ	104.357
search1|ETAKUF|383	384	ETAKUF	105.279
search1|ETARAS|384	385	ETARAS	97.074
search1|ETARAS|385	386	ETARAS	96.703
search1|ETCDTH|386	387	ETCDTH	109.139
search1|EVOKUV|387	388	EVOKUV	87.215
search1|EYAGAN|388	389	EYAGAN	97.744
search1|EYAGER|389	390	EYAGER	97.423
search1|EYAGER|390	391	EYAGER	95.859
search1|FAJCOI|391	392	FAJCOI	102.127
search1|FAJSOA|392	393	FAJSOA	93.617
search1|FAJSOA|393	394	FAJSOA	102.061
search1|FAKJOQ|394	395	FAKJOQ	111.4
search1|FAMZAU|395	396	FAMZAU	96.873
search1|FAPCOO01|396	397	FAPCOO01	99.323
search1|FAPCOO01|397	398	FAPCOO01	96.49
search1|FAPFAF|398	399	FAPFAF	100.124
search1|FAPFAF|399	400	FAPFAF	99.424
search1|FAPFAF|400	401	FAPFAF	99.005
search1|FAPFAF|401	402	FAPFAF	103.622
search1|FAPFEJ|402	403	FAPFEJ	95.662
search1|FAPFIN|403	404	FAPFIN	100.17
search1|FAPFIN|404	405	FAPFIN	96.481
search1|FARPUJ|405	406	FARPUJ	101.242
search1|FARXEC|406	407	FARXEC	99.466
search1|FARXEC|407	408	FARXEC	101.113
search1|FARXIG|408	409	FARXIG	99.744
search1|FARXIG|409	410	FARXIG	101.331
search1|FARXOM|410	411	FARXOM	99.956
search1|FARXOM|411	412	FARXOM	102.432
search1|FARXUS|412	413	FARXUS	102.367
search1|FARXUS|413	414	FARXUS	102.122
search1|FARXUS|414	415	FARXUS	100.524
search1|FARYAZ|415	416	FARYAZ	102.235
search1|FARYAZ|416	417	FARYAZ	101.934
search1|FARYAZ|417	418	FARYAZ	101.23
search1|FARYED|418	419	FARYED	100.496
search1|FARYED|419	420	FARYED	99.768
search1|FARYED|420	421	FARYED	101.615
search1|FARYIH|421	422	FARYIH	101.631
search1|FARYIH|422	423	FARYIH	101.173
search1|FARYIH|423	424	FARYIH	102.091
search1|FARYON|424	425	FARYON	101.339
search1|FARYON|425	426	FARYON	101.355
search1|FARYON|426	427	FARYON	101.929
search1|FARYUT|427	428	FARYUT	102.74
search1|FARYUT|428	429	FARYUT	100.554
search1|FARYUT|429	430	FARYUT	100.932
search1|FARYUT|430	431	FARYUT	101.101
search1|FARYUT|431	432	FARYUT	100.756
search1|FARZAA|432	433	FARZAA	101.356
search1|FARZAA|433	434	FARZAA	100.136
search1|FARZEE|434	435	FARZEE	101.024
search1|FARZEE|435	436	FARZEE	100.319
search1|FARZII|436	437	FARZII	100.753
search1|FARZII|437	438	FARZII	100.81
search1|FARZOO|438	439	FARZOO	100.822
search1|FARZOO|439	440	FARZOO	99.5
search1|FARZUU|440	441	FARZUU	101.971
search1|FARZUU|441	442	FARZUU	100.171
search1|FASBAD|442	443	FASBAD	101.161
search1|FASBAD|443	444	FASBAD	99.784
search1|FASBEH|444	445	FASBEH	101.297
search1|FASBEH|445	446	FASBEH	100.579
search1|FASBIL|446	447	FASBIL	101.018
search1|FASBIL|447	448	FASBIL	100.077
search1|FASBOR|448	449	FASBOR	101.393
search1|FASBOR|449	450	FASBOR	99.779
search1|FASCOT|450	451	FASCOT	99.349
search1|FASCOT|451	452	FASCOT	99.487
search1|FASCOT|452	453	FASCOT	100.086
search1|FASCUZ|453	454	FASCUZ	98.079
search1|FASCUZ|454	455	FASCUZ	97.841
search1|FASCUZ|455	456	FASCUZ	98.48
search1|FASCUZ01|456	457	FASCUZ01	98.545
search1|FASCUZ01|457	458	FASCUZ01	98.226
search1|FASCUZ01|458	459	FASCUZ01	98.654
search1|FASNAO|459	460	FASNAO	101.183
search1|FASZIK|460	461	FASZIK	101.011
search1|FASZUV|461	462	FASZUV	100.962
search1|FASZUV|462	463	FASZUV	99.721
search1|FAWZUZ|463	464	FAWZUZ	102.26
search1|FAZQOM|464	465	FAZQOM	104.474
search1|FAZQOM|465	466	FAZQOM	93.972
search1|FAZQOM|466	467	FAZQOM	97.93
search1|FECTUC|467	468	FECTUC	98.522
search1|FEFZOF|468	469	FEFZOF	96.725
search1|FEFZOF|469	470	FEFZOF	94.929
search1|FEFZOF|470	471	FEFZOF	93.98
search1|FEFZOF|471	472	FEFZOF	95.713
search1|FEGFAY|472	473	FEGFAY	98.652
search1|FEGFEC|473	474	FEGFEC	92.673
search1|FEGFEC|474	475	FEGFEC	98.271
search1|FEGFEC|475	476	FEGFEC	96.077
search1|FEGKIN|476	477	FEGKIN	98.727
search1|FEGKIN|477	478	FEGKIN	98.53
search1|FEGKIN|478	479	FEGKIN	98.351
search1|FEGKIN|479	480	FEGKIN	96.651
search1|FEGKIN|480	481	FEGKIN	98.588
search1|FEGKIN|481	482	FEGKIN	95.984
search1|FEGKIN|482	483	FEGKIN	99.57
search1|FEGKIN|483	484	FEGKIN	97.511
search1|FEGKOT|484	485	FEGKOT	97.327
search1|FEGKOT|485	486	FEGKOT	101.176
search1|FEGKOT|486	487	FEGKOT	96.682
search1|FEGKUZ|487	488	FEGKUZ	106.888
search1|FEGLOU|488	489	FEGLOU	98.659
search1|FEGLOU01|489	490	FEGLOU01	99.722
search1|FEGLOU01|490	491	FEGLOU01	99.062
search1|FEGLUA|491	492	FEGLUA	98.95
search1|FEGLUA|492	493	FEGLUA	101.993
search1|FEGLUA|493	494	FEGLUA	98.39
search1|FEJJIO|494	495	FEJJIO	93.059
search1|FEJJIO|495	496	FEJJIO	94.017
search1|FEJKAI|496	497	FEJKAI	96.376
search1|FEJKAI|497	498	FEJKAI	93.883
search1|FEJKEM|498	499	FEJKEM	100.574
search1|FEJKIQ|499	500	FEJKIQ	95.136
search1|FEJKIQ|500	501	FEJKIQ	97.982
search1|FEJKIQ|501	502	FEJKIQ	102.17
search1|FEJKIQ|502	503	FEJKIQ	100.623
search1|FETLUM|503	504	FETLUM	100.513
search1|FETLUM|504	505	FETLUM	103.884
search1|FEZKIE|505	506	FEZKIE	99.931
search1|FIGQIW|506	507	FIGQIW	100.363
search1|FIGQIW|507	508	FIGQIW	111.899
search1|FIWVEN|508	509	FIWVEN	105.489
search1|FIWVEN|509	510	FIWVEN	100.408
search1|FIWWEO|510	511	FIWWEO	114.564
search1|FIWWEO|511	512	FIWWEO	109.604
search1|FIWWEO|512	513	FIWWEO	109.434
search1|FIWWEO|513	514	FIWWEO	112.866
search1|FODKOZ|514	515	FODKOZ	99.477
search1|FODKOZ|515	516	FODKOZ	99.252
search1|FODKOZ|516	517	FODKOZ	101.091
search1|FODKOZ|517	518	FODKOZ	103.286
search1|FODLOZ|518	519	FODLOZ	106.924
search1|FOGVEC|519	520	FOGVEC	103.973
search1|FOLKOG|520	521	FOLKOG	102.963
search1|FOLKOG01|521	522	FOLKOG01	95.391
search1|FOLKOG02|522	523	FOLKOG02	102.712
search1|FOQMAZ|523	524	FOQMAZ	109.485
search1|FOTNAF|524	525	FOTNAF	98.844
search1|FOTNAF|525	526	FOTNAF	99.484
search1|FOVDIF|526	527	FOVDIF	98.397
search1|FOVDIF|527	528	FOVDIF	100.54
search1|FOVDOL|528	529	FOVDOL	98.519
search1|FOVDOL|529	530	FOVDOL	97.782
search1|FOVDOL|530	531	FOVDOL	95.455
search1|FOVDOL|531	532	FOVDOL	99.703
search1|FOVDOL|532	533	FOVDOL	100.584
search1|FOVDOL|533	534	FOVDOL	103.962
search1|FOVDOL|534	535	FOVDOL	105.264
search1|FOVDOL|535	536	FOVDOL	100.811
search1|FOVJIK|536	537	FOVJIK	95.534
search1|FOVJIK|537	538	FOVJIK	96.73
search1|FOVJIK|538	539	FOVJIK	95.133
search1|FOVJIK|539	540	FOVJIK	98.421
search1|FOVKOR|540	541	FOVKOR	97.976
search1|FOVKOR|541	542	FOVKOR	96.174
search1|FOVKOR|542	543	FOVKOR	96.496
search1|FOVKOR|543	544	FOVKOR	97.208
search1|FUDXIL|544	545	FUDXIL	108.951
search1|FUDXIL|545	546	FUDXIL	107.31
search1|FUDXIL01|546	547	FUDXIL01	107.321
search1|FUGMOJ|547	548	FUGMOJ	97.74
search1|FUHPUT|548	549	FUHPUT	102.55
search1|GABNAY|549	550	GABNAY	99.553
search1|GABNAY|550	551	GABNAY	99.269
search1|GABNAY|551	552	GABNAY	99.764
search1|GABNAY|552	553	GABNAY	100.611
search1|GABNAY|553	554	GABNAY	99.331
search1|GABNAY|554	555	GABNAY	99.747
search1|GABNAY|555	556	GABNAY	96.823
search1|GABNAY|556	557	GABNAY	99.978
search1|GABNEC|557	558	GABNEC	107.2
search1|GABNEC|558	559	GABNEC	107.429
search1|GABNEC|559	560	GABNEC	105.85
search1|GARREY|560	561	GARREY	105.096
search1|GARREY|561	562	GARREY	103.526
search1|GASYAB|562	563	GASYAB	106.837
search1|GASYAB|563	564	GASYAB	106.168
search1|GASYAB|564	565	GASYAB	106.877
search1|GAVDOX|565	566	GAVDOX	106.844
search1|GAVDOX|566	567	GAVDOX	100.775
search1|GAVDOX|567	568	GAVDOX	107.877
search1|GAWKUM|568	569	GAWKUM	102.839
search1|GAWKUM|569	570	GAWKUM	103.294
search1|GEBYET|570	571	GEBYET	99.495
search1|GEBYET01|571	572	GEBYET01	104.195
search1|GEGFIH|572	573	GEGFIH	96.73
search1|GEGFIH|573	574	GEGFIH	102.46
search1|GEJLIQ|574	575	GEJLIQ	97.597
search1|GEJLIQ|575	576	GEJLIQ	96.548
search1|GEJLIQ|576	577	GEJLIQ	98.504
search1|GEJLIQ|577	578	GEJLIQ	97.758
search1|GEJLOW|578	579	GEJLOW	95.304
search1|GEJLOW|579	580	GEJLOW	97.742
search1|GEJLOW|580	581	GEJLOW	98.295
search1|GEJLOW|581	582	GEJLOW	99.368
search1|GEJTAS|582	583	GEJTAS	100.686
search1|GEJTAS|583	584	GEJTAS	100.612
search1|GEWYUE|584	585	GEWYUE	104.302
search1|GEWYUE|585	586	GEWYUE	98.353
search1|GEWYUE|586	587	GEWYUE	99.941
search1|GIDVIA|587	588	GIDVIA	101.203
search1|GIFGOT|588	589	GIFGOT	97.878
search1|GIFGUZ|589	590	GIFGUZ	97.159
search1|GIFHAG|590	591	GIFHAG	98.748
search1|GIFHAG|591	592	GIFHAG	96.178
search1|GIFHEK|592	593	GIFHEK	101.697
search1|GIFHIO|593	594	GIFHIO	99.962
search1|GIHMIT|594	595	GIHMIT	105.196
search1|GIHMIT|595	596	GIHMIT	109.628
search1|GIJMOC|596	597	GIJMOC	100.71
search1|GIJMOC|597	598	GIJMOC	101.287
search1|GIMGUE|598	599	GIMGUE	106.126
search1|GIMGUE|599	600	GIMGUE	105.668
search1|GIMGUE|600	601	GIMGUE	108.852
search1|GIMGUE|601	602	GIMGUE	108.935
search1|GIWKON|602	603	GIWKON	102.519
search1|GIWKON|603	604	GIWKON	93.241
search1|GIWKON|604	605	GIWKON	95.107
search1|GIWKON|605	606	GIWKON	103.25
search1|GIWMOP|606	607	GIWMOP	98.763
search1|GIWMOP|607	608	GIWMOP	97.739
search1|GIWZES|608	609	GIWZES	97.488
search1|GIWZES|609	610	GIWZES	104.859
search1|GIWZES|610	611	GIWZES	98.613
search1|GOBDUW|611	612	GOBDUW	100.08
search1|GOBDUW|612	613	GOBDUW	102.329
search1|GOBDUW|613	614	GOBDUW	100.67
search1|GOBDUW|614	615	GOBDUW	97.068
search1|GOBFEI|615	616	GOBFEI	102.205
search1|GOBFEI|616	617	GOBFEI	100.991
search1|GOBFEI01|617	618	GOBFEI01	101.899
search1|GOBFEI01|618	619	GOBFEI01	100.566
search1|GOCNIW|619	620	GOCNIW	110.604
search1|GOCRAS|620	621	GOCRAS	97.92
search1|GOCRAS|621	622	GOCRAS	98.512
search1|GODMAN|622	623	GODMAN	98.38
search1|GODMAN|623	624	GODMAN	109.798
search1|GODSAU|624	625	GODSAU	107.101
search1|GODSAU|625	626	GODSAU	96.712
search1|GOVDIG|626	627	GOVDIG	108.092
search1|GUBMAS|627	628	GUBMAS	89.667
search1|GUHGUM|628	629	GUHGUM	99.697
search1|GUHGUM|629	630	GUHGUM	100.795
search1|GUHGUM|630	631	GUHGUM	99.085
search1|GUHGUM|631	632	GUHGUM	103.253
search1|GUHGUM|632	633	GUHGUM	102.533
search1|GUHGUM|633	634	GUHGUM	99.037
search1|GUHGUM|634	635	GUHGUM	97.502
search1|GUHGUM|635	636	GUHGUM	97.316
search1|GUHGUM|636	637	GUHGUM	97.497
search1|GUHGUM|637	638	GUHGUM	103.351
search1|GUHGUM|638	639	GUHGUM	101.749
search1|GUHGUM|639	640	GUHGUM	100.435
search1|GUKLOO|640	641	GUKLOO	93.603
search1|GUKLOO|641	642	GUKLOO	93.159
search1|GURQEP01|642	643	GURQEP01	107.298
search1|GURQEP01|643	644	GURQEP01	110.144
search1|GUVKOZ|644	645	GUVKOZ	99.821
search1|GUYZAD|645	646	GUYZAD	97.209
search1|GUYZAD|646	647	GUYZAD	98.241
search1|GUYZEH|647	648	GUYZEH	94.164
search1|GUYZEH|648	649	GUYZEH	98.948
search1|GUYZEH|649	650	GUYZEH	94.812
search1|GUYZEH|650	651	GUYZEH	94.134
search1|GUYZIL|651	652	GUYZIL	99.801
search1|GUZNUM|652	653	GUZNUM	96.613
search1|GUZNUM|653	654	GUZNUM	100.078
search1|HAVTEE|654	655	HAVTEE	99.768
search1|HAVTEE|655	656	HAVTEE	82.355
search1|HAVTEE|656	657	HAVTEE	80.576
search1|HAYMUR|657	658	HAYMUR	98.393
search1|HEDJAD|658	659	HEDJAD	103.829
search1|HEDWIW|659	660	HEDWIW	106.872
search1|HEFYUN|660	661	HEFYUN	100.06
search1|HEGTEU|661	662	HEGTEU	102.419
search1|HEGZEA|662	663	HEGZEA	104.359
search1|HEVCIU|663	664	HEVCIU	103.562
search1|HEVCIU01|664	665	HEVCIU01	104.668
search1|HEVQOP|665	666	HEVQOP	97.509
search1|HGCNCO|666	667	HGCNCO	99.063
search1|HGCNCO|667	668	HGCNCO	96.407
search1|HGCNCO|668	669	HGCNCO	97.691
search1|HGCNCO|669	670	HGCNCO	92.756
search1|HGTHUR|670	671	HGTHUR	98.398
search1|HGTHUR|671	672	HGTHUR	117.02
search1|HGTHUR01|672	673	HGTHUR01	86.23
search1|HGTHUR01|673	674	HGTHUR01	99.411
search1|HIJZIL|674	675	HIJZIL	109.898
search1|HIJZOR|675	676	HIJZOR	100.804
search1|HIJZUX|676	677	HIJZUX	104.392
search1|HIJZUX|677	678	HIJZUX	105.142
search1|HILMEW|678	679	HILMEW	105.37
search1|HINROL|679	680	HINROL	100.529
search1|HIXFID|680	681	HIXFID	100.374
search1|HIXFID|681	682	HIXFID	97.815
search1|HIXFID|682	683	HIXFID	95.932
search1|HIXFID|683	684	HIXFID	98.894
search1|HIZXAR|684	685	HIZXAR	102.571
search1|HOLHIB|685	686	HOLHIB	96.062
search1|HOPJEB|686	687	HOPJEB	94.261
search1|HOSQEM|687	688	HOSQEM	102.001
search1|HOSQEM|688	689	HOSQEM	97.878
search1|HOYMUD|689	690	HOYMUD	103.397
search1|HOYMUD|690	691	HOYMUD	93.54
search1|HOYMUD01|691	692	HOYMUD01	103.768
search1|HOYMUD01|692	693	HOYMUD01	93.211
search1|HUFRAB|693	694	HUFRAB	111.057
search1|HUFRAB|694	695	HUFRAB	107.426
search1|HUKWUG|695	696	HUKWUG	101.915
search1|HUNHEF|696	697	HUNHEF	101.764
search1|HUTHOU|697	698	HUTHOU	94.942
search1|HUTHOU|698	699	HUTHOU	94.732
search1|HUYJUH|699	700	HUYJUH	104.02
search1|HUYJUH|700	701	HUYJUH	103.693
search1|IBAZIW|701	702	IBAZIW	105.861
search1|IBEMAF|702	703	IBEMAF	100.481
search1|ICABIZ|703	704	ICABIZ	98.209
search1|ICACAS|704	705	ICACAS	104.841
search1|ICACEW|705	706	ICACEW	110.765
search1|ICACEW|706	707	ICACEW	104.977
search1|ICACIA|707	708	ICACIA	103.753
search1|ICACOG|708	709	ICACOG	102.297
search1|ICACUM|709	710	ICACUM	98.763
search1|ICADEX|710	711	ICADEX	109.673
search1|ICORUN|711	712	ICORUN	100.194
search1|IDAXER|712	713	IDAXER	109.601
search1|IDAXER|713	714	IDAXER	110.057
search1|IDOMOE|714	715	IDOMOE	104.068
search1|IDOWUV|715	716	IDOWUV	100.481
search1|IDOWUV|716	717	IDOWUV	98.846
search1|IDOWUV|717	718	IDOWUV	98.839
search1|IDOWUV|718	719	IDOWUV	102.42
search1|IDOXAC|719	720	IDOXAC	96.804
search1|IDUTIL|720	721	IDUTIL	95.849
search1|IDUTIL|721	722	IDUTIL	103.079
search1|IFAFOL|722	723	IFAFOL	99.677
search1|IFAFOL|723	724	IFAFOL	98.134
search1|IFAFOL|724	725	IFAFOL	99.077
search1|IFAFOL|725	726	IFAFOL	102.2
search1|IFAFOL|726	727	IFAFOL	94.815
search1|IFAFOL|727	728	IFAFOL	95.252
search1|IFEYIB|728	729	IFEYIB	95.946
search1|IFUKUQ|729	730	IFUKUQ	101.069
search1|IFUKUQ|730	731	IFUKUQ	98.641
search1|IFUKUQ|731	732	IFUKUQ	96.497
search1|IJECIJ|732	733	IJECIJ	101.09
search1|IJECIJ|733	734	IJECIJ	96.805
search1|IJIXEE|734	735	IJIXEE	109.105
search1|IJIXEE|735	736	IJIXEE	102.594
search1|IJOLOJ|736	737	IJOLOJ	102.784
search1|IJOLOJ01|737	738	IJOLOJ01	103.165
search1|IJUBUK|738	739	IJUBUK	103.052
search1|IJUBUK|739	740	IJUBUK	98.223
search1|ILETOI|740	741	ILETOI	104.771
search1|ILIFIS|741	742	ILIFIS	100.913
search1|IMEYOP|742	743	IMEYOP	96.887
search1|IMEYOP|743	744	IMEYOP	107.8
search1|IMEYOP|744	745	IMEYOP	96.29
search1|IMEYOP|745	746	IMEYOP	110.701
search1|IMEYUV|746	747	IMEYUV	107.544
search1|IMEYUV|747	748	IMEYUV	92.484
search1|IMINID|748	749	IMINID	98.165
search1|IMINID|749	750	IMINID	102.311
search1|INESIF|750	751	INESIF	97.862
search1|INESIF|751	752	INESIF	98.215
search1|INESIF|752	753	INESIF	96.69
search1|INESIF|753	754	INESIF	97.38
search1|INESIF|754	755	INESIF	101.121
search1|INESIF|755	756	INESIF	101.211
search1|INESIF|756	757	INESIF	97.427
search1|INESIF|757	758	INESIF	95.892
search1|IPOFOK|758	759	IPOFOK	99.908
search1|IPOFOK|759	760	IPOFOK	102.976
search1|IQOZAP|760	761	IQOZAP	96.065
search1|IRIWEL|761	762	IRIWEL	103.4
search1|IRIWEL|762	763	IRIWEL	100.733
search1|IRIWIP|763	764	IRIWIP	96.685
search1|ISUJEL|764	765	ISUJEL	109.927
search1|ISUMUF|765	766	ISUMUF	98.923
search1|ISUMUF|766	767	ISUMUF	97.906
search1|ISUMUF|767	768	ISUMUF	93.725
search1|ISUMUF|768	769	ISUMUF	95.836
search1|ISUNAM|769	770	ISUNAM	104.296
search1|ISUNAM|770	771	ISUNAM	97.312
search1|ISUNAM|771	772	ISUNAM	96.022
search1|ISUNAM|772	773	ISUNAM	98.327
search1|IVOWOF|773	774	IVOWOF	98.637
search1|IVOWOF|774	775	IVOWOF	111.044
search1|IVOWOF|775	776	IVOWOF	98.295
search1|IVOWOF|776	777	IVOWOF	98.555
search1|IVOWOF|777	778	IVOWOF	96.757
search1|IVOWOF|778	779	IVOWOF	100.027
search1|IVOWOF|779	780	IVOWOF	111.922
search1|IVOWUL|780	781	IVOWUL	107.656
search1|IVOWUL|781	782	IVOWUL	110.625
search1|IWABUD|782	783	IWABUD	99.403
search1|IWABUD|783	784	IWABUD	108.206
search1|IWOWAS|784	785	IWOWAS	99.807
search1|IWUVOM|785	786	IWUVOM	101.282
search1|IXABOY|786	787	IXABOY	97.097
search1|IXIDEY|787	788	IXIDEY	100.315
search1|IXIDEY|788	789	IXIDEY	101.333
search1|IXUKER|789	790	IXUKER	95.987
search1|IXUKER|790	791	IXUKER	98.319
search1|IZATOS|791	792	IZATOS	106.889
search1|JAJSUJ|792	793	JAJSUJ	95.619
search1|JAJSUJ|793	794	JAJSUJ	91.45
search1|JAJSUJ|794	795	JAJSUJ	93.922
search1|JAJSUJ|795	796	JAJSUJ	99.521
search1|JAJTAQ|796	797	JAJTAQ	100.248
search1|JAJTEU|797	798	JAJTEU	93.435
search1|JAJTIY|798	799	JAJTIY	90.392
search1|JAJTIY|799	800	JAJTIY	95.447
search1|JAPGIQ|800	801	JAPGIQ	97.173
search1|JAPKEQ|801	802	JAPKEQ	99.984
search1|JAPKEQ|802	803	JAPKEQ	100.883
search1|JAPZUV|803	804	JAPZUV	100.009
search1|JAPZUV|804	805	JAPZUV	95.892
search1|JATVIJ|805	806	JATVIJ	101.697
search1|JAVPAX|806	807	JAVPAX	104.804
search1|JAVPAX|807	808	JAVPAX	98.755
search1|JAVPAX|808	809	JAVPAX	103.503
search1|JAVPAX|809	810	JAVPAX	96.656
search1|JAWDUH|810	811	JAWDUH	96.599
search1|JEPKAR|811	812	JEPKAR	101.783
search1|JEPKAR|812	813	JEPKAR	108.503
search1|JESZOW01|813	814	JESZOW01	88.259
search1|JESZOW01|814	815	JESZOW01	97.791
search1|JESZOW01|815	816	JESZOW01	99.782
search1|JETZUE|816	817	JETZUE	100.513
search1|JETZUE|817	818	JETZUE	97.293
search1|JETZUE01|818	819	JETZUE01	102.706
search1|JETZUE01|819	820	JETZUE01	94.872
search1|JEVNAZ|820	821	JEVNAZ	100.917
search1|JIRNII|821	822	JIRNII	102.753
search1|JIVXUH|822	823	JIVXUH	97.591
search1|JIZHIL|823	824	JIZHIL	96.86
search1|JIZHIL|824	825	JIZHIL	99.796
search1|JOGHAQ|825	826	JOGHAQ	98.777
search1|JONYOA|826	827	JONYOA	104.768
search1|JONYOA|827	828	JONYOA	102.169
search1|JOWJUC|828	829	JOWJUC	95.285
search1|JOZBEF|829	830	JOZBEF	91.704
search1|JOZBEF|830	831	JOZBEF	94.11
search1|JUGMOP|831	832	JUGMOP	100.449
search1|KABFUO|832	833	KABFUO	97.757
search1|KABFUO|833	834	KABFUO	99.469
search1|KAFKOS|834	835	KAFKOS	95.859
search1|KAFKOS|835	836	KAFKOS	93.804
search1|KAFKOS|836	837	KAFKOS	94.085
search1|KAFKOS|837	838	KAFKOS	96.672
search1|KAFKUY|838	839	KAFKUY	95.489
search1|KAFKUY|839	840	KAFKUY	95.581
search1|KAFLAF|840	841	KAFLAF	114.363
search1|KAFLEJ|841	842	KAFLEJ	115.399
search1|KAGHAB|842	843	KAGHAB	98.375
search1|KAKNOZ|843	844	KAKNOZ	101.768
search1|KAKNOZ|844	845	KAKNOZ	94.757
search1|KAKNOZ|845	846	KAKNOZ	95.413
search1|KAKNOZ|846	847	KAKNOZ	103.497
search1|KAMROF|847	848	KAMROF	99.575
search1|KAMRUL|848	849	KAMRUL	98.27
search1|KAMRUL|849	850	KAMRUL	100.813
search1|KAPDAI|850	851	KAPDAI	95.315
search1|KAPDEM|851	852	KAPDEM	101.901
search1|KARROL|852	853	KARROL	99.167
search1|KAZPAD|853	854	KAZPAD	96.089
search1|KELKUI|854	855	KELKUI	101.233
search1|KEMWIK|855	856	KEMWIK	97.34
search1|KETNUT|856	857	KETNUT	96.597
search1|KETNUT|857	858	KETNUT	99.05
search1|KETNUT|858	859	KETNUT	101.334
search1|KETNUT01|859	860	KETNUT01	106.675
search1|KETNUT01|860	861	KETNUT01	100.975
search1|KETNUT01|861	862	KETNUT01	100.797
search1|KETPAB|862	863	KETPAB	100.266
search1|KETPAB|863	864	KETPAB	99.696
search1|KETPAB|864	865	KETPAB	100.778
search1|KETPAB|865	866	KETPAB	93.415
search1|KETPEF|866	867	KETPEF	94.72
search1|KETPEF|867	868	KETPEF	94.447
search1|KETPEF|868	869	KETPEF	98.31
search1|KETPEF|869	870	KETPEF	100.395
search1|KEXFOJ|870	871	KEXFOJ	107.205
search1|KEXFOJ|871	872	KEXFOJ	101.943
search1|KEYLOP|872	873	KEYLOP	104.617
search1|KEYWOC|873	874	KEYWOC	98.208
search1|KEYWOC|874	875	KEYWOC	98.006
search1|KEYWOC|875	876	KEYWOC	97.279
search1|KIBLEN|876	877	KIBLEN	101.869
search1|KIBLEN|877	878	KIBLEN	97.898
search1|KIBLEN|878	879	KIBLEN	107.261
search1|KIBLEN|879	880	KIBLEN	99.695
search1|KIBSUK|880	881	KIBSUK	97.656
search1|KIBSUK|881	882	KIBSUK	97.046
search1|KIBSUK|882	883	KIBSUK	96.911
search1|KIBSUK|883	884	KIBSUK	96.921
search1|KICHAH|884	885	KICHAH	112.474
search1|KICHAH|885	886	KICHAH	100.528
search1|KICHAH|886	887	KICHAH	97.707
search1|KICHAH|887	888	KICHAH	99.553
search1|KIFHAJ|888	889	KIFHAJ	107.935
search1|KIFLER|889	890	KIFLER	96.562
search1|KIFLER|890	891	KIFLER	103.616
search1|KIFLER|891	892	KIFLER	102.285
search1|KIFLER|892	893	KIFLER	95.922
search1|KIFLER|893	894	KIFLER	104.1
search1|KIFLER|894	895	KIFLER	102.088
search1|KIHPIA|895	896	KIHPIA	102.233
search1|KISSEL|896	897	KISSEL	101.346
search1|KISSIP|897	898	KISSIP	102.694
search1|KISSIP|898	899	KISSIP	99.322
search1|KISSOV|899	900	KISSOV	101.242
search1|KISSOV|900	901	KISSOV	95.93
search1|KISZES|901	902	KISZES	111.455
search1|KITBIY|902	903	KITBIY	100.11
search1|KITBIY|903	904	KITBIY	96.802
search1|KITBIY|904	905	KITBIY	96.502
search1|KITBIY|905	906	KITBIY	97.93
search1|KITBOE|906	907	KITBOE	105.935
search1|KITBOE|907	908	KITBOE	98.237
search1|KITFUP|908	909	KITFUP	94.274
search1|KITFUP|909	910	KITFUP	98.223
search1|KIVWAO|910	911	KIVWAO	106.151
search1|KIVWAO01|911	912	KIVWAO01	106.178
search1|KIZXUM|912	913	KIZXUM	95.151
search1|KOGPEC|913	914	KOGPEC	103.235
search1|KOGPEC|914	915	KOGPEC	98.891
search1|KOGPEC|915	916	KOGPEC	100.405
search1|KUBCAM|916	917	KUBCAM	100.777
search1|KUHQEK|917	918	KUHQEK	97.894
search1|KUHVIT|918	919	KUHVIT	104.197
search1|KUHVIT|919	920	KUHVIT	105.644
search1|KUJWIX|920	921	KUJWIX	102.731
search1|KUJWIX|921	922	KUJWIX	100.622
search1|KUMWIZ|922	923	KUMWIZ	102.979
search1|KUMWOF|923	924	KUMWOF	98.971
search1|KUMWOF|924	925	KUMWOF	108.212
search1|KUSVUR|925	926	KUSVUR	103.747
search1|KUTRAU|926	927	KUTRAU	103.409
search1|KUTRAU|927	928	KUTRAU	98.259
search1|KUTRAU|928	929	KUTRAU	100.137
search1|KUTRAU|929	930	KUTRAU	103.668
search1|KUTREY|930	931	KUTREY	97.795
search1|KUTREY|931	932	KUTREY	100.261
search1|KUTREY|932	933	KUTREY	97.789
search1|KUVZUX|933	934	KUVZUX	100.57
search1|KUVZUX|934	935	KUVZUX	99.701
search1|KUWLUJ|935	936	KUWLUJ	100.858
search1|KUWLUJ|936	937	KUWLUJ	95.234
search1|KUYMIB|937	938	KUYMIB	96.649
search1|KUYMIB|938	939	KUYMIB	99.713
search1|KUYSIH|939	940	KUYSIH	109.405
search1|KUYSIH|940	941	KUYSIH	99.649
search1|KXTCPT|941	942	KXTCPT	103.761
search1|LACLAF|942	943	LACLAF	100.958
search1|LAFMAG|943	944	LAFMAG	101.51
search1|LAFMAG02|944	945	LAFMAG02	103.989
search1|LATGIW|945	946	LATGIW	102.275
search1|LATYEM|946	947	LATYEM	100.339
search1|LAVSEI|947	948	LAVSEI	93.634
search1|LAVSEI|948	949	LAVSEI	98.926
search1|LAVSEI|949	950	LAVSEI	93.569
search1|LAVSEI|950	951	LAVSEI	97.882
search1|LAXXOZ|951	952	LAXXOZ	101.146
search1|LAXXOZ|952	953	LAXXOZ	96.589
search1|LAYJOM|953	954	LAYJOM	93.015
search1|LEDQER|954	955	LEDQER	94.267
search1|LEFSUL|955	956	LEFSUL	109.1
search1|LEFSUL|956	957	LEFSUL	106.093
search1|LEHFEL|957	958	LEHFEL	96.74
search1|LEJJAM|958	959	LEJJAM	102.818
search1|LEJJAM|959	960	LEJJAM	101.137
search1|LELYEG|960	961	LELYEG	102.268
search1|LELYEG01|961	962	LELYEG01	99.182
search1|LELYEG02|962	963	LELYEG02	99.65
search1|LELYEG03|963	964	LELYEG03	98.942
search1|LELYEG04|964	965	LELYEG04	98.897
search1|LELYEG05|965	966	LELYEG05	98.72
search1|LEMPIC|966	967	LEMPIC	105.937
search1|LERFOF|967	968	LERFOF	101.438
search1|LERFUL|968	969	LERFUL	99.263
search1|LERFUL|969	970	LERFUL	102.717
search1|LETLIF|970	971	LETLIF	100.664
search1|LETLIF|971	972	LETLIF	100.241
search1|LETLIF|972	973	LETLIF	96.935
search1|LEWJED|973	974	LEWJED	105.435
search1|LIPLOL|974	975	LIPLOL	102.075
search1|LIPLOL|975	976	LIPLOL	99.013
search1|LIPLOL|976	977	LIPLOL	103.088
search1|LIPLOL|977	978	LIPLOL	102.982
search1|LIXXEX|978	979	LIXXEX	101.769
search1|LIYLEK|979	980	LIYLEK	94.372
search1|LOFKUM|980	981	LOFKUM	110.607
search1|LOFKUM|981	982	LOFKUM	109.576
search1|LOFKUM|982	983	LOFKUM	109.946
search1|LOFKUM|983	984	LOFKUM	107.822
search1|LOHWEK|984	985	LOHWEK	98.828
search1|LOPFAY|985	986	LOPFAY	105.308
search1|LOPFAY|986	987	LOPFAY	103.033
search1|LOPSIS|987	988	LOPSIS	98.367
search1|LOPSIS|988	989	LOPSIS	110.022
search1|LOPSIS|989	990	LOPSIS	101.708
search1|LOPSOY|990	991	LOPSOY	96.658
search1|LOPSOY|991	992	LOPSOY	102.009
search1|LOPSOY|992	993	LOPSOY	98.118
search1|LOSBAX|993	994	LOSBAX	109.416
search1|LOSBAX|994	995	LOSBAX	110.978
search1|LOVSUK|995	996	LOVSUK	93.272
search1|LOVSUK|996	997	LOVSUK	100.107
search1|LOVSUK|997	998	LOVSUK	99.824
search1|LOVSUK|998	999	LOVSUK	95.94
search1|LOVTAR|999	1000	LOVTAR	102.109
search1|LOVTEV|1000	1001	LOVTEV	99.47
search1|LOVTOF|1001	1002	LOVTOF	100.889
search1|LOVTOF|1002	1003	LOVTOF	102.638
search1|LOVTOF|1003	1004	LOVTOF	102.318
search1|LUCTEJ|1004	1005	LUCTEJ	102.331
search1|LUCTEJ|1005	1006	LUCTEJ	97.073
search1|LUCTEJ|1006	1007	LUCTEJ	97.394
search1|LUCTEJ|1007	1008	LUCTEJ	100.265
search1|LUHLIJ|1008	1009	LUHLIJ	97.814
search1|LUHLIJ|1009	1010	LUHLIJ	94.488
search1|LUHLIJ|1010	1011	LUHLIJ	99.981
search1|LUHLIJ|1011	1012	LUHLIJ	99.99
search1|LUHLIJ|1012	1013	LUHLIJ	96.842
search1|LUHLIJ|1013	1014	LUHLIJ	97.877
search1|LUJPOV|1014	1015	LUJPOV	101.953
search1|LUJPOV|1015	1016	LUJPOV	101.238
search1|LUJPUB|1016	1017	LUJPUB	100.992
search1|LUJPUB|1017	1018	LUJPUB	100.811
search1|LUJQAI|1018	1019	LUJQAI	101.432
search1|LUJQAI|1019	1020	LUJQAI	97.935
search1|LUYRUS|1020	1021	LUYRUS	101.478
search1|LUYSAZ|1021	1022	LUYSAZ	102.598
search1|MAHQER|1022	1023	MAHQER	98.244
search1|MAJGAH|1023	1024	MAJGAH	98.061
search1|MAJGAH|1024	1025	MAJGAH	95.837
search1|MAJGAH|1025	1026	MAJGAH	100.845
search1|MAJGAH|1026	1027	MAJGAH	95.476
search1|MAJGAH|1027	1028	MAJGAH	96.701
search1|MAJGAH|1028	1029	MAJGAH	100.853
search1|MAJGAH|1029	1030	MAJGAH	101.842
search1|MAJGAH|1030	1031	MAJGAH	99.335
search1|MARGIX|1031	1032	MARGIX	90.66
search1|MARGIX|1032	1033	MARGIX	91.103
search1|MARGOD|1033	1034	MARGOD	113.793
search1|MARGOD|1034	1035	MARGOD	100.545
search1|MAXXEP|1035	1036	MAXXEP	101.675
search1|MAXXOZ|1036	1037	MAXXOZ	106.893
search1|MBYPPD|1037	1038	MBYPPD	97.969
search1|MEGLOA|1038	1039	MEGLOA	103.543
search1|MEGLOA|1039	1040	MEGLOA	96.484
search1|MEGLOA|1040	1041	MEGLOA	96.314
search1|MEGLOA|1041	1042	MEGLOA	100.244
search1|MEGLOA|1042	1043	MEGLOA	94.866
search1|MEGLOA|1043	1044	MEGLOA	94.088
search1|MEGLOA|1044	1045	MEGLOA	106.384
search1|MEGLOA|1045	1046	MEGLOA	98.724
search1|MEMYAF|1046	1047	MEMYAF	94.977
search1|MEQKOJ|1047	1048	MEQKOJ	103.189
search1|MEQKOJ|1048	1049	MEQKOJ	100.395
search1|MESHEX|1049	1050	MESHEX	101.195
search1|MESHEX|1050	1051	MESHEX	101.399
search1|MESHIB|1051	1052	MESHIB	100.614
search1|MESHIB|1052	1053	MESHIB	100.601
search1|MESWOW|1053	1054	MESWOW	97.111
search1|MESWOW|1054	1055	MESWOW	93.21
search1|MIMZOX|1055	1056	MIMZOX	102.041
search1|MIMZUD|1056	1057	MIMZUD	97.868
search1|MIMZUD|1057	1058	MIMZUD	102.222
search1|MIMZUD01|1058	1059	MIMZUD01	101.995
search1|MIMZUD01|1059	1060	MIMZUD01	97.966
search1|MIWZOI|1060	1061	MIWZOI	104.962
search1|MIWZOI|1061	1062	MIWZOI	105.586
search1|MIWZUO|1062	1063	MIWZUO	105.84
search1|MIWZUO|1063	1064	MIWZUO	105.852
search1|MOJBIX|1064	1065	MOJBIX	108.543
search1|MOJBIX|1065	1066	MOJBIX	105.9
search1|MOJFIA|1066	1067	MOJFIA	90.342
search1|MORGEG|1067	1068	MORGEG	92.862
search1|MOTLEM|1068	1069	MOTLEM	107.319
search1|MOTLIQ|1069	1070	MOTLIQ	102.243
search1|MOTLIQ|1070	1071	MOTLIQ	101.667
search1|MOTMAJ|1071	1072	MOTMAJ	109.523
search1|MOTMEN|1072	1073	MOTMEN	109.69
search1|MOTMIR|1073	1074	MOTMIR	101.917
search1|MOTMIR|1074	1075	MOTMIR	98.331
search1|MOTMIR01|1075	1076	MOTMIR01	100.828
search1|MOYHIS|1076	1077	MOYHIS	95.853
search1|MOZLIW|1077	1078	MOZLIW	101.607
search1|MOZLIW|1078	1079	MOZLIW	102.881
search1|MSIPTE|1079	1080	MSIPTE	110.309
search1|MTCCUE|1080	1081	MTCCUE	100.321
search1|MTCCUE|1081	1082	MTCCUE	103.794
search1|MTCCUE|1082	1083	MTCCUE	90.999
search1|MTCCUE|1083	1084	MTCCUE	86.763
search1|MUGVUH|1084	1085	MUGVUH	102.542
search1|MUGWAO|1085	1086	MUGWAO	98.556
search1|MUGWAO|1086	1087	MUGWAO	98.972
search1|MUGWAO|1087	1088	MUGWAO	101.272
search1|MUGWOC|1088	1089	MUGWOC	100.182
search1|MURQAT|1089	1090	MURQAT	96.244
search1|MURQAT|1090	1091	MURQAT	98.201
search1|MURQAT|1091	1092	MURQAT	101.84
search1|MURQEX|1092	1093	MURQEX	99.744
search1|MURQEX|1093	1094	MURQEX	105.968
search1|MURQEX|1094	1095	MURQEX	99.605
search1|MUSGUC|1095	1096	MUSGUC	106.524
search1|MUWJOF|1096	1097	MUWJOF	105.361
search1|MUWJOF|1097	1098	MUWJOF	107.06
search1|MUXCEP|1098	1099	MUXCEP	108.648
search1|MUXCEP|1099	1100	MUXCEP	96.513
search1|NAFSET|1100	1101	NAFSET	107.893
search1|NAFSET|1101	1102	NAFSET	107.231
search1|NAGPEQ|1102	1103	NAGPEQ	108.734
search1|NAGPEQ|1103	1104	NAGPEQ	106.915
search1|NAJNIY|1104	1105	NAJNIY	100.955
search1|NAJNIY|1105	1106	NAJNIY	102.779
search1|NAMCIP|1106	1107	NAMCIP	106.719
search1|NAMLUI|1107	1108	NAMLUI	101.663
search1|NAPFIT|1108	1109	NAPFIT	102.422
search1|NAPFIT|1109	1110	NAPFIT	93.873
search1|NAPFIT|1110	1111	NAPFIT	94.559
search1|NAPFIT|1111	1112	NAPFIT	101.853
search1|NAPFIT01|1112	1113	NAPFIT01	102.422
search1|NAPFIT01|1113	1114	NAPFIT01	93.873
search1|NAPFIT01|1114	1115	NAPFIT01	94.559
search1|NAPFIT01|1115	1116	NAPFIT01	101.853
search1|NEBCEE|1116	1117	NEBCEE	95.352
search1|NEBCEE|1117	1118	NEBCEE	100.325
search1|NEDKIQ01|1118	1119	NEDKIQ01	100.225
search1|NEKTEC|1119	1120	NEKTEC	104.773
search1|NEKTIG|1120	1121	NEKTIG	105.403
search1|NEKTIG|1121	1122	NEKTIG	107.113
search1|NEKXEH|1122	1123	NEKXEH	98.029
search1|NEKXEH|1123	1124	NEKXEH	99.067
search1|NELMIC|1124	1125	NELMIC	106.343
search1|NERHEX|1125	1126	NERHEX	84.115
search1|NEVYEU|1126	1127	NEVYEU	96.622
search1|NEVYIY|1127	1128	NEVYIY	96.395
search1|NEXGOM|1128	1129	NEXGOM	106.784
search1|NEXGOM|1129	1130	NEXGOM	109.858
search1|NEYJIK|1130	1131	NEYJIK	106.97
search1|NEYJIK|1131	1132	NEYJIK	103.099
search1|NEYJIK|1132	1133	NEYJIK	104.181
search1|NEYJIK|1133	1134	NEYJIK	103.987
search1|NEYJIK|1134	1135	NEYJIK	104.908
search1|NEYJIK|1135	1136	NEYJIK	103.257
search1|NIBDEH|1136	1137	NIBDEH	116.168
search1|NIBDEH|1137	1138	NIBDEH	101.493
search1|NIBPAR|1138	1139	NIBPAR	96.753
search1|NIBPAR|1139	1140	NIBPAR	96.542
search1|NIFBAH|1140	1141	NIFBAH	94.074
search1|NIFXIL|1141	1142	NIFXIL	98.622
search1|NIFXIL|1142	1143	NIFXIL	98.685
search1|NIFXOR|1143	1144	NIFXOR	96.269
search1|NIFXOR|1144	1145	NIFXOR	103.887
search1|NIFXUX|1145	1146	NIFXUX	100.141
search1|NIFYAE|1146	1147	NIFYAE	98.971
search1|NIFYAE|1147	1148	NIFYAE	97.276
search1|NILHIA|1148	1149	NILHIA	98.729
search1|NILLEA|1149	1150	NILLEA	102.346
search1|NILLEA|1150	1151	NILLEA	102.24
search1|NINHUO|1151	1152	NINHUO	99.228
search1|NINHUO|1152	1153	NINHUO	99.667
search1|NIQPIO|1153	1154	NIQPIO	105.748
search1|NIQPIO|1154	1155	NIQPIO	104.316
search1|NIQPOU|1155	1156	NIQPOU	106.651
search1|NIQPOU|1156	1157	NIQPOU	103.528
search1|NIQPUA|1157	1158	NIQPUA	108.687
search1|NIQPUA|1158	1159	NIQPUA	108.243
search1|NIQPUA|1159	1160	NIQPUA	100.938
search1|NIQPUA|1160	1161	NIQPUA	102.246
search1|NIQQAH|1161	1162	NIQQAH	107.669
search1|NIQQAH|1162	1163	NIQQAH	104.285
search1|NIQQEL|1163	1164	NIQQEL	108.604
search1|NIQQOV|1164	1165	NIQQOV	109.035
search1|NIQQOV|1165	1166	NIQQOV	103.696
search1|NIQQUB|1166	1167	NIQQUB	104.703
search1|NIQRAI|1167	1168	NIQRAI	106.635
search1|NIQRAI|1168	1169	NIQRAI	110.219
search1|NIQRAI|1169	1170	NIQRAI	110.257
search1|NIQRAI|1170	1171	NIQRAI	109.241
search1|NIQREM|1171	1172	NIQREM	98.252
search1|NIQRIQ|1172	1173	NIQRIQ	110.289
search1|NIQROW|1173	1174	NIQROW	104.631
search1|NIVBID|1174	1175	NIVBID	103.154
search1|NIVBID|1175	1176	NIVBID	104.833
search1|NIYWEY|1176	1177	NIYWEY	96.387
search1|NIYWEY|1177	1178	NIYWEY	103.912
search1|NIYWEY|1178	1179	NIYWEY	100.706
search1|NIYWEY|1179	1180	NIYWEY	103.204
search1|NODDEP|1180	1181	NODDEP	112.206
search1|NOLGAW|1181	1182	NOLGAW	110.289
search1|NOLGAW|1182	1183	NOLGAW	109.249
search1|NONSEQ|1183	1184	NONSEQ	105.34
search1|NONSIU|1184	1185	NONSIU	105.832
search1|NONZOG|1185	1186	NONZOG	90.632
search1|NONZOG|1186	1187	NONZOG	94.164
search1|NONZOG|1187	1188	NONZOG	101.76
search1|NONZOG|1188	1189	NONZOG	99.759
search1|NOPQEO|1189	1190	NOPQEO	100.562
search1|NOVKEQ|1190	1191	NOVKEQ	109.528
search1|NOVKEQ|1191	1192	NOVKEQ	107.543
search1|NUCBOD|1192	1193	NUCBOD	83.703
search1|NUCBOD|1193	1194	NUCBOD	94.308
search1|NUCBUJ|1194	1195	NUCBUJ	76.071
search1|NUCBUJ|1195	1196	NUCBUJ	88.841
search1|NUFTAJ|1196	1197	NUFTAJ	105.051
search1|NUFTAJ|1197	1198	NUFTAJ	101.439
search1|NUFTAJ01|1198	1199	NUFTAJ01	101.439
search1|NUFTAJ01|1199	1200	NUFTAJ01	105.051
search1|NUHPOV|1200	1201	NUHPOV	104.184
search1|NUJSUH|1201	1202	NUJSUH	100.235
search1|NUJSUH|1202	1203	NUJSUH	106.35
search1|NUJSUH|1203	1204	NUJSUH	105.775
search1|NUKKIO|1204	1205	NUKKIO	102.333
search1|NUKKIO|1205	1206	NUKKIO	92.319
search1|NUKKIO|1206	1207	NUKKIO	113.183
search1|NUVCUC|1207	1208	NUVCUC	108.91
search1|NUVXUY|1208	1209	NUVXUY	98.555
search1|NUVXUY|1209	1210	NUVXUY	102.777
search1|OBOFAN|1210	1211	OBOFAN	98.136
search1|OBUGIB|1211	1212	OBUGIB	99.242
search1|OBUNAB|1212	1213	OBUNAB	103.11
search1|OBUNAB|1213	1214	OBUNAB	96.872
search1|OCOGET|1214	1215	OCOGET	99.033
search1|OCOGET|1215	1216	OCOGET	103.321
search1|ODABIE|1216	1217	ODABIE	92.543
search1|ODABIE|1217	1218	ODABIE	98.115
search1|ODABIE|1218	1219	ODABIE	96.739
search1|ODIPUN|1219	1220	ODIPUN	97.389
search1|ODIQAU|1220	1221	ODIQAU	98.197
search1|ODIQEY|1221	1222	ODIQEY	104.933
search1|ODIQEY|1222	1223	ODIQEY	99.35
search1|ODOGUL|1223	1224	ODOGUL	104.564
search1|ODUXAO|1224	1225	ODUXAO	94.819
search1|ODUXAO|1225	1226	ODUXAO	99.492
search1|ODUZUK|1226	1227	ODUZUK	99.313
search1|ODUZUK|1227	1228	ODUZUK	103.259
search1|ODUZUK|1228	1229	ODUZUK	104.849
search1|OGADOQ|1229	1230	OGADOQ	111.249
search1|OGADOQ01|1230	1231	OGADOQ01	110.503
search1|OGAKOX|1231	1232	OGAKOX	107.129
search1|OGARUL|1232	1233	OGARUL	97.932
search1|OGARUL|1233	1234	OGARUL	97.89
search1|OGASAS|1234	1235	OGASAS	100.827
search1|OGAXAX|1235	1236	OGAXAX	106.452
search1|OGAXAX|1236	1237	OGAXAX	98.783
search1|OGAXAX|1237	1238	OGAXAX	103.993
search1|OGEJIT|1238	1239	OGEJIT	93.161
search1|OGUWIX|1239	1240	OGUWIX	97.592
search1|OGUWIX|1240	1241	OGUWIX	98.18
search1|OGUWIX|1241	1242	OGUWIX	95.243
search1|OGUWIX|1242	1243	OGUWIX	96.929
search1|OHOCOE|1243	1244	OHOCOE	105.185
search1|OHOCOE|1244	1245	OHOCOE	95.813
search1|OJIZAI|1245	1246	OJIZAI	96.243
search1|OJIZAI|1246	1247	OJIZAI	98.843
search1|OKANOD|1247	1248	OKANOD	99.544
search1|OKAPAR|1248	1249	OKAPAR	98.765
search1|OKAPEV|1249	1250	OKAPEV	101.44
search1|OKAPEV|1250	1251	OKAPEV	105.896
search1|OKAWOO|1251	1252	OKAWOO	98.031
search1|OKAWUU|1252	1253	OKAWUU	104.428
search1|OKIHEW|1253	1254	OKIHEW	100.0
search1|OKIHEW|1254	1255	OKIHEW	97.881
search1|OKIHEW|1255	1256	OKIHEW	96.787
search1|OKIHIA|1256	1257	OKIHIA	98.815
search1|OKIHIA|1257	1258	OKIHIA	100.867
search1|OKIHOG|1258	1259	OKIHOG	97.941
search1|OKIHOG|1259	1260	OKIHOG	100.2
search1|OLAWOP|1260	1261	OLAWOP	98.343
search1|OLAWOP|1261	1262	OLAWOP	99.582
search1|OLAWOP|1262	1263	OLAWOP	97.717
search1|OLIKAW|1263	1264	OLIKAW	100.587
search1|OMENID|1264	1265	OMENID	102.837
search1|OMUZIG|1265	1266	OMUZIG	102.012
search1|OMUZIG|1266	1267	OMUZIG	101.254
search1|OPASEF|1267	1268	OPASEF	110.045
search1|OPASEF|1268	1269	OPASEF	102.217
search1|OPASEF|1269	1270	OPASEF	98.937
search1|OPASIJ|1270	1271	OPASIJ	100.561
search1|OPASIJ|1271	1272	OPASIJ	99.404
search1|OPOZOJ|1272	1273	OPOZOJ	103.512
search1|OPUKAM|1273	1274	OPUKAM	99.119
search1|OPUKAM|1274	1275	OPUKAM	97.539
search1|OQAKAT|1275	1276	OQAKAT	96.055
search1|OQAKAT|1276	1277	OQAKAT	94.803
search1|OQAKAT|1277	1278	OQAKAT	94.964
search1|OQAKAT|1278	1279	OQAKAT	95.176
search1|OQIKEF|1279	1280	OQIKEF	100.287
search1|OQODAA|1280	1281	OQODAA	106.789
search1|OTZPAG|1281	1282	OTZPAG	106.593
search1|OTZPAG|1282	1283	OTZPAG	103.963
search1|PAGTAT|1283	1284	PAGTAT	97.776
search1|PAGTAT|1284	1285	PAGTAT	93.748
search1|PAGTEX|1285	1286	PAGTEX	112.625
search1|PAGTEX|1286	1287	PAGTEX	106.923
search1|PAGTEX|1287	1288	PAGTEX	95.292
search1|PAGTEX|1288	1289	PAGTEX	93.505
search1|PAGTEX|1289	1290	PAGTEX	89.92
search1|PAGTEX|1290	1291	PAGTEX	100.757
search1|PAGTEX|1291	1292	PAGTEX	96.547
search1|PAGTEX|1292	1293	PAGTEX	103.589
search1|PAGTEX|1293	1294	PAGTEX	104.649
search1|PAGTEX|1294	1295	PAGTEX	124.263
search1|PAGTEX|1295	1296	PAGTEX	126.436
search1|PAGTEX|1296	1297	PAGTEX	98.019
search1|PAGTEX|1297	1298	PAGTEX	98.051
search1|PAGTOH|1298	1299	PAGTOH	104.782
search1|PAGTOH|1299	1300	PAGTOH	101.423
search1|PAGTOH|1300	1301	PAGTOH	97.409
search1|PANPID|1301	1302	PANPID	99.487
search1|PASBUI|1302	1303	PASBUI	97.38
search1|PASBUI|1303	1304	PASBUI	106.576
search1|PAZREO|1304	1305	PAZREO	101.441
search1|PEMPED|1305	1306	PEMPED	98.974
search1|PEMPED|1306	1307	PEMPED	101.191
search1|PEMPED|1307	1308	PEMPED	95.506
search1|PEPWOX|1308	1309	PEPWOX	94.492
search1|PEQQUY|1309	1310	PEQQUY	97.255
search1|PESGEB|1310	1311	PESGEB	101.593
search1|PESGEB|1311	1312	PESGEB	99.816
search1|PEVBIC|1312	1313	PEVBIC	105.404
search1|PEVBIC|1313	1314	PEVBIC	99.188
search1|PEVBIC|1314	1315	PEVBIC	95.88
search1|PEVZIA|1315	1316	PEVZIA	99.976
search1|PEVZOG|1316	1317	PEVZOG	101.461
search1|PEYBIF|1317	1318	PEYBIF	102.563
search1|PEYBIF|1318	1319	PEYBIF	96.739
search1|PEYBIF|1319	1320	PEYBIF	96.642
search1|PEYBIF|1320	1321	PEYBIF	100.477
search1|PEYBIF|1321	1322	PEYBIF	96.023
search1|PEYBIF|1322	1323	PEYBIF	102.524
search1|PEYBIF|1323	1324	PEYBIF	103.449
search1|PEYBIF|1324	1325	PEYBIF	96.893
search1|PEYHAD|1325	1326	PEYHAD	100.739
search1|PEYHAD|1326	1327	PEYHAD	96.916
search1|PEYLIP|1327	1328	PEYLIP	102.38
search1|PEYLIP|1328	1329	PEYLIP	96.559
search1|PEYLIP|1329	1330	PEYLIP	98.181
search1|PEYLIP|1330	1331	PEYLIP	96.232
search1|PIHCEP|1331	1332	PIHCEP	94.79
search1|PIHCEP|1332	1333	PIHCEP	92.79
search1|PIHCEP|1333	1334	PIHCEP	98.574
search1|PIHCEP|1334	1335	PIHCEP	100.206
search1|PIHJAS|1335	1336	PIHJAS	97.411
search1|PIHJEW|1336	1337	PIHJEW	98.57
search1|PIHJEW|1337	1338	PIHJEW	100.414
search1|PIJTIN|1338	1339	PIJTIN	98.844
search1|PIVZOJ|1339	1340	PIVZOJ	104.395
search1|PIVZOJ|1340	1341	PIVZOJ	108.954
search1|PIVZOJ|1341	1342	PIVZOJ	102.302
search1|PIVZOJ|1342	1343	PIVZOJ	108.055
search1|PIVZOJ|1343	1344	PIVZOJ	96.725
search1|PIVZOJ|1344	1345	PIVZOJ	81.301
search1|PIVZOJ10|1345	1346	PIVZOJ10	108.471
search1|PIVZOJ10|1346	1347	PIVZOJ10	106.583
search1|PIVZOJ10|1347	1348	PIVZOJ10	100.026
search1|PIVZOJ10|1348	1349	PIVZOJ10	104.231
search1|PIVZOJ10|1349	1350	PIVZOJ10	101.834
search1|PIVZOJ10|1350	1351	PIVZOJ10	88.945
search1|PIXYOL|1351	1352	PIXYOL	104.832
search1|PIXYOL|1352	1353	PIXYOL	102.812
search1|PIXYOL|1353	1354	PIXYOL	101.402
search1|PIXYOL|1354	1355	PIXYOL	101.387
search1|PIXZAY|1355	1356	PIXZAY	100.524
search1|PIXZAY|1356	1357	PIXZAY	106.123
search1|PIXZAY|1357	1358	PIXZAY	109.071
search1|PIXZAY|1358	1359	PIXZAY	105.501
search1|PIZZAZ|1359	1360	PIZZAZ	109.692
search1|PIZZAZ|1360	1361	PIZZAZ	107.978
search1|POMFIH|1361	1362	POMFIH	105.656
search1|POMFON|1362	1363	POMFON	102.665
search1|POMSEQ|1363	1364	POMSEQ	97.367
search1|PORQAO|1364	1365	PORQAO	106.622
search1|PORQAO|1365	1366	PORQAO	106.168
search1|PPHTCM|1366	1367	PPHTCM	97.494
search1|PPHTCM|1367	1368	PPHTCM	101.974
search1|PPHTCM|1368	1369	PPHTCM	98.051
search1|PUCVAL|1369	1370	PUCVAL	90.504
search1|PUKQIX|1370	1371	PUKQIX	99.893
search1|PUKQIX|1371	1372	PUKQIX	96.151
search1|PUKQIX|1372	1373	PUKQIX	103.609
search1|PUKQIX|1373	1374	PUKQIX	98.273
search1|PUKQIX|1374	1375	PUKQIX	101.705
search1|PUKQIX|1375	1376	PUKQIX	107.773
search1|PUKQIX|1376	1377	PUKQIX	92.882
search1|PUKQIX|1377	1378	PUKQIX	103.23
search1|PUKQIX|1378	1379	PUKQIX	96.648
search1|PUKQIX|1379	1380	PUKQIX	102.947
search1|PUKQIX|1380	1381	PUKQIX	103.257
search1|PUKQIX|1381	1382	PUKQIX	98.06
search1|PUKQIX|1382	1383	PUKQIX	94.801
search1|PUKQOD|1383	1384	PUKQOD	114.464
search1|PUKQOD|1384	1385	PUKQOD	109.84
search1|PUKQUJ|1385	1386	PUKQUJ	104.184
search1|PUKRAQ|1386	1387	PUKRAQ	100.192
search1|PUKRAQ|1387	1388	PUKRAQ	110.33
search1|PUPNUJ|1388	1389	PUPNUJ	103.249
search1|PUZNEF|1389	1390	PUZNEF	100.956
search1|PUZNEF|1390	1391	PUZNEF	94.942
search1|PYDCUT|1391	1392	PYDCUT	95.489
search1|PYDCUT|1392	1393	PYDCUT	96.166
search1|PYDCUT|1393	1394	PYDCUT	97.007
search1|PYDCUT|1394	1395	PYDCUT	100.559
search1|PYDCUT|1395	1396	PYDCUT	97.769
search1|QAFGAI|1396	1397	QAFGAI	94.247
search1|QAGWEB|1397	1398	QAGWEB	101.465
search1|QAGWEB|1398	1399	QAGWEB	101.444
search1|QAGWIF|1399	1400	QAGWIF	99.32
search1|QAGWIF02|1400	1401	QAGWIF02	98.526
search1|QAHMAO|1401	1402	QAHMAO	98.339
search1|QATSUA|1402	1403	QATSUA	103.339
search1|QATSUB|1403	1404	QATSUB	100.415
search1|QAVREM|1404	1405	QAVREM	99.31
search1|QAVREM|1405	1406	QAVREM	96.603
search1|QAVRIQ|1406	1407	QAVRIQ	96.696
search1|QAVRIQ|1407	1408	QAVRIQ	101.493
search1|QAXHAY|1408	1409	QAXHAY	104.609
search1|QAXHAY01|1409	1410	QAXHAY01	104.63
search1|QAXXOD|1410	1411	QAXXOD	103.779
search1|QAXYAQ|1411	1412	QAXYAQ	99.157
search1|QAYDEA|1412	1413	QAYDEA	109.108
search1|QAYDEA|1413	1414	QAYDEA	99.556
search1|QAZLOU|1414	1415	QAZLOU	100.783
search1|QAZLOU|1415	1416	QAZLOU	98.066
search1|QEHQUR|1416	1417	QEHQUR	97.295
search1|QEHSUT|1417	1418	QEHSUT	93.845
search1|QEHVAC|1418	1419	QEHVAC	97.396
search1|QEHVIK|1419	1420	QEHVIK	94.57
search1|QEHVIK|1420	1421	QEHVIK	97.09
search1|QEKBEO|1421	1422	QEKBEO	95.966
search1|QEKBEO|1422	1423	QEKBEO	98.312
search1|QEKBEO|1423	1424	QEKBEO	97.907
search1|QEYPEQ|1424	1425	QEYPEQ	96.681
search1|QEZLAJ|1425	1426	QEZLAJ	101.809
search1|QEZLAJ|1426	1427	QEZLAJ	99.003
search1|QIDYAD|1427	1428	QIDYAD	97.974
search1|QIDYAD|1428	1429	QIDYAD	96.028
search1|QIFMOJ|1429	1430	QIFMOJ	105.139
search1|QIFMOJ|1430	1431	QIFMOJ	106.081
search1|QIJJEY01|1431	1432	QIJJEY01	113.767
search1|QIJJEY01|1432	1433	QIJJEY01	112.271
search1|QIJJEY01|1433	1434	QIJJEY01	108.187
search1|QIJJEY01|1434	1435	QIJJEY01	110.488
search1|QIJJEY01|1435	1436	QIJJEY01	109.183
search1|QIJJEY01|1436	1437	QIJJEY01	110.807
search1|QIJJEY01|1437	1438	QIJJEY01	105.096
search1|QIJJEY01|1438	1439	QIJJEY01	110.078
search1|QIKYAK|1439	1440	QIKYAK	103.769
search1|QIKYAK|1440	1441	QIKYAK	99.024
search1|QIPXIW|1441	1442	QIPXIW	100.756
search1|QIRTUG|1442	1443	QIRTUG	105.923
search1|QIVWUO|1443	1444	QIVWUO	97.19
search1|QIXKUF|1444	1445	QIXKUF	99.468
search1|QOFXAL|1445	1446	QOFXAL	94.041
search1|QOFXEP|1446	1447	QOFXEP	95.895
search1|QOVVOO|1447	1448	QOVVOO	98.248
search1|QOVVOO|1448	1449	QOVVOO	95.767
search1|QOXLEV|1449	1450	QOXLEV	100.981
search1|QUCTUE|1450	1451	QUCTUE	100.958
search1|QUCTUE|1451	1452	QUCTUE	98.938
search1|QUCTUE|1452	1453	QUCTUE	118.08
search1|QUCVAM|1453	1454	QUCVAM	98.803
search1|QUCVEQ|1454	1455	QUCVEQ	111.488
search1|QUCVEQ|1455	1456	QUCVEQ	104.738
search1|QUCVEQ|1456	1457	QUCVEQ	98.448
search1|QUCVIU|1457	1458	QUCVIU	110.557
search1|QUCVIU|1458	1459	QUCVIU	93.456
search1|QUCVIU|1459	1460	QUCVIU	102.654
search1|QUCVOA|1460	1461	QUCVOA	103.03
search1|QUGSUH|1461	1462	QUGSUH	99.769
search1|QUMVAW|1462	1463	QUMVAW	99.161
search1|QUXKAW|1463	1464	QUXKAW	99.945
search1|QUXKAW|1464	1465	QUXKAW	108.047
search1|QUXKAW|1465	1466	QUXKAW	94.223
search1|QUXKAW|1466	1467	QUXKAW	97.45
search1|RAFLOA|1467	1468	RAFLOA	107.086
search1|RAFLOA|1468	1469	RAFLOA	109.857
search1|RAFLUG|1469	1470	RAFLUG	109.159
search1|RAFLUG|1470	1471	RAFLUG	108.507
search1|RAFMAN|1471	1472	RAFMAN	110.581
search1|RAFMAN|1472	1473	RAFMAN	109.69
search1|RAFMER|1473	1474	RAFMER	107.17
search1|RAFMER|1474	1475	RAFMER	110.514
search1|RAHYUW|1475	1476	RAHYUW	99.725
search1|RALFUF|1476	1477	RALFUF	109.085
search1|RALFUF|1477	1478	RALFUF	102.87
search1|RALFUF|1478	1479	RALFUF	108.457
search1|RALGAM|1479	1480	RALGAM	106.101
search1|RALGIU|1480	1481	RALGIU	96.807
search1|RALGIU|1481	1482	RALGIU	109.639
search1|RALGIU01|1482	1483	RALGIU01	99.314
search1|RALGIU01|1483	1484	RALGIU01	101.543
search1|RALPOK|1484	1485	RALPOK	102.118
search1|RALPOK|1485	1486	RALPOK	101.88
search1|RAPVAF02|1486	1487	RAPVAF02	97.403
search1|RAPVAF02|1487	1488	RAPVAF02	92.881
search1|RAQZIU|1488	1489	RAQZIU	100.825
search1|RAQZIU|1489	1490	RAQZIU	97.532
search1|RAQZOA|1490	1491	RAQZOA	94.174
search1|RASGAT|1491	1492	RASGAT	111.067
search1|RASGAT|1492	1493	RASGAT	111.081
search1|RASGAT|1493	1494	RASGAT	105.863
search1|RASGEX|1494	1495	RASGEX	103.791
search1|RASJEC|1495	1496	RASJEC	97.241
search1|RATBOF|1496	1497	RATBOF	96.373
search1|RATBOF|1497	1498	RATBOF	97.687
search1|RATBOF|1498	1499	RATBOF	97.296
search1|RATCEW|1499	1500	RATCEW	94.287
search1|RATCEW|1500	1501	RATCEW	96.649
search1|RATCEW|1501	1502	RATCEW	95.133
search1|RATCIA|1502	1503	RATCIA	97.387
search1|RATCIA|1503	1504	RATCIA	100.135
search1|RATCOG|1504	1505	RATCOG	94.428
search1|RATCOG|1505	1506	RATCOG	97.148
search1|RATCUM|1506	1507	RATCUM	95.918
search1|RATCUM|1507	1508	RATCUM	102.792
search1|RATKAA|1508	1509	RATKAA	96.21
search1|RATKAA|1509	1510	RATKAA	96.854
search1|RATKEE|1510	1511	RATKEE	103.048
search1|RATKEE|1511	1512	RATKEE	105.94
search1|RATKEE|1512	1513	RATKEE	95.8
search1|RAWQAI|1513	1514	RAWQAI	104.489
search1|RAWQEM|1514	1515	RAWQEM	107.686
search1|REBMER|1515	1516	REBMER	99.8
search1|RECXEC|1516	1517	RECXEC	100.611
search1|RECXEC|1517	1518	RECXEC	99.463
search1|RECXEC|1518	1519	RECXEC	94.514
search1|REJNAV|1519	1520	REJNAV	101.567
search1|REJNAV|1520	1521	REJNAV	100.316
search1|REMMEC|1521	1522	REMMEC	102.124
search1|REMMEC|1522	1523	REMMEC	104.308
search1|REMMEC|1523	1524	REMMEC	97.838
search1|REMMEC|1524	1525	REMMEC	96.446
search1|REMMEC|1525	1526	REMMEC	96.318
search1|REMMEC|1526	1527	REMMEC	94.594
search1|REMMEC|1527	1528	REMMEC	96.8
search1|REMMEC|1528	1529	REMMEC	102.261
search1|REQGUR|1529	1530	REQGUR	91.458
search1|REQWER|1530	1531	REQWER	97.71
search1|REQWER|1531	1532	REQWER	98.313
search1|REQWIV|1532	1533	REQWIV	99.654
search1|REQWOB|1533	1534	REQWOB	97.183
search1|REQWOB|1534	1535	REQWOB	95.765
search1|REQWOB|1535	1536	REQWOB	93.146
search1|REZJUD|1536	1537	REZJUD	102.303
search1|RISWEV|1537	1538	RISWEV	92.497
search1|RISWEV|1538	1539	RISWEV	107.546
search1|RISWEV|1539	1540	RISWEV	93.991
search1|RISWEV|1540	1541	RISWEV	108.896
search1|RIXDIM|1541	1542	RIXDIM	96.886
search1|RIXDIM|1542	1543	RIXDIM	102.485
search1|RIXFAG|1543	1544	RIXFAG	102.088
search1|ROKLEI|1544	1545	ROKLEI	94.247
search1|ROQPOC|1545	1546	ROQPOC	108.683
search1|ROQPOC|1546	1547	ROQPOC	109.579
search1|ROQPOC|1547	1548	ROQPOC	107.958
search1|ROQPOC|1548	1549	ROQPOC	109.719
search1|ROQPUI|1549	1550	ROQPUI	105.65
search1|ROQPUI|1550	1551	ROQPUI	109.387
search1|ROQPUI|1551	1552	ROQPUI	107.77
search1|RORWEA|1552	1553	RORWEA	95.978
search1|ROVWEG|1553	1554	ROVWEG	97.568
search1|ROVWEG|1554	1555	ROVWEG	100.512
search1|ROVWEG|1555	1556	ROVWEG	103.19
search1|ROVWEG|1556	1557	ROVWEG	96.734
search1|ROVWEG|1557	1558	ROVWEG	99.321
search1|ROVWEG|1558	1559	ROVWEG	100.175
search1|ROVWEG|1559	1560	ROVWEG	108.123
search1|ROVWEG|1560	1561	ROVWEG	108.458
search1|ROVWEG|1561	1562	ROVWEG	100.356
search1|ROVWEG|1562	1563	ROVWEG	115.638
search1|ROVWEG|1563	1564	ROVWEG	97.214
search1|ROVWEG|1564	1565	ROVWEG	97.826
search1|ROVWIK|1565	1566	ROVWIK	109.846
search1|ROVWOQ|1566	1567	ROVWOQ	97.588
search1|ROVWOQ|1567	1568	ROVWOQ	100.383
search1|RUGQER|1568	1569	RUGQER	100.074
search1|RUGQER|1569	1570	RUGQER	100.771
search1|RUGQER01|1570	1571	RUGQER01	100.28
search1|RUGQER01|1571	1572	RUGQER01	100.378
search1|RUJSUL|1572	1573	RUJSUL	104.797
search1|RUMWAY|1573	1574	RUMWAY	99.162
search1|RUMWAY|1574	1575	RUMWAY	98.934
search1|RUNWUT|1575	1576	RUNWUT	93.679
search1|RUNXAA|1576	1577	RUNXAA	97.293
search1|RUNXAA|1577	1578	RUNXAA	89.951
search1|RUNXEE|1578	1579	RUNXEE	107.535
search1|RUNXEE|1579	1580	RUNXEE	98.62
search1|SABLAJ|1580	1581	SABLAJ	100.103
search1|SABLAJ|1581	1582	SABLAJ	102.594
search1|SABLAJ|1582	1583	SABLAJ	99.582
search1|SABLAJ|1583	1584	SABLAJ	98.21
search1|SABLAJ|1584	1585	SABLAJ	95.729
search1|SABLAJ|1585	1586	SABLAJ	98.873
search1|SAFKIV|1586	1587	SAFKIV	104.033
search1|SAHDOU|1587	1588	SAHDOU	100.446
search1|SAJKOD|1588	1589	SAJKOD	97.024
search1|SAKNOI|1589	1590	SAKNOI	106.532
search1|SAKNOI|1590	1591	SAKNOI	106.983
search1|SAKNOI|1591	1592	SAKNOI	108.602
search1|SAKNOI|1592	1593	SAKNOI	108.339
search1|SAKNUO|1593	1594	SAKNUO	107.438
search1|SAKNUO|1594	1595	SAKNUO	109.506
search1|SAVZIZ|1595	1596	SAVZIZ	108.165
search1|SAVZIZ|1596	1597	SAVZIZ	109.139
search1|SAVZIZ|1597	1598	SAVZIZ	101.217
search1|SAVZIZ|1598	1599	SAVZIZ	101.364
search1|SAXLAE|1599	1600	SAXLAE	102.453
search1|SAYGEE|1600	1601	SAYGEE	101.3
search1|SAYGOO|1601	1602	SAYGOO	101.736
search1|SAYGOO|1602	1603	SAYGOO	105.974
search1|SAYGUU|1603	1604	SAYGUU	116.98
search1|SAYGUU|1604	1605	SAYGUU	107.605
search1|SAYHAB|1605	1606	SAYHAB	104.106
search1|SAYHEF|1606	1607	SAYHEF	104.079
search1|SAYHIJ|1607	1608	SAYHIJ	107.288
search1|SCYNAG|1608	1609	SCYNAG	113.469
search1|SCYNAG01|1609	1610	SCYNAG01	113.085
search1|SEDGEN|1610	1611	SEDGEN	99.418
search1|SEDGEN|1611	1612	SEDGEN	104.07
search1|SEGQAY|1612	1613	SEGQAY	106.506
search1|SEGQEC|1613	1614	SEGQEC	102.074
search1|SEGQEC|1614	1615	SEGQEC	101.529
search1|SEGQEC|1615	1616	SEGQEC	103.672
search1|SEGQEC|1616	1617	SEGQEC	94.331
search1|SEGQEC|1617	1618	SEGQEC	98.179
search1|SEGQEC|1618	1619	SEGQEC	101.731
search1|SEGQIG|1619	1620	SEGQIG	93.876
search1|SELBIW|1620	1621	SELBIW	99.005
search1|SELBIW|1621	1622	SELBIW	108.91
search1|SELBIW|1622	1623	SELBIW	101.47
search1|SENDEV|1623	1624	SENDEV	98.34
search1|SEPPAF|1624	1625	SEPPAF	101.023
search1|SEZBOO10|1625	1626	SEZBOO10	95.612
search1|SEZBOO10|1626	1627	SEZBOO10	94.866
search1|SEZBOO10|1627	1628	SEZBOO10	96.214
search1|SEZBOO10|1628	1629	SEZBOO10	95.847
search1|SEZBOO11|1629	1630	SEZBOO11	97.647
search1|SEZBOO11|1630	1631	SEZBOO11	95.519
search1|SEZBOO11|1631	1632	SEZBOO11	95.272
search1|SEZBOO11|1632	1633	SEZBOO11	95.855
search1|SEZBOO22|1633	1634	SEZBOO22	96.157
search1|SEZBOO22|1634	1635	SEZBOO22	96.755
search1|SEZBOO22|1635	1636	SEZBOO22	94.525
search1|SEZBOO22|1636	1637	SEZBOO22	99.25
search1|SICXEI|1637	1638	SICXEI	98.637
search1|SICXEI|1638	1639	SICXEI	97.163
search1|SICXEI|1639	1640	SICXEI	92.896
search1|SICXEI|1640	1641	SICXEI	93.259
search1|SICXEI|1641	1642	SICXEI	99.723
search1|SICXEI|1642	1643	SICXEI	98.332
search1|SICXEI|1643	1644	SICXEI	99.453
search1|SICXEI|1644	1645	SICXEI	99.887
search1|SIJGAU|1645	1646	SIJGAU	105.254
search1|SILNIK|1646	1647	SILNIK	96.534
search1|SILNIK|1647	1648	SILNIK	95.666
search1|SILNIK|1648	1649	SILNIK	97.081
search1|SILNIK|1649	1650	SILNIK	97.118
search1|SIVNAN|1650	1651	SIVNAN	100.511
search1|SIVNER|1651	1652	SIVNER	96.077
search1|SIXWEB|1652	1653	SIXWEB	109.279
search1|SOCCOD|1653	1654	SOCCOD	93.641
search1|SOCCUJ|1654	1655	SOCCUJ	93.425
search1|SOHGAY|1655	1656	SOHGAY	94.598
search1|SOPTIB|1656	1657	SOPTIB	111.885
search1|SOPTUN|1657	1658	SOPTUN	106.072
search1|SOPTUN|1658	1659	SOPTUN	113.81
search1|SOPVAV|1659	1660	SOPVAV	95.832
search1|SOPVAV|1660	1661	SOPVAV	101.202
search1|SOQTEY|1661	1662	SOQTEY	101.69
search1|SOQTEY|1662	1663	SOQTEY	99.977
search1|SOQTEY|1663	1664	SOQTEY	98.001
search1|SOQTEY|1664	1665	SOQTEY	103.442
search1|SOQTEY|1665	1666	SOQTEY	95.05
search1|SOQTEY|1666	1667	SOQTEY	102.752
search1|SOQTEY01|1667	1668	SOQTEY01	102.711
search1|SOQTEY01|1668	1669	SOQTEY01	96.181
search1|SOQTEY01|1669	1670	SOQTEY01	98.483
search1|SOQTEY01|1670	1671	SOQTEY01	102.123
search1|SORHUD|1671	1672	SORHUD	106.876
search1|SORJAL|1672	1673	SORJAL	94.11
search1|SOTLUJ|1673	1674	SOTLUJ	101.543
search1|SOTLUJ|1674	1675	SOTLUJ	98.919
search1|SOTLUJ|1675	1676	SOTLUJ	99.603
search1|SOTMOE|1676	1677	SOTMOE	104.946
search1|SOYBUE|1677	1678	SOYBUE	97.803
search1|SOYBUE|1678	1679	SOYBUE	97.738
search1|SOYCAL|1679	1680	SOYCAL	99.441
search1|SOYCAL|1680	1681	SOYCAL	95.222
search1|SOYCAL|1681	1682	SOYCAL	95.33
search1|SOYCAL|1682	1683	SOYCAL	99.771
search1|STETCU|1683	1684	STETCU	90.249
search1|SUJLOY|1684	1685	SUJLOY	105.731
search1|SUQBEM|1685	1686	SUQBEM	97.116
search1|SUQVUX|1686	1687	SUQVUX	98.913
search1|SUZFAU|1687	1688	SUZFAU	104.205
search1|SUZFAU|1688	1689	SUZFAU	104.629
search1|TAJLOH|1689	1690	TAJLOH	104.958
search1|TAJLOH|1690	1691	TAJLOH	102.693
search1|TAPTOU|1691	1692	TAPTOU	100.676
search1|TCAGTU|1692	1693	TCAGTU	100.928
search1|TCAGTU02|1693	1694	TCAGTU02	99.988
search1|TCAPCU|1694	1695	TCAPCU	94.346
search1|TCHXPH10|1695	1696	TCHXPH10	102.805
search1|TCHXPH10|1696	1697	TCHXPH10	101.026
search1|TCMNET10|1697	1698	TCMNET10	103.65
search1|TCMPPD|1698	1699	TCMPPD	105.895
search1|TCPEPD10|1699	1700	TCPEPD10	111.503
search1|TCPOLM10|1700	1701	TCPOLM10	100.794
search1|TCPOLM10|1701	1702	TCPOLM10	100.837
search1|TCPOLM11|1702	1703	TCPOLM11	101.421
search1|TCPOLM11|1703	1704	TCPOLM11	101.471
search1|TCPPHG|1704	1705	TCPPHG	100.793
search1|TCPPHG|1705	1706	TCPPHG	104.541
search1|TCPPHG01|1706	1707	TCPPHG01	97.98
search1|TCPPHG01|1707	1708	TCPPHG01	97.568
search1|TCPPHG01|1708	1709	TCPPHG01	101.491
search1|TCPPHG01|1709	1710	TCPPHG01	104.24
search1|TCPYPT|1710	1711	TCPYPT	105.5
search1|TCTPAG|1711	1712	TCTPAG	103.994
search1|TCTPHG|1712	1713	TCTPHG	99.563
search1|TCTPHG|1713	1714	TCTPHG	98.598
search1|TCYENI10|1714	1715	TCYENI10	101.337
search1|TEBDEJ|1715	1716	TEBDEJ	112.311
search1|TEBDEJ|1716	1717	TEBDEJ	97.527
search1|TEBDEJ|1717	1718	TEBDEJ	97.102
search1|TEBZAD|1718	1719	TEBZAD	98.113
search1|TEBZAD|1719	1720	TEBZAD	104.153
search1|TEGYAH|1720	1721	TEGYAH	97.777
search1|TEHHEV|1721	1722	TEHHEV	100.075
search1|TENHGT|1722	1723	TENHGT	101.449
search1|TENHGT|1723	1724	TENHGT	98.035
search1|TEYBUU|1724	1725	TEYBUU	101.46
search1|TEYBUU|1725	1726	TEYBUU	103.994
search1|TEYJIS|1726	1727	TEYJIS	99.67
search1|TEYJIS|1727	1728	TEYJIS	99.411
search1|TEZXUS|1728	1729	TEZXUS	100.171
search1|THDPPD10|1729	1730	THDPPD10	107.311
search1|THLHGB|1730	1731	THLHGB	100.35
search1|THPPDP|1731	1732	THPPDP	100.226
search1|TIBVEH|1732	1733	TIBVEH	100.792
search1|TIBWEI|1733	1734	TIBWEI	98.416
search1|TIBWEI|1734	1735	TIBWEI	106.86
search1|TIBWIM|1735	1736	TIBWIM	95.252
search1|TIBWIM|1736	1737	TIBWIM	98.64
search1|TIDCUF01|1737	1738	TIDCUF01	97.225
search1|TIDCUF01|1738	1739	TIDCUF01	107.527
search1|TIDRUT|1739	1740	TIDRUT	104.32
search1|TIDRUT|1740	1741	TIDRUT	106.268
search1|TIDZAJ|1741	1742	TIDZAJ	95.969
search1|TISLOX|1742	1743	TISLOX	112.435
search1|TISMAK|1743	1744	TISMAK	101.285
search1|TISMAK|1744	1745	TISMAK	100.259
search1|TISMAK|1745	1746	TISMAK	102.979
search1|TISMAK|1746	1747	TISMAK	104.708
search1|TISMAK|1747	1748	TISMAK	106.289
search1|TISMAK|1748	1749	TISMAK	110.773
search1|TISMAK|1749	1750	TISMAK	112.537
search1|TISMAK|1750	1751	TISMAK	109.005
search1|TISMAK|1751	1752	TISMAK	99.111
search1|TIVXAY|1752	1753	TIVXAY	98.076
search1|TIVXAY|1753	1754	TIVXAY	99.836
search1|TIWTID|1754	1755	TIWTID	104.653
search1|TIZMIY|1755	1756	TIZMIY	104.545
search1|TORMIW|1756	1757	TORMIW	103.498
search1|TORMIW|1757	1758	TORMIW	100.681
search1|TORMIW01|1758	1759	TORMIW01	104.288
search1|TORMIW01|1759	1760	TORMIW01	105.77
search1|TORSIC|1760	1761	TORSIC	102.597
search1|TORSIC|1761	1762	TORSIC	102.571
search1|TOSBOS|1762	1763	TOSBOS	101.354
search1|TOSBOS|1763	1764	TOSBOS	101.107
search1|TOXFIX|1764	1765	TOXFIX	97.311
search1|TOXYIQ|1765	1766	TOXYIQ	91.353
search1|TOXZAJ|1766	1767	TOXZAJ	97.492
search1|TOXZAJ|1767	1768	TOXZAJ	96.878
search1|TOXZAJ|1768	1769	TOXZAJ	94.548
search1|TPARHG10|1769	1770	TPARHG10	102.644
search1|TPARHG10|1770	1771	TPARHG10	99.97
search1|TPPTCP01|1771	1772	TPPTCP01	102.856
search1|TPPTCP10|1772	1773	TPPTCP10	103.61
search1|TPTCHG|1773	1774	TPTCHG	96.422
search1|TPTCHG|1774	1775	TPTCHG	98.011
search1|TPTCHG|1775	1776	TPTCHG	98.219
search1|TPTCHG|1776	1777	TPTCHG	103.123
search1|TUBMUA|1777	1778	TUBMUA	101.503
search1|TUBNAH|1778	1779	TUBNAH	100.909
search1|TUGFIM|1779	1780	TUGFIM	102.269
search1|TUGFIM|1780	1781	TUGFIM	110.307
search1|TUGFIM|1781	1782	TUGFIM	103.758
search1|TUGFIM|1782	1783	TUGFIM	98.202
search1|TUGFIM|1783	1784	TUGFIM	107.886
search1|TUGKEN|1784	1785	TUGKEN	100.952
search1|TUGKEN|1785	1786	TUGKEN	93.374
search1|TUGKEN|1786	1787	TUGKEN	89.139
search1|TUGKEN|1787	1788	TUGKEN	100.116
search1|TUKBEG|1788	1789	TUKBEG	107.328
search1|TUKBEG|1789	1790	TUKBEG	106.022
search1|TUKBEG|1790	1791	TUKBEG	109.289
search1|TUKBEG|1791	1792	TUKBEG	102.506
search1|TUKBEG|1792	1793	TUKBEG	106.458
search1|TUKBEG|1793	1794	TUKBEG	100.122
search1|TUKBEG|1794	1795	TUKBEG	107.583
search1|TUKBEG|1795	1796	TUKBEG	109.814
search1|TUKBEG|1796	1797	TUKBEG	109.606
search1|TUKBEG|1797	1798	TUKBEG	106.137
search1|TUKSUO|1798	1799	TUKSUO	103.709
search1|TURGES|1799	1800	TURGES	104.297
search1|TURMEZ|1800	1801	TURMEZ	95.888
search1|TUTJIB|1801	1802	TUTJIB	99.577
search1|TUVKOL|1802	1803	TUVKOL	99.171
search1|TUVKOL|1803	1804	TUVKOL	95.57
search1|TUVKOL|1804	1805	TUVKOL	96.098
search1|TUVKOL|1805	1806	TUVKOL	99.423
search1|TUVKUR|1806	1807	TUVKUR	102.068
search1|TUVLAY|1807	1808	TUVLAY	96.384
search1|TUWRIN|1808	1809	TUWRIN	104.943
search1|TUWRIN|1809	1810	TUWRIN	100.423
search1|TUWROT|1810	1811	TUWROT	100.247
search1|TUWROT|1811	1812	TUWROT	96.723
search1|TUWROT01|1812	1813	TUWROT01	95.908
search1|TUWROT01|1813	1814	TUWROT01	98.084
search1|TUYPIO|1814	1815	TUYPIO	98.071
search1|TUYPIO|1815	1816	TUYPIO	98.093
search1|UCEYAD|1816	1817	UCEYAD	105.024
search1|UCEYAD|1817	1818	UCEYAD	100.88
search1|UCEYAD|1818	1819	UCEYAD	99.6
search1|UCEYAD|1819	1820	UCEYAD	102.458
search1|UCEYAD|1820	1821	UCEYAD	86.633
search1|UCEYAD|1821	1822	UCEYAD	79.622
search1|UCEYEH|1822	1823	UCEYEH	90.912
search1|UCEYUX|1823	1824	UCEYUX	101.841
search1|UCOCEU|1824	1825	UCOCEU	104.413
search1|UFASOK|1825	1826	UFASOK	106.176
search1|UFOBEY|1826	1827	UFOBEY	101.552
search1|UFOBEY|1827	1828	UFOBEY	102.106
search1|UFOBEY|1828	1829	UFOBEY	100.764
search1|UFOBEY|1829	1830	UFOBEY	97.665
search1|UFOBEY|1830	1831	UFOBEY	100.764
search1|UFOBEY|1831	1832	UFOBEY	100.172
search1|UFOBEY|1832	1833	UFOBEY	99.715
search1|UFOBEY|1833	1834	UFOBEY	99.345
search1|UFOBIC|1834	1835	UFOBIC	96.869
search1|UFOBIC|1835	1836	UFOBIC	100.359
search1|UFOBIC|1836	1837	UFOBIC	102.501
search1|UFOBIC|1837	1838	UFOBIC	100.506
search1|UFOBIC|1838	1839	UFOBIC	100.782
search1|UFOBIC|1839	1840	UFOBIC	101.377
search1|UFOBIC|1840	1841	UFOBIC	97.537
search1|UFOBIC|1841	1842	UFOBIC	99.48
search1|UFOBIC|1842	1843	UFOBIC	101.216
search1|UFOBIC|1843	1844	UFOBIC	99.324
search1|UFOBIC|1844	1845	UFOBIC	101.995
search1|UFOBIC|1845	1846	UFOBIC	101.589
search1|UFUTAQ|1846	1847	UFUTAQ	98.783
search1|UFUTEU|1847	1848	UFUTEU	99.304
search1|UGAXAB|1848	1849	UGAXAB	104.561
search1|UGAXAB|1849	1850	UGAXAB	92.209
search1|UGAXAB|1850	1851	UGAXAB	104.038
search1|UGAXAB|1851	1852	UGAXAB	94.278
search1|UGEPAX|1852	1853	UGEPAX	100.899
search1|UGUJEM|1853	1854	UGUJEM	106.772
search1|UGUJEM|1854	1855	UGUJEM	94.786
search1|UGUJIQ|1855	1856	UGUJIQ	103.654
search1|UGUJIQ|1856	1857	UGUJIQ	106.983
search1|UHAXUW|1857	1858	UHAXUW	107.432
search1|UHAXUW|1858	1859	UHAXUW	97.342
search1|UHODUQ|1859	1860	UHODUQ	93.679
search1|UMAFIY|1860	1861	UMAFIY	106.852
search1|UMAFIY|1861	1862	UMAFIY	108.583
search1|UMAVEJ|1862	1863	UMAVEJ	102.157
search1|UNAMIH|1863	1864	UNAMIH	101.357
search1|UNARIK|1864	1865	UNARIK	99.069
search1|UNOCEG|1865	1866	UNOCEG	99.925
search1|UNOCEG01|1866	1867	UNOCEG01	100.249
search1|UQOMIX|1867	1868	UQOMIX	97.613
search1|UQOMIX|1868	1869	UQOMIX	97.373
search1|UQOMIX|1869	1870	UQOMIX	102.494
search1|UQOMOD|1870	1871	UQOMOD	92.856
search1|UQOMOD|1871	1872	UQOMOD	90.814
search1|UQOMOD|1872	1873	UQOMOD	94.085
search1|UQOMOD|1873	1874	UQOMOD	91.245
search1|UQOMUJ|1874	1875	UQOMUJ	101.441
search1|UVODEP|1875	1876	UVODEP	98.541
search1|UWIGIR|1876	1877	UWIGIR	96.714
search1|UWIGIR|1877	1878	UWIGIR	98.803
search1|VABBEG|1878	1879	VABBEG	99.121
search1|VABBEG|1879	1880	VABBEG	101.89
search1|VABBEG|1880	1881	VABBEG	101.728
search1|VABBEG|1881	1882	VABBEG	101.314
search1|VABBEG|1882	1883	VABBEG	100.221
search1|VABBEG|1883	1884	VABBEG	102.545
search1|VABBEG|1884	1885	VABBEG	104.554
search1|VABBEG|1885	1886	VABBEG	105.142
search1|VAHCAJ|1886	1887	VAHCAJ	102.931
search1|VAHCAJ|1887	1888	VAHCAJ	107.689
search1|VAHCAJ|1888	1889	VAHCAJ	107.419
search1|VAHCAJ|1889	1890	VAHCAJ	103.645
search1|VALDUI|1890	1891	VALDUI	106.593
search1|VATBEY|1891	1892	VATBEY	104.505
search1|VATBEY|1892	1893	VATBEY	103.501
search1|VAWCIF01|1893	1894	VAWCIF01	100.743
search1|VAWHOQ|1894	1895	VAWHOQ	97.332
search1|VAWHOQ|1895	1896	VAWHOQ	97.658
search1|VAWHOQ|1896	1897	VAWHOQ	97.821
search1|VAWHOQ|1897	1898	VAWHOQ	98.038
search1|VAXMOW|1898	1899	VAXMOW	106.028
search1|VDMSOP10|1899	1900	VDMSOP10	106.017
search1|VDMSOP10|1900	1901	VDMSOP10	106.918
search1|VDMSOP10|1901	1902	VDMSOP10	103.499
search1|VEDVEF|1902	1903	VEDVEF	97.027
search1|VEDVEF|1903	1904	VEDVEF	102.061
search1|VEGHUK|1904	1905	VEGHUK	95.499
search1|VEGHUK|1905	1906	VEGHUK	104.882
search1|VEGHUK|1906	1907	VEGHUK	103.637
search1|VEGJAS|1907	1908	VEGJAS	109.575
search1|VEGJAS|1908	1909	VEGJAS	106.771
search1|VEGQIJ|1909	1910	VEGQIJ	100.25
search1|VEPFAX10|1910	1911	VEPFAX10	83.697
search1|VEPFEB10|1911	1912	VEPFEB10	97.874
search1|VEQXIY|1912	1913	VEQXIY	103.736
search1|VEQXIY|1913	1914	VEQXIY	109.695
search1|VERBEB|1914	1915	VERBEB	108.845
search1|VERBEB|1915	1916	VERBEB	107.747
search1|VERBEB|1916	1917	VERBEB	108.521
search1|VERBEB|1917	1918	VERBEB	108.915
search1|VERFIH|1918	1919	VERFIH	105.465
search1|VIGFIC|1919	1920	VIGFIC	96.567
search1|VIGFIC|1920	1921	VIGFIC	100.051
search1|VIHVUF|1921	1922	VIHVUF	105.37
search1|VILYAR|1922	1923	VILYAR	149.488
search1|VISWEZ|1923	1924	VISWEZ	98.88
search1|VISWEZ|1924	1925	VISWEZ	100.057
search1|VIWBUY|1925	1926	VIWBUY	104.36
search1|VOLTOG|1926	1927	VOLTOG	99.13
search1|VOMBIJ|1927	1928	VOMBIJ	100.106
search1|VOMBIJ|1928	1929	VOMBIJ	97.199
search1|VOMBIJ|1929	1930	VOMBIJ	97.219
search1|VOMBIJ|1930	1931	VOMBIJ	93.972
search1|VOMBIJ|1931	1932	VOMBIJ	97.078
search1|VOMBIJ|1932	1933	VOMBIJ	100.499
search1|VOMBOP|1933	1934	VOMBOP	93.617
search1|VOMBOP|1934	1935	VOMBOP	96.013
search1|VOMBOP|1935	1936	VOMBOP	98.632
search1|VORSOK|1936	1937	VORSOK	102.879
search1|VORSOK|1937	1938	VORSOK	102.78
search1|VORSOK01|1938	1939	VORSOK01	105.201
search1|VORSOK01|1939	1940	VORSOK01	104.388
search1|VUDQIV|1940	1941	VUDQIV	108.811
search1|VUJVAZ|1941	1942	VUJVAZ	104.819
search1|VUJVAZ|1942	1943	VUJVAZ	102.119
search1|VUJVAZ|1943	1944	VUJVAZ	97.825
search1|VUJVAZ|1944	1945	VUJVAZ	104.164
search1|VUJVAZ|1945	1946	VUJVAZ	98.956
search1|VUJYIJ|1946	1947	VUJYIJ	99.241
search1|VUJYIJ|1947	1948	VUJYIJ	98.995
search1|VUJYIJ|1948	1949	VUJYIJ	99.21
search1|VUJYIJ|1949	1950	VUJYIJ	98.883
search1|VUJYOP|1950	1951	VUJYOP	96.259
search1|VUJYOP|1951	1952	VUJYOP	104.699
search1|VUNFAM|1952	1953	VUNFAM	101.967
search1|VUNFAM|1953	1954	VUNFAM	98.494
search1|VUWGUP|1954	1955	VUWGUP	83.581
search1|VUWHAW|1955	1956	VUWHAW	89.258
search1|VUWHAW|1956	1957	VUWHAW	90.223
search1|VUWHAW01|1957	1958	VUWHAW01	89.349
search1|VUWHAW01|1958	1959	VUWHAW01	90.169
search1|VUYZEU|1959	1960	VUYZEU	99.875
search1|VUYZEU|1960	1961	VUYZEU	99.911
search1|VUYZEU|1961	1962	VUYZEU	94.456
search1|VUYZEU|1962	1963	VUYZEU	92.889
search1|WABDAF|1963	1964	WABDAF	99.246
search1|WABDAF|1964	1965	WABDAF	97.855
search1|WAHJEX|1965	1966	WAHJEX	99.374
search1|WAHJEX|1966	1967	WAHJEX	94.636
search1|WAJHUL|1967	1968	WAJHUL	105.768
search1|WAJHUL|1968	1969	WAJHUL	105.767
search1|WAJHUL|1969	1970	WAJHUL	105.769
search1|WAJJAT|1970	1971	WAJJAT	100.124
search1|WAJJAT|1971	1972	WAJJAT	99.815
search1|WAVFAB|1972	1973	WAVFAB	100.195
search1|WAVFEF|1973	1974	WAVFEF	98.319
search1|WAVFEF|1974	1975	WAVFEF	98.212
search1|WEBVOO|1975	1976	WEBVOO	94.754
search1|WEBXOQ|1976	1977	WEBXOQ	102.559
search1|WECCEM|1977	1978	WECCEM	94.445
search1|WECREC|1978	1979	WECREC	98.651
search1|WECREC|1979	1980	WECREC	97.71
search1|WECRIG|1980	1981	WECRIG	97.722
search1|WEDQUR|1981	1982	WEDQUR	92.365
search1|WEDQUR|1982	1983	WEDQUR	87.931
search1|WEHLEC|1983	1984	WEHLEC	101.018
search1|WEMTOX|1984	1985	WEMTOX	96.634
search1|WEMTOX|1985	1986	WEMTOX	97.476
search1|WEMTOX|1986	1987	WEMTOX	97.389
search1|WEMTOX|1987	1988	WEMTOX	97.457
search1|WEWZUT|1988	1989	WEWZUT	103.573
search1|WEWZUT|1989	1990	WEWZUT	104.671
search1|WEYXOO|1990	1991	WEYXOO	95.035
search1|WEYXUU|1991	1992	WEYXUU	94.074
search1|WEYXUU|1992	1993	WEYXUU	95.352
search1|WEZMIZ|1993	1994	WEZMIZ	97.773
search1|WEZMOF|1994	1995	WEZMOF	94.088
search1|WEZMUL|1995	1996	WEZMUL	104.376
search1|WIBBEP|1996	1997	WIBBEP	98.614
search1|WICGEU|1997	1998	WICGEU	102.779
search1|WICGEU|1998	1999	WICGEU	101.375
[truncated: 255 more rows]
